# Supplementary material for: Heteromeric clusters of ubiquitinated ER-shaping proteins drive ER-phagy
Source: PubMed Central journal article supplement (PMC10247384; doi:10.1038/s41586-023-06090-9), 2023-05-24
Supplement: 41586_2023_6090_MOESM1_ESM.pdf [file 41586_2023_6090_MOESM1_ESM.pdf]

---

**Supplementary information**

---

**Heteromeric clusters of ubiquitinated ER-shaping proteins drive ER-phagy**

---

In the format provided by the authors and unedited

**FIGURE 1 - C**

n1

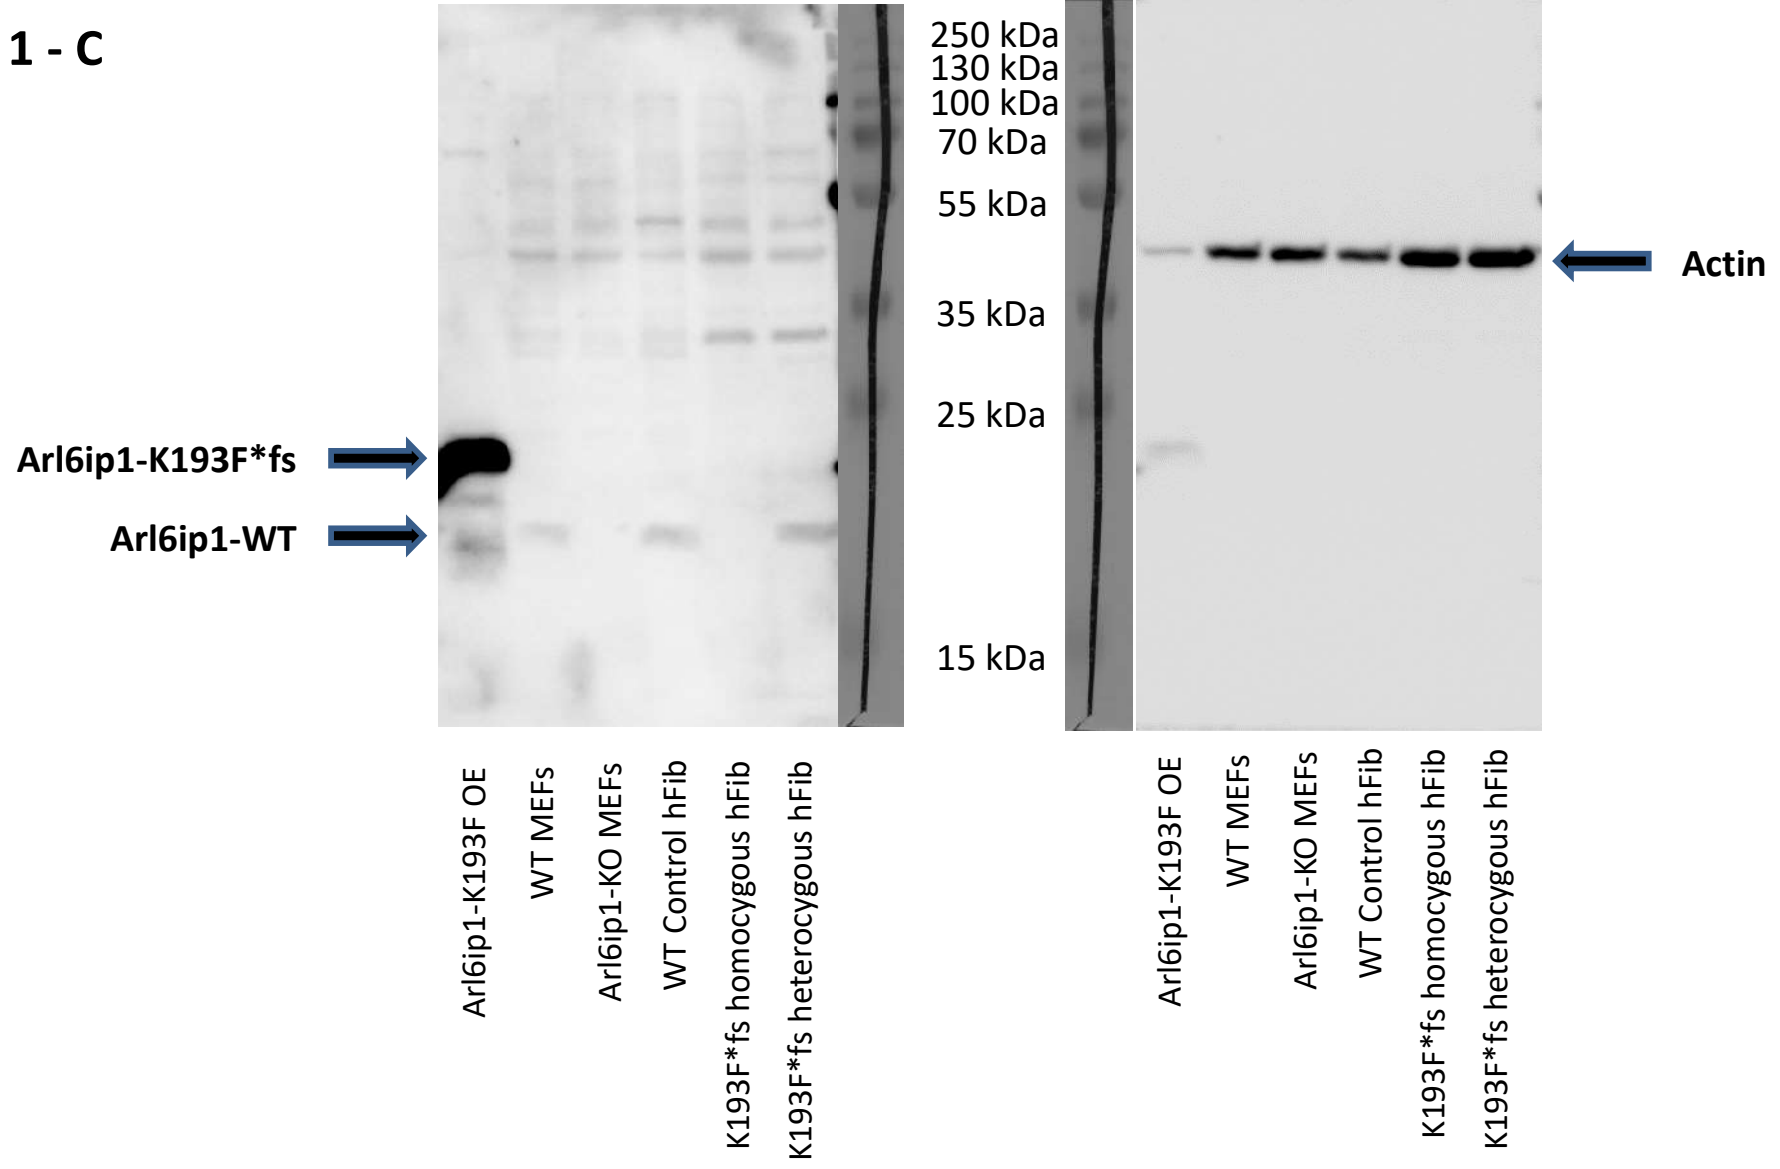

# FIGURE 1 - C

n2

Arl6ip1-K193F\*fs

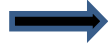

Arl6ip1-WT

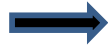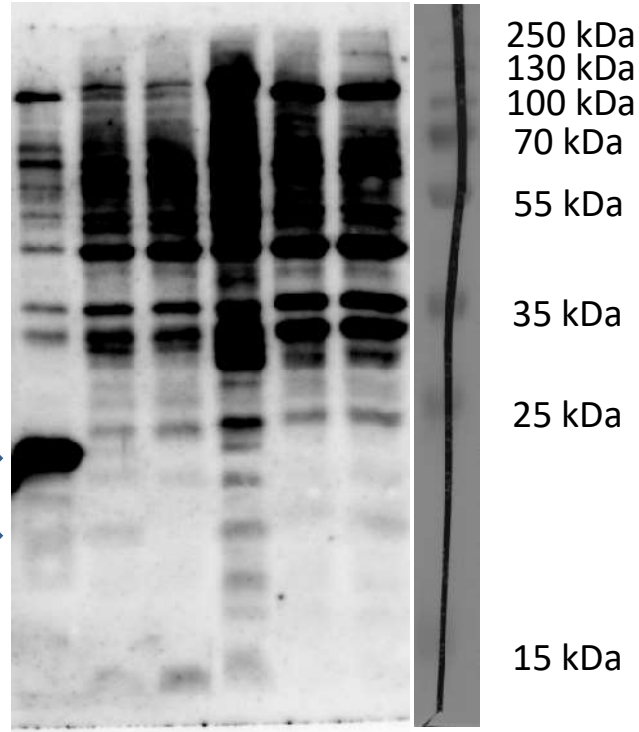

Arl6ip1-K193F OE

WT MEFs

Arl6ip1-KO MEFs

WT Control hFib

K193F\*fs homocycous hFib

K193F\*fs heterocycous hFib

250 kDa  
130 kDa  
100 kDa  
70 kDa  
55 kDa  
35 kDa  
25 kDa  
15 kDa

**FIGURE 1 - F**

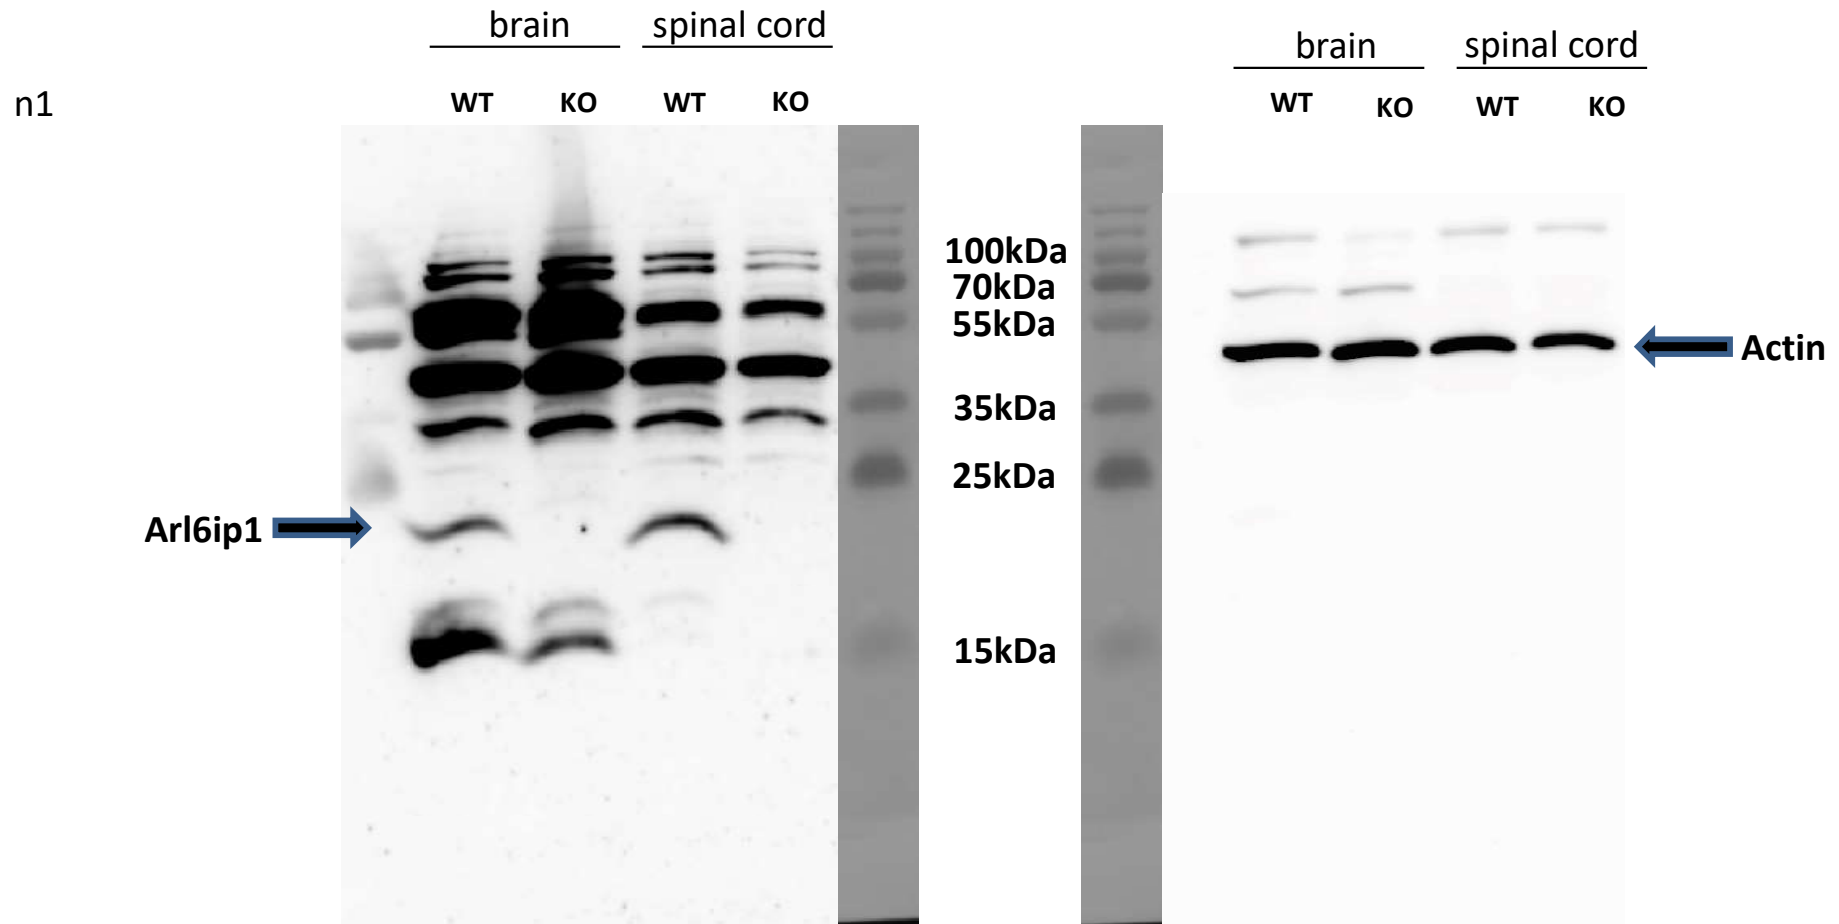

**FIGURE 1 - F**

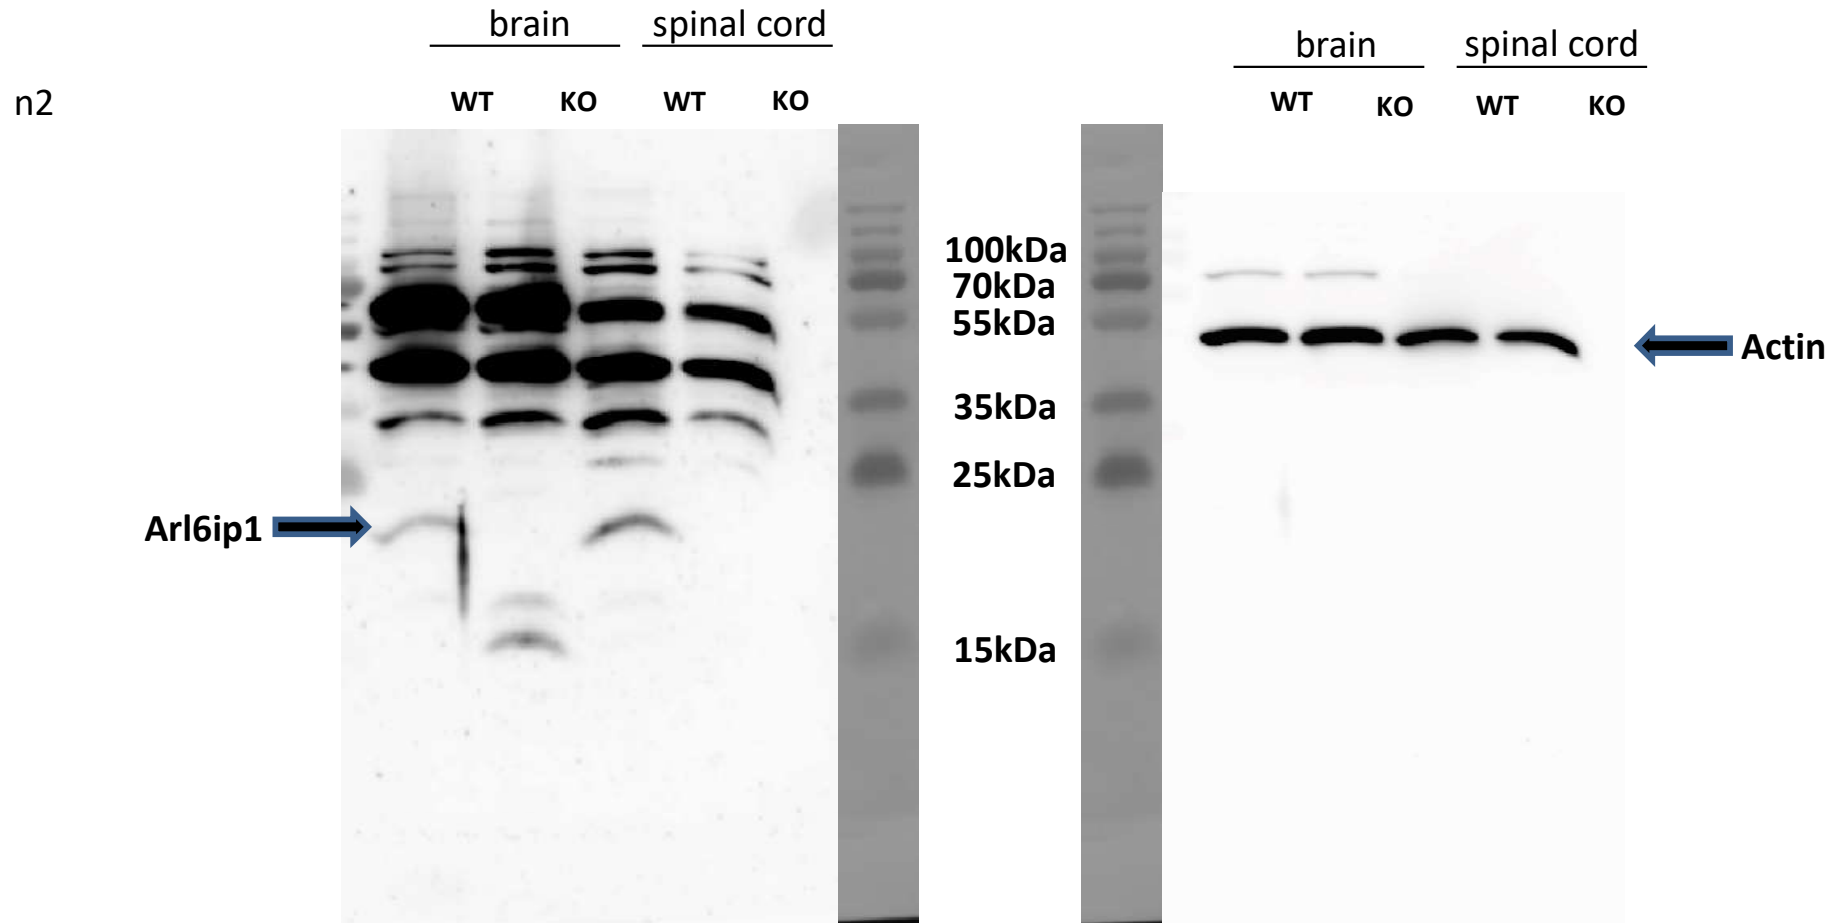

# FIG 2. C

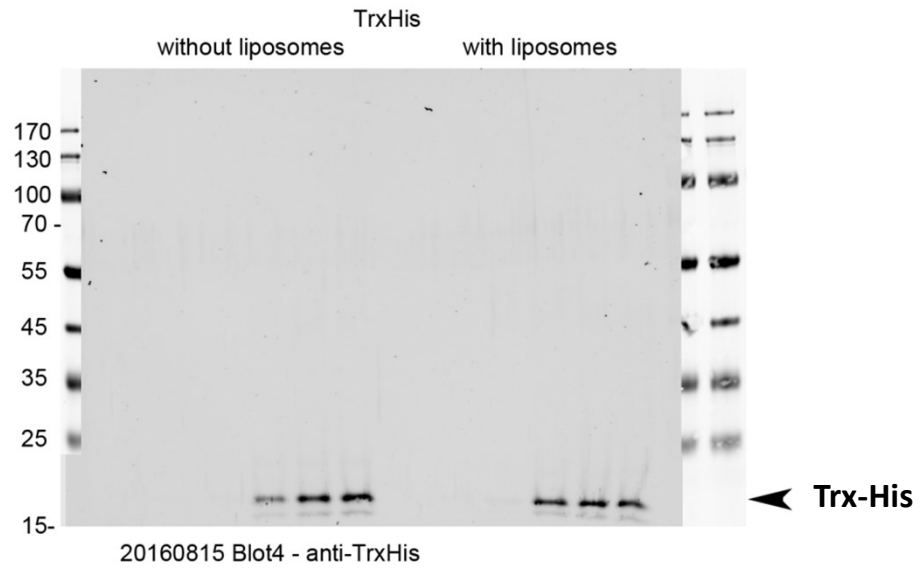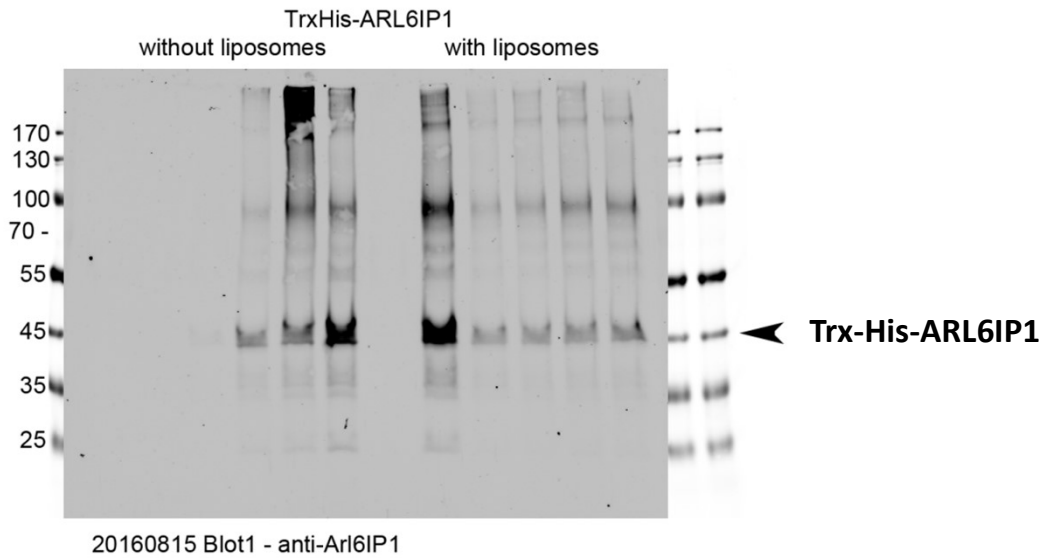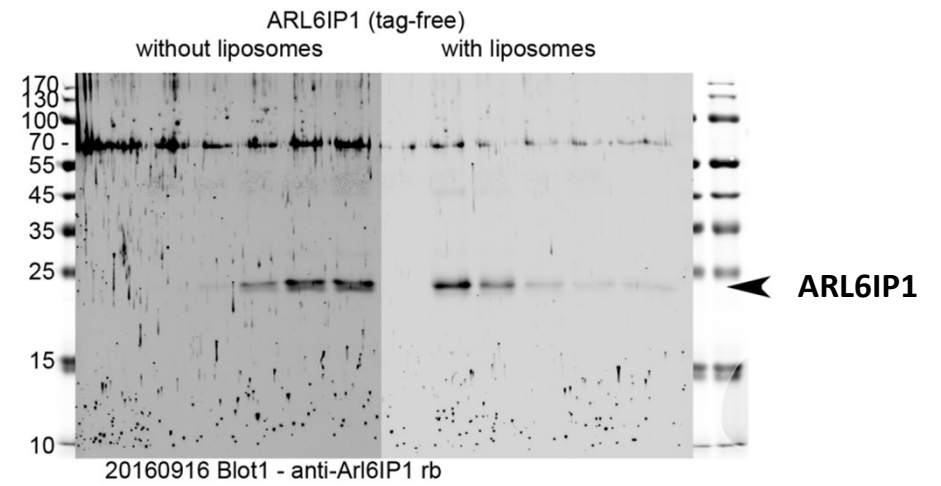

# FIG 2. E

## INPUT

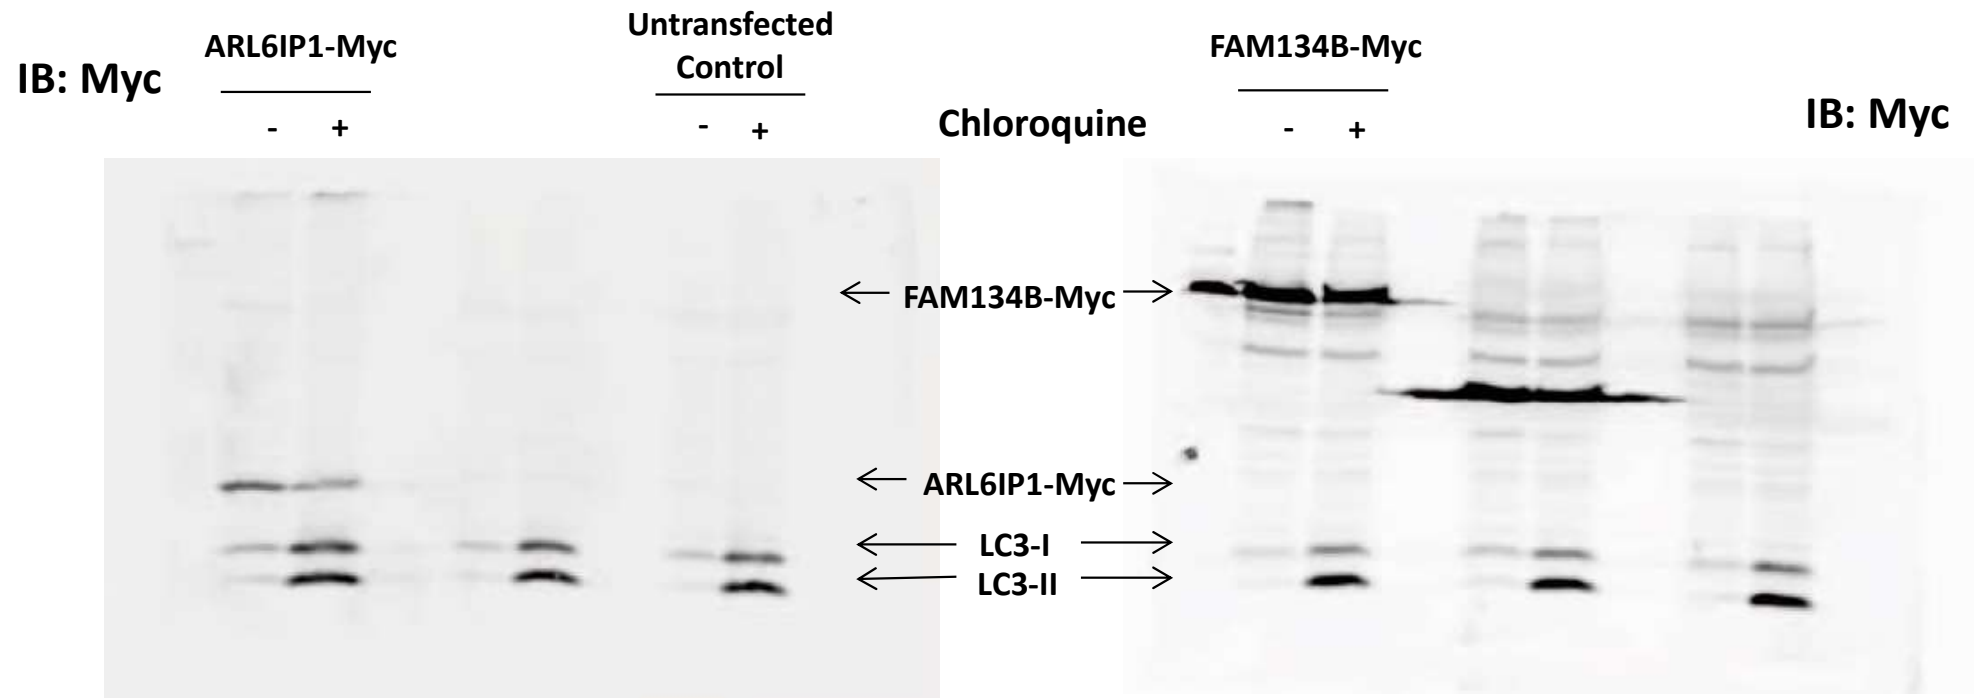

# FIG 2. E

## IP Myc

IB: Myc

ARL6IP1-Myc

Untransfected  
Control

High  
exposure

- +

- +

Chloroquine

FAM134B-Myc

IB: Myc

High  
exposure

- +

Low  
exposure

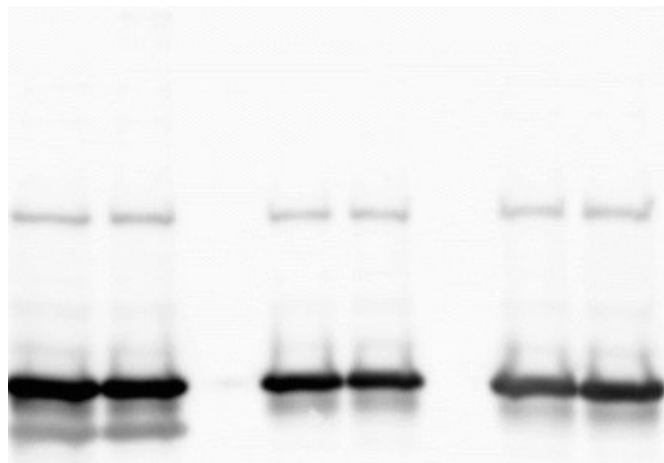

← LC3-II →

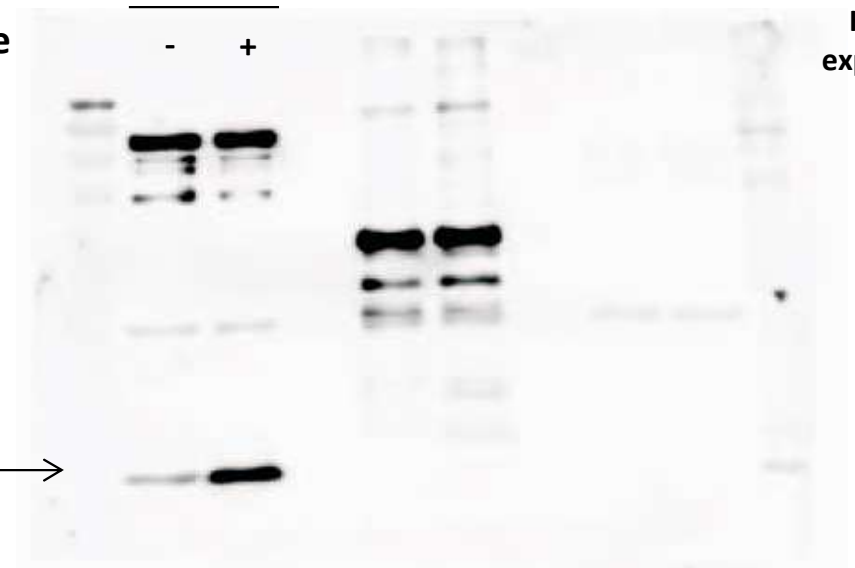

Low  
exposure

← FAM134B-Myc →

← IgG Light chains →

← ARL6IP1-Myc →

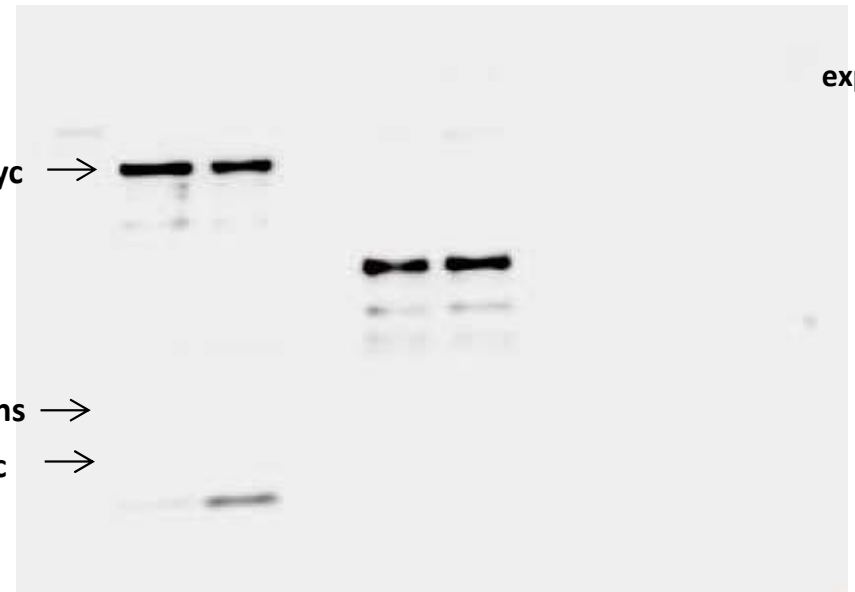



**FIG 2. G**

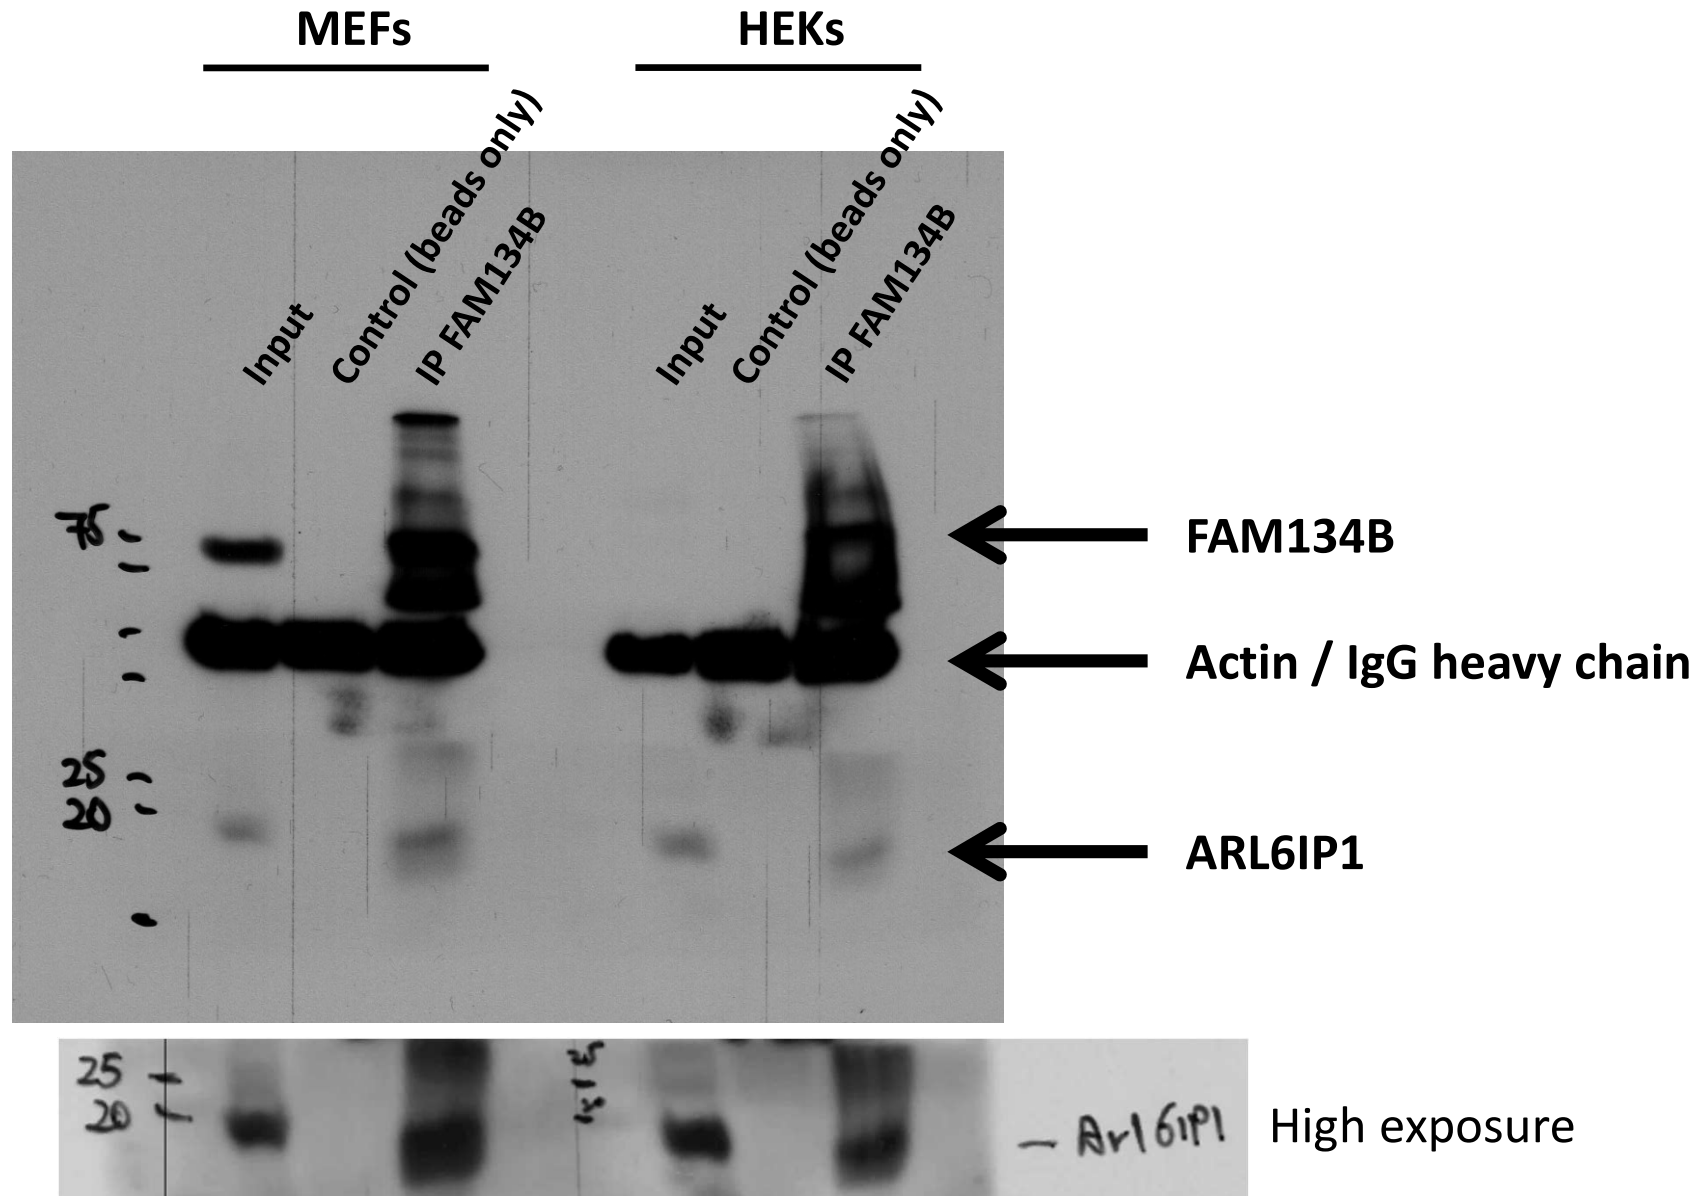

# FIG 4. C

IB: anti HA

Low Exposure

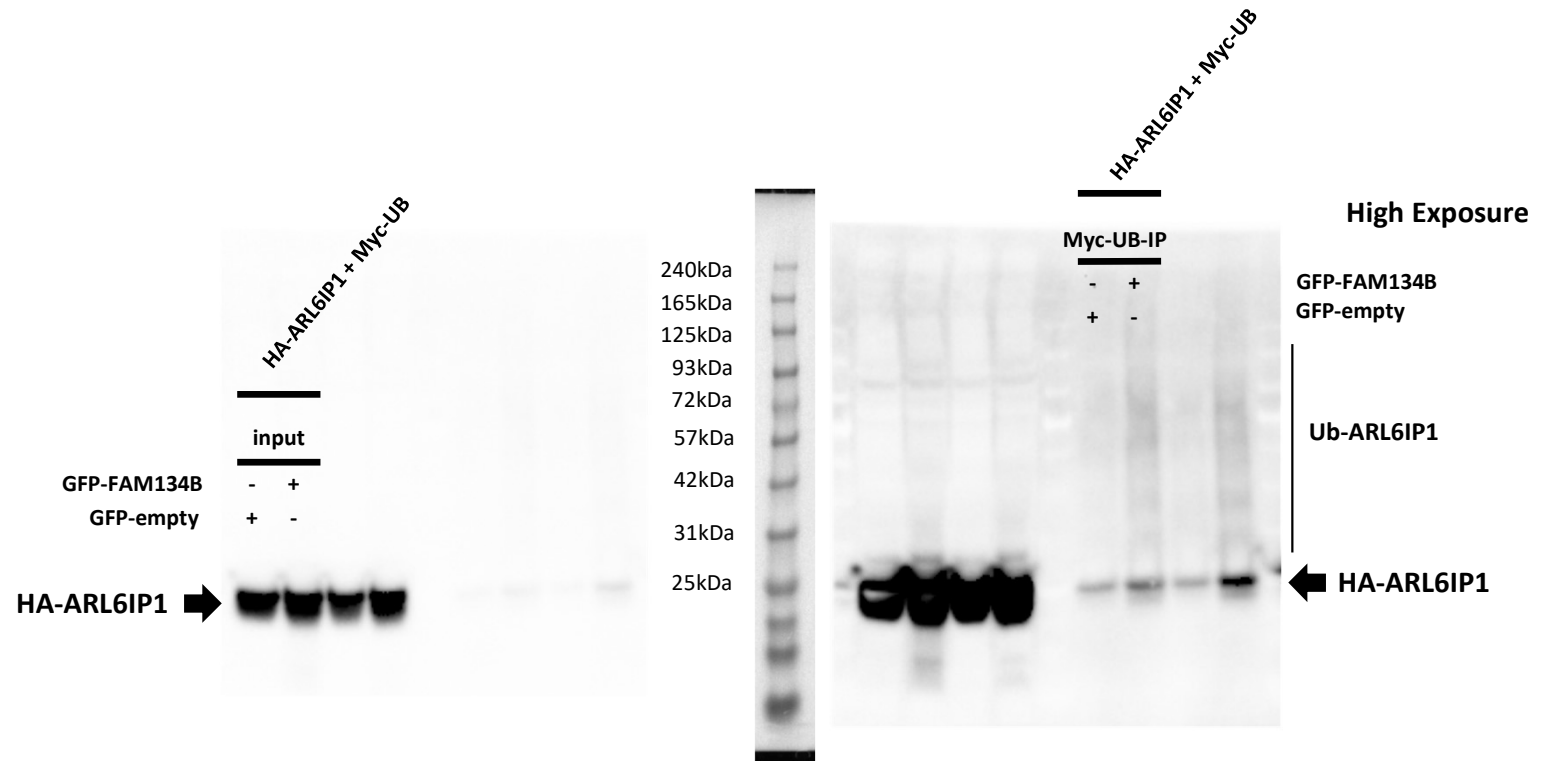

IB: anti GFP

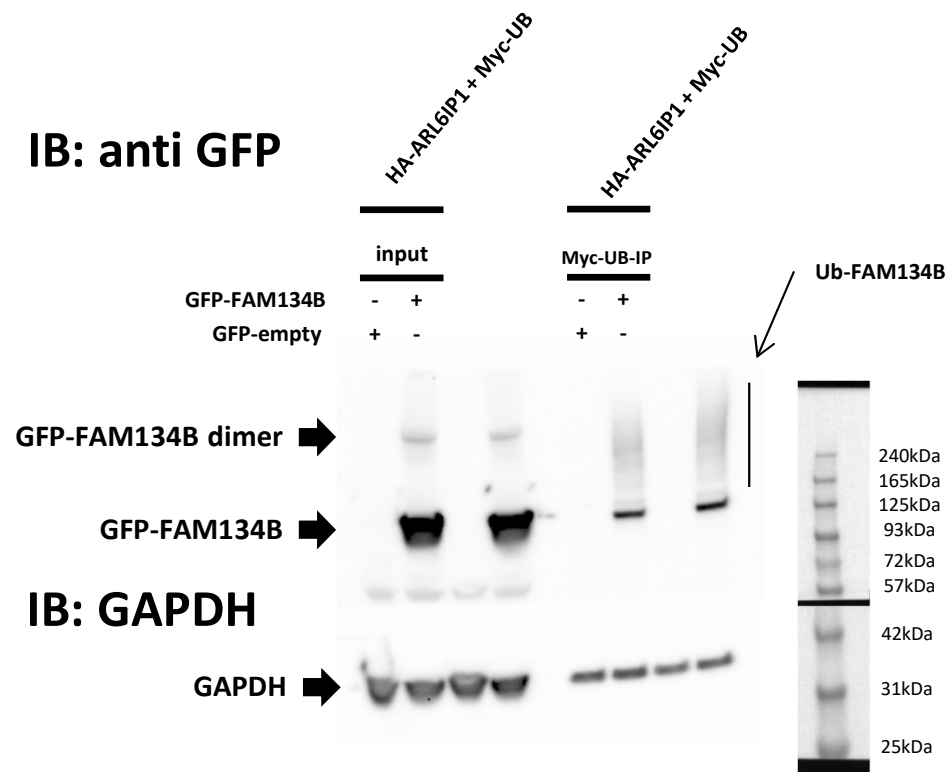

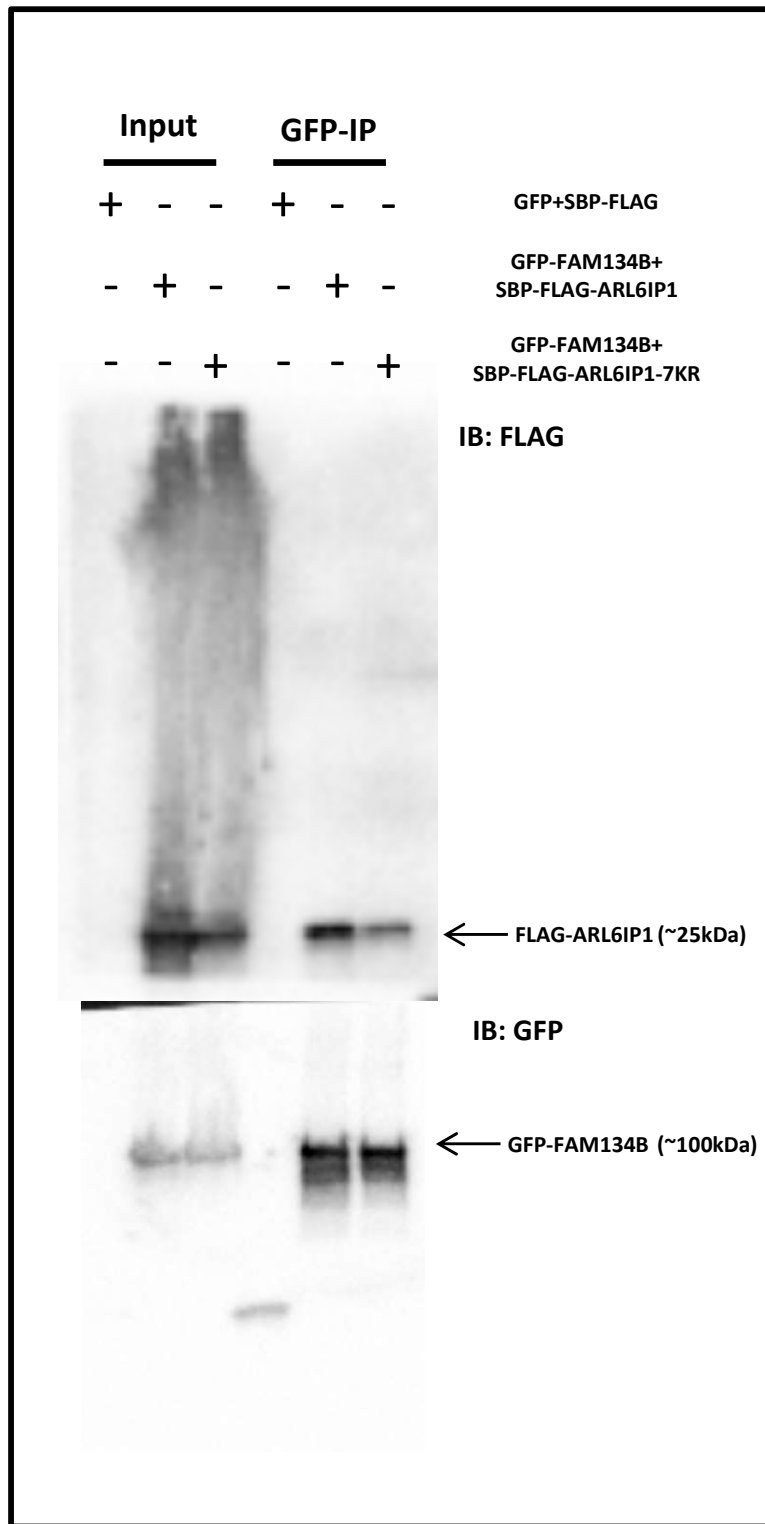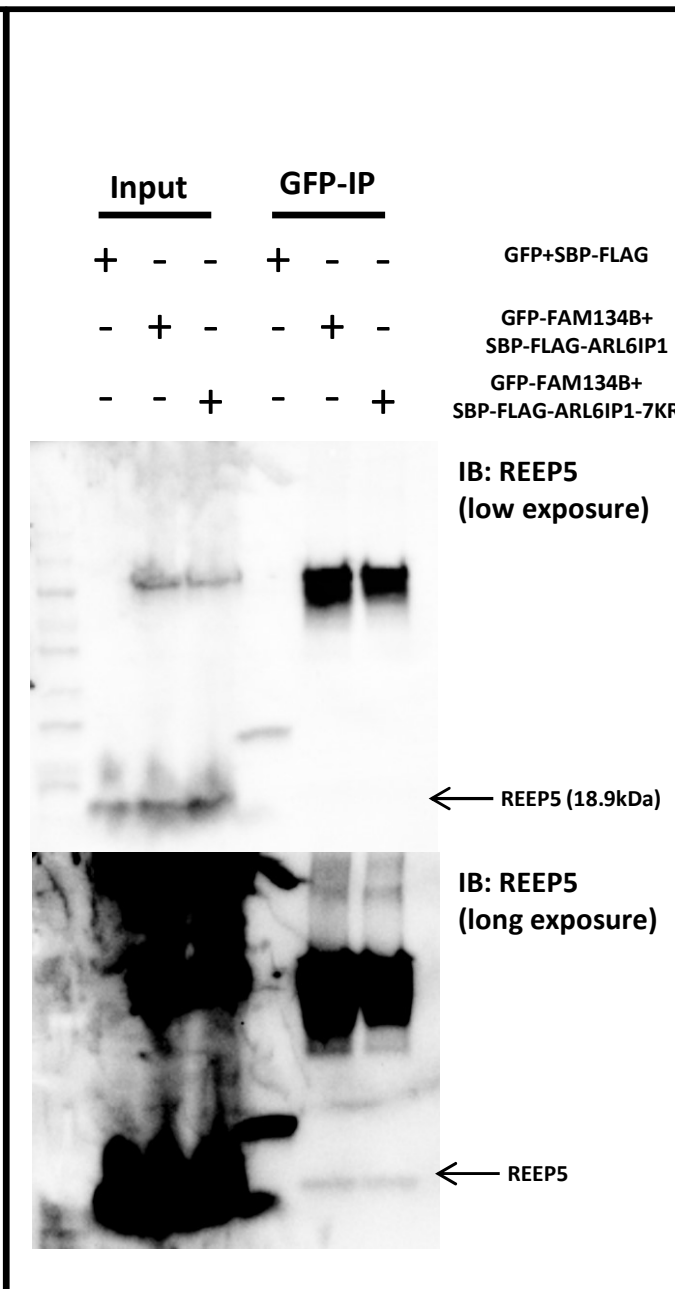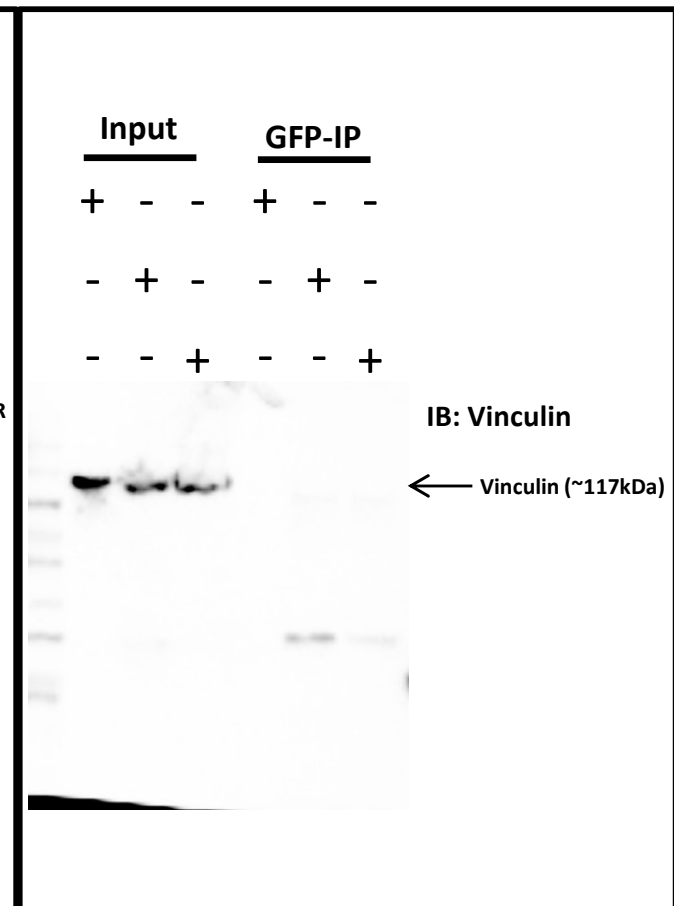

**FIG 4. E**

n=1

# FIG 4. E

n=2

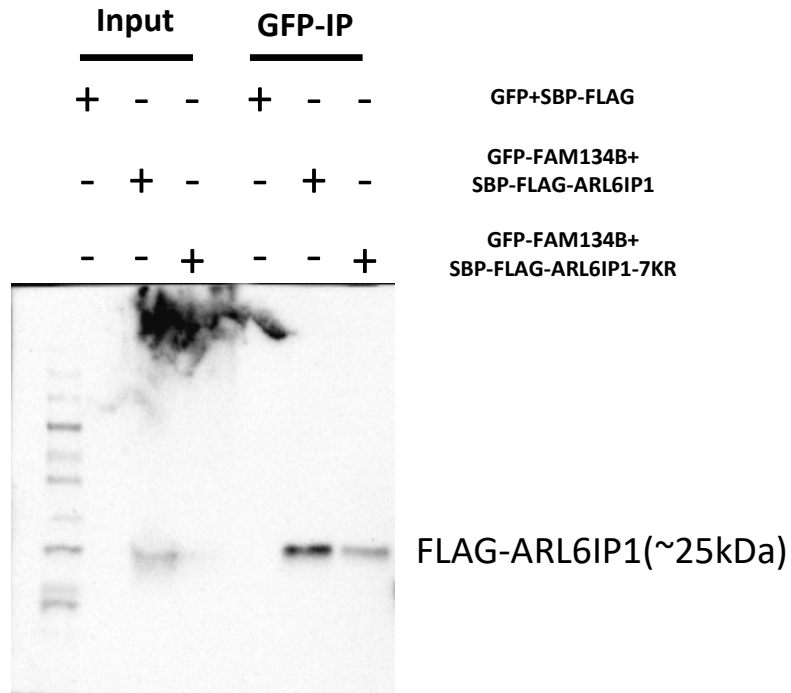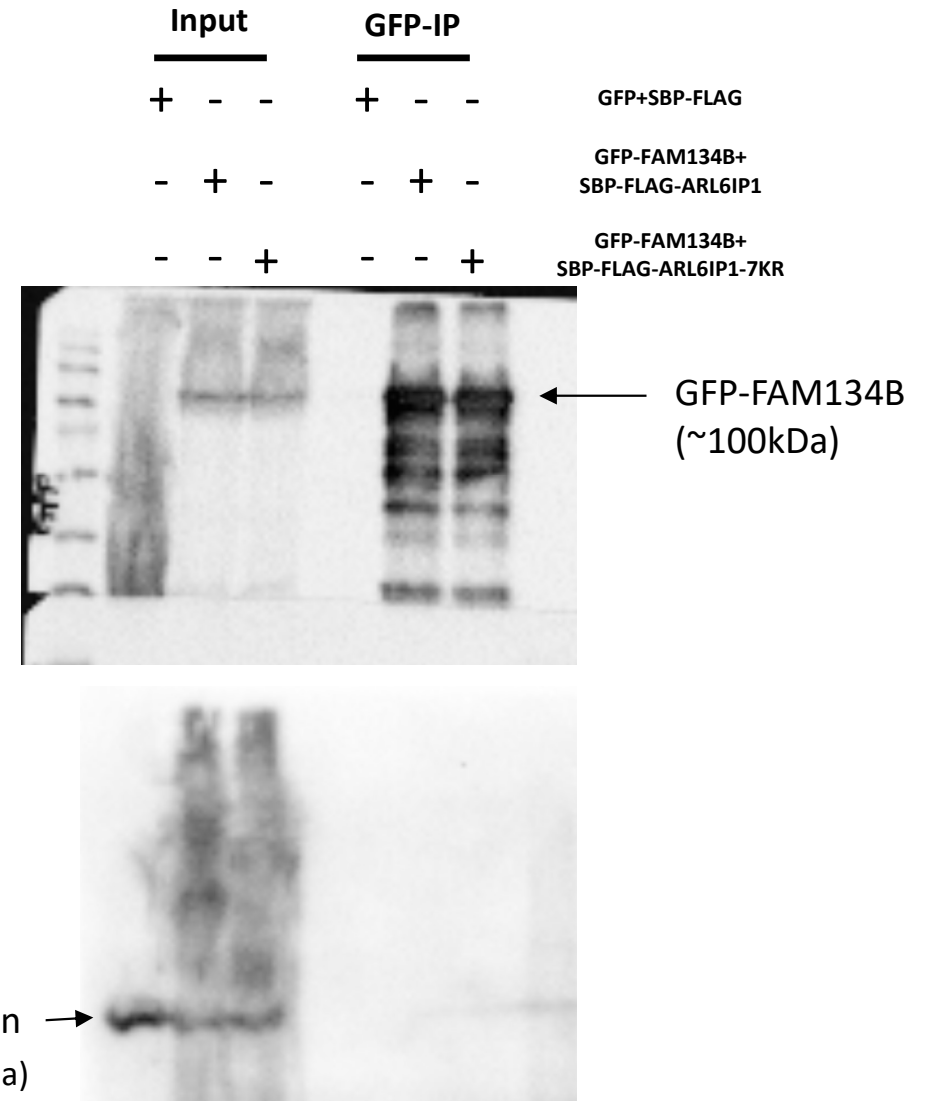

**FIG 4. G**

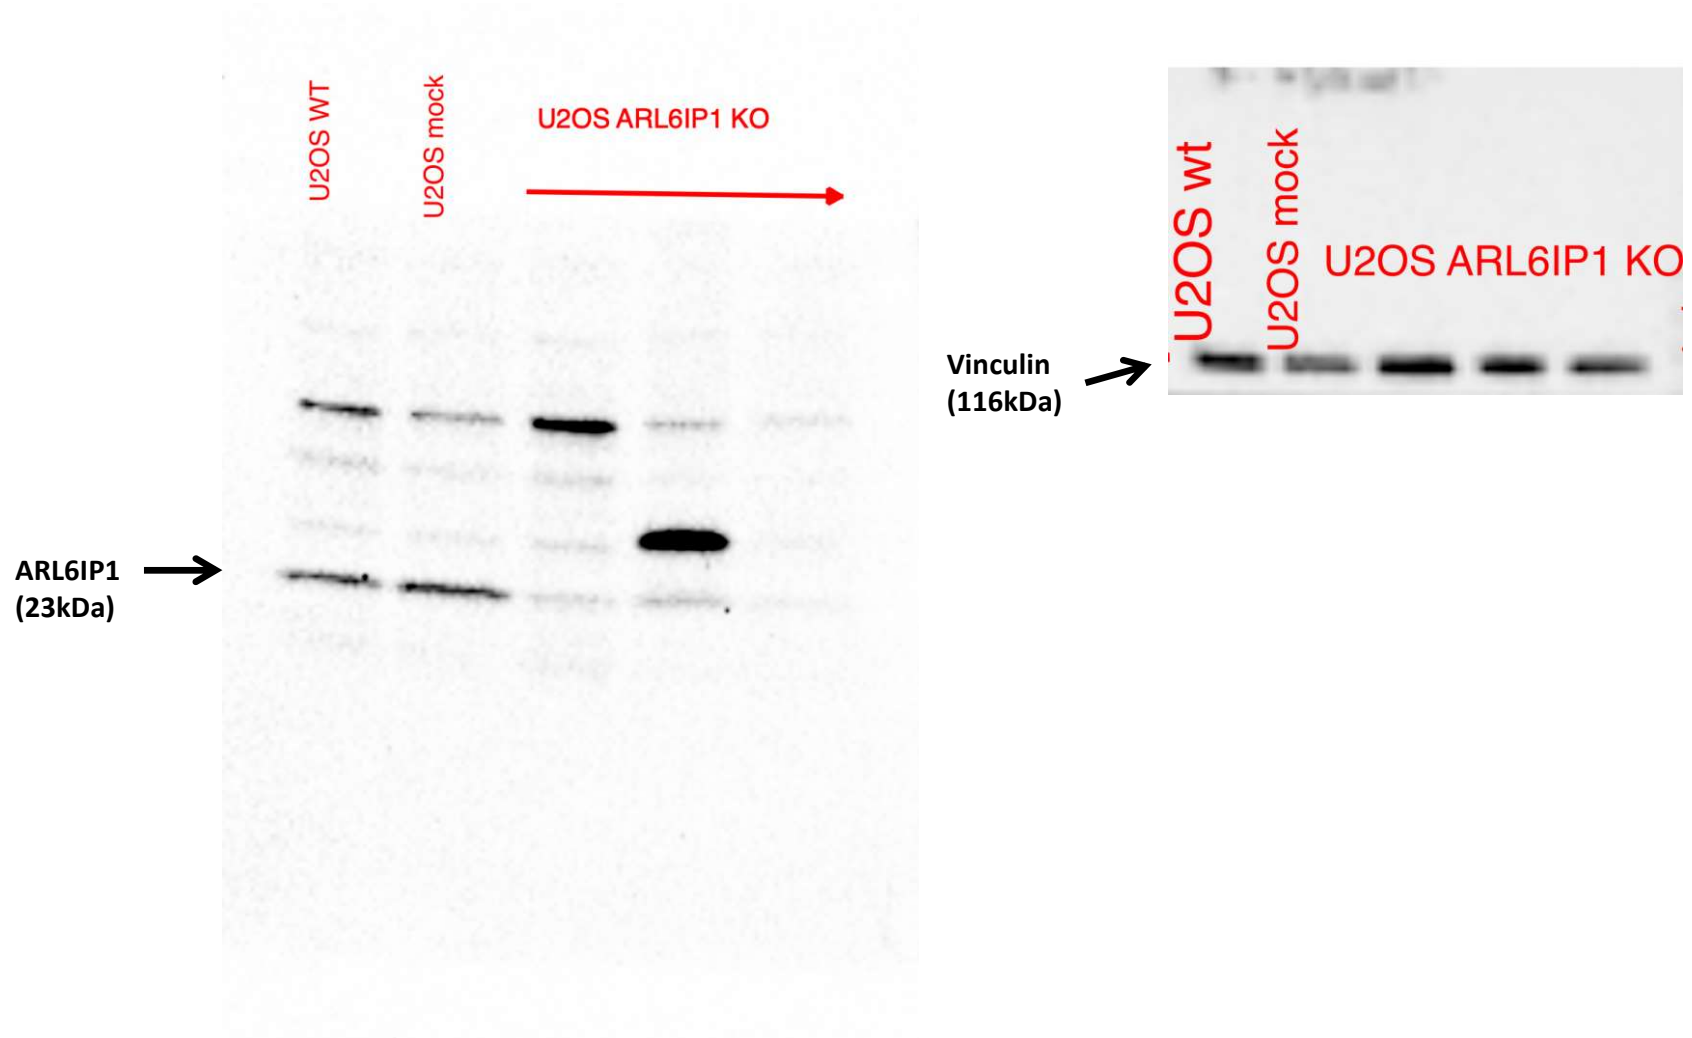

# FIG 4. H

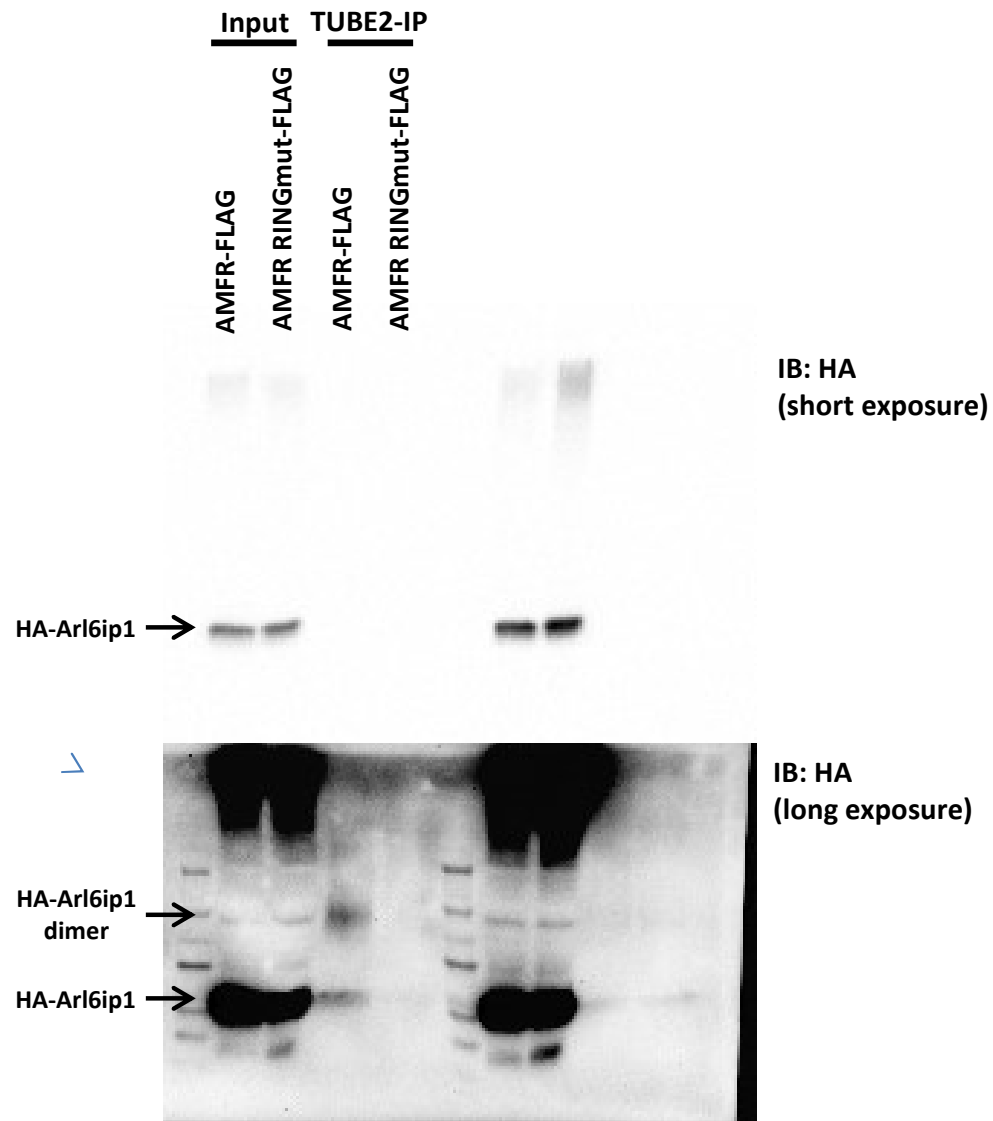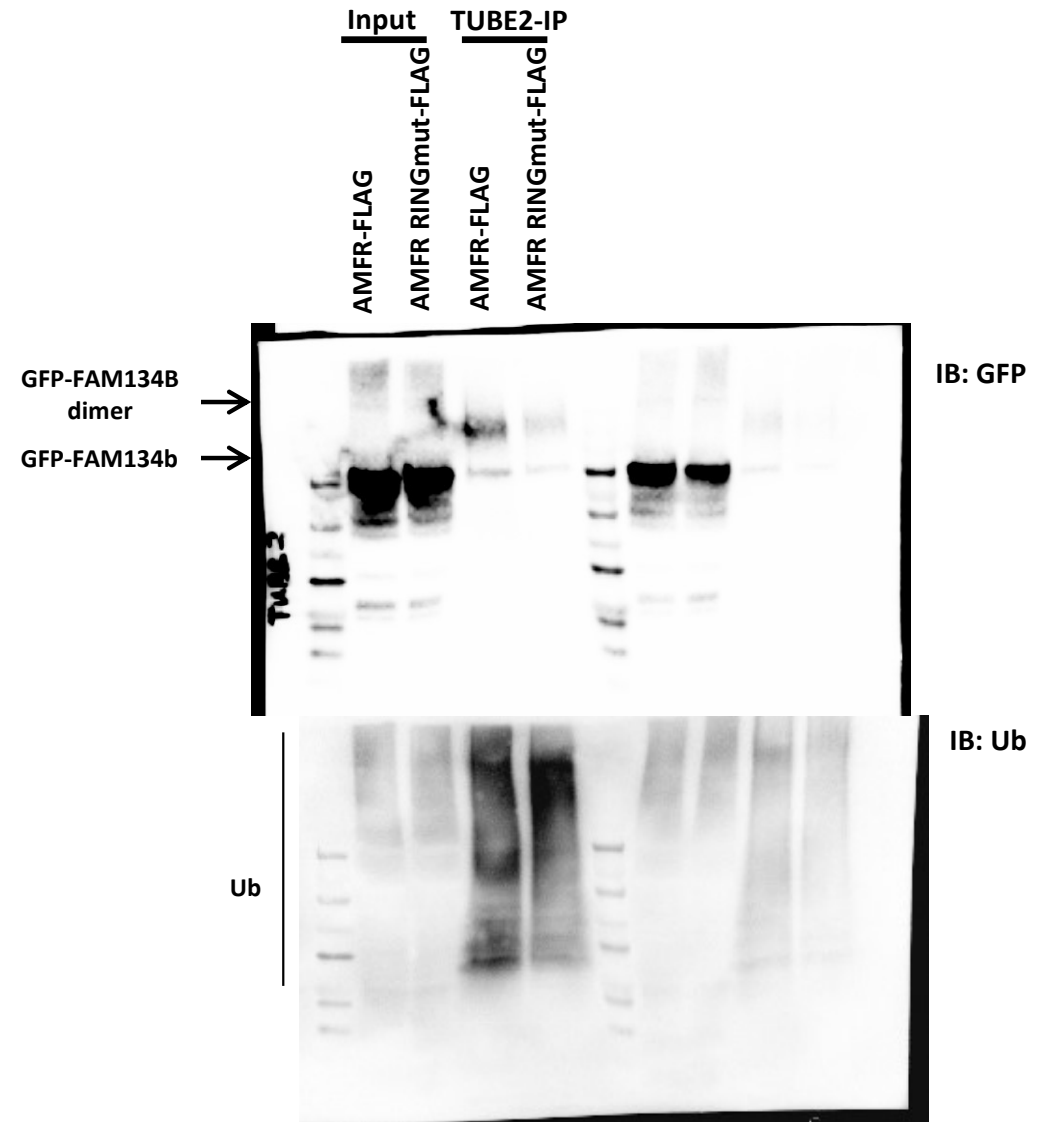

# FIG 4. H

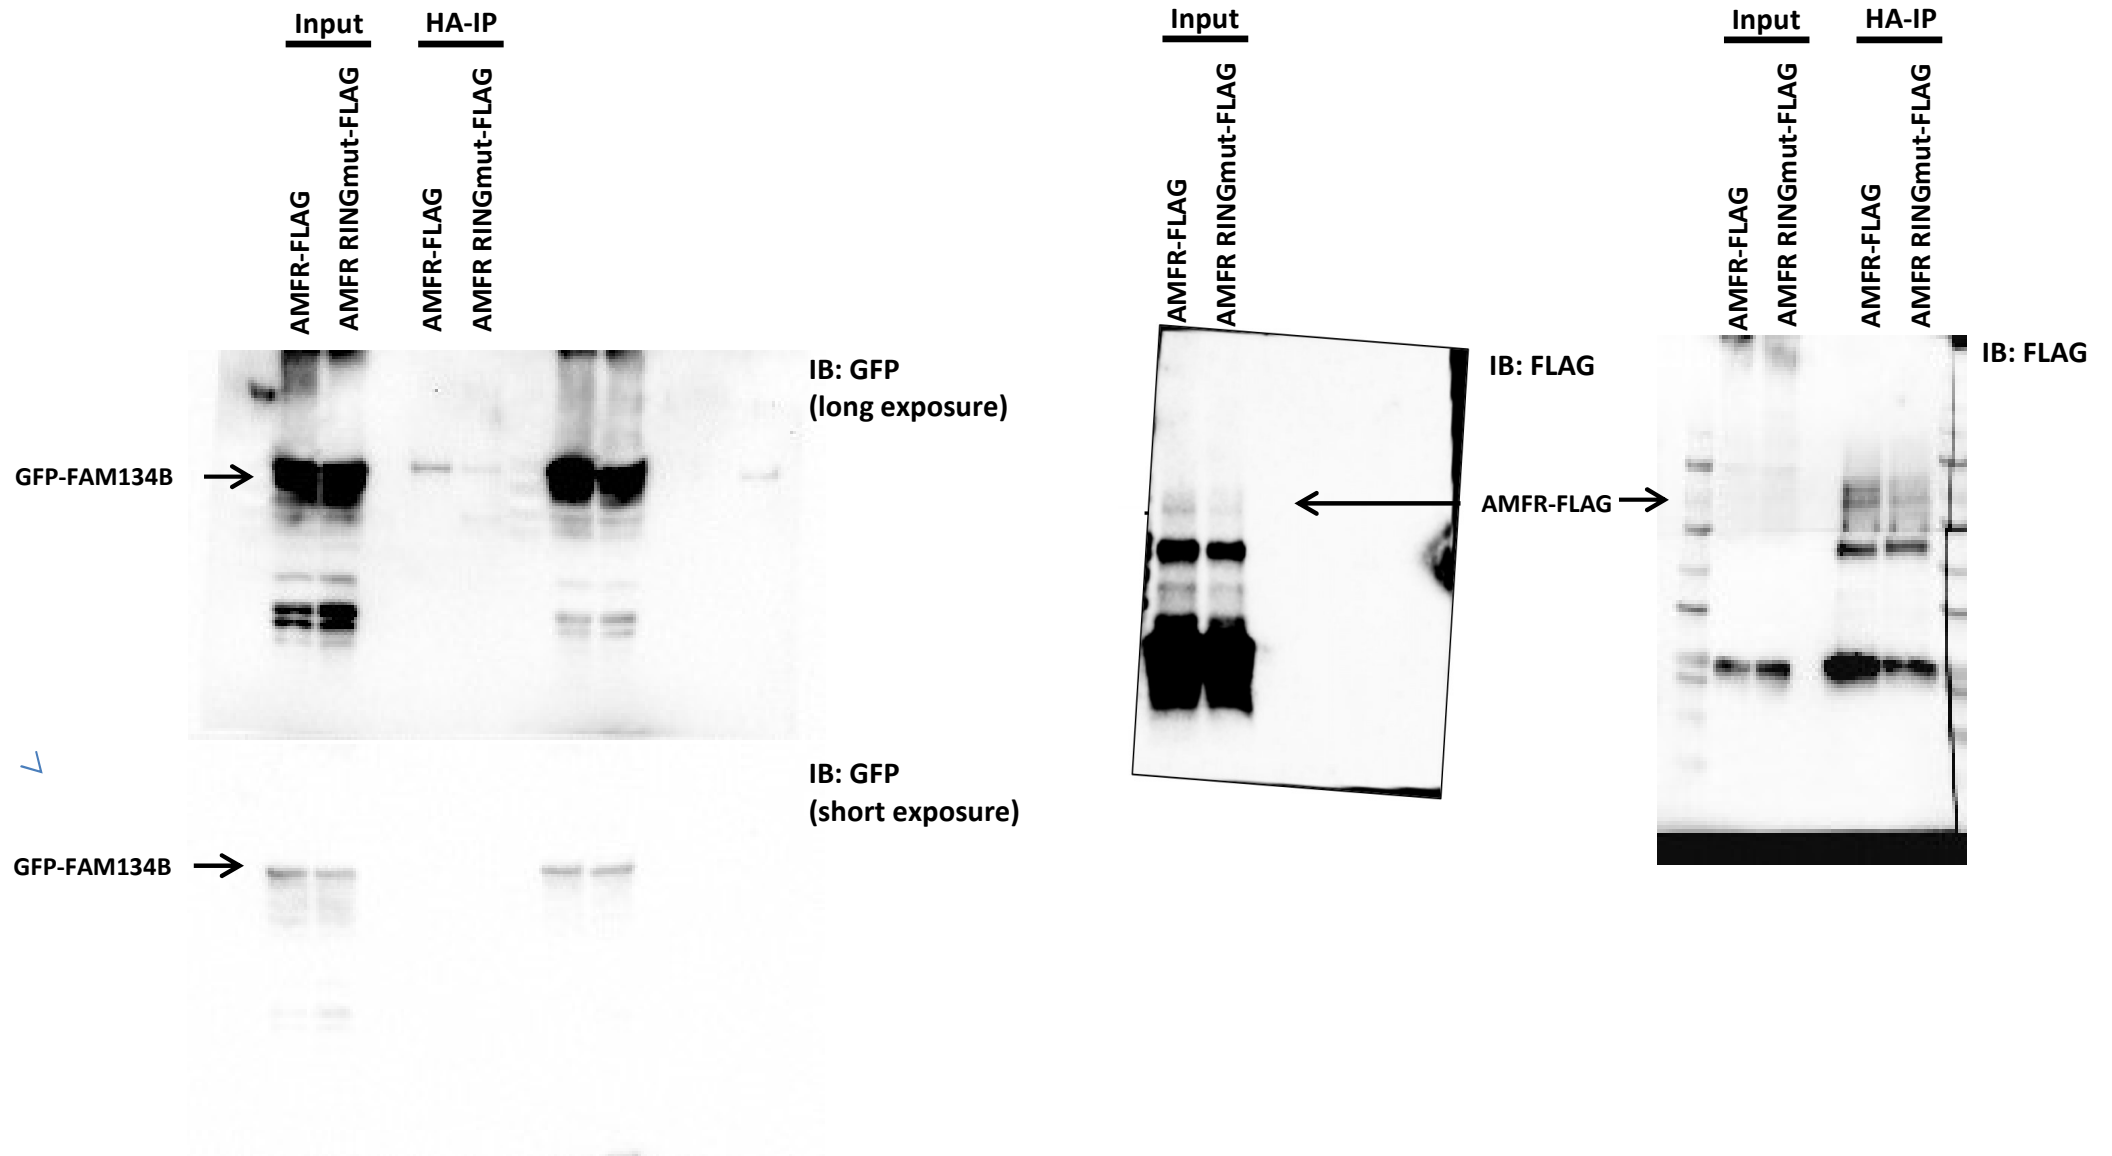

# FIG 4. H

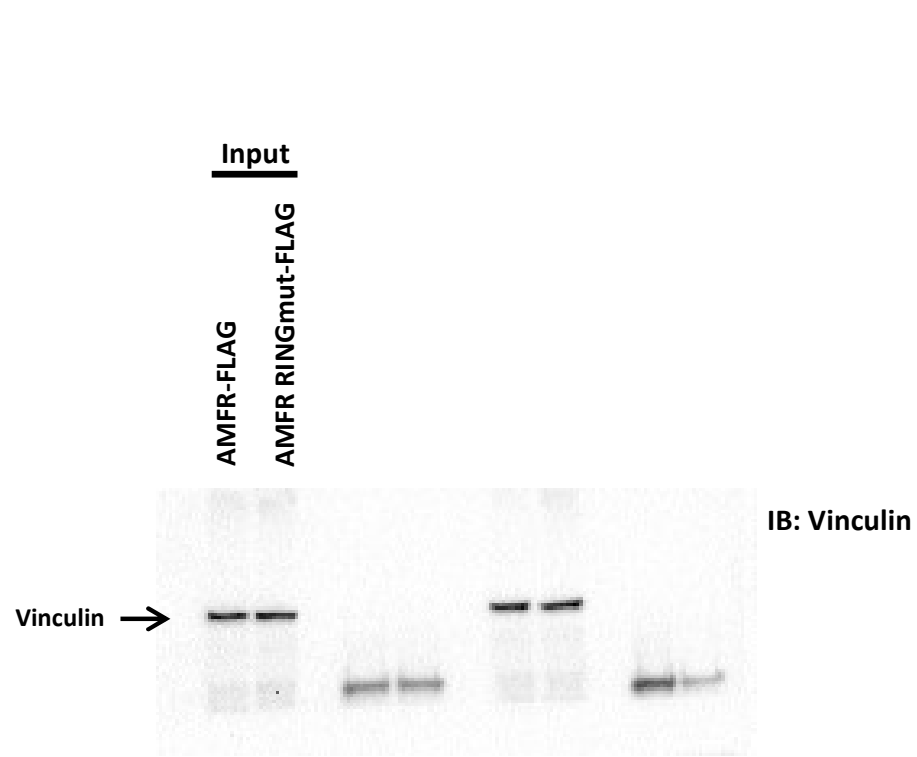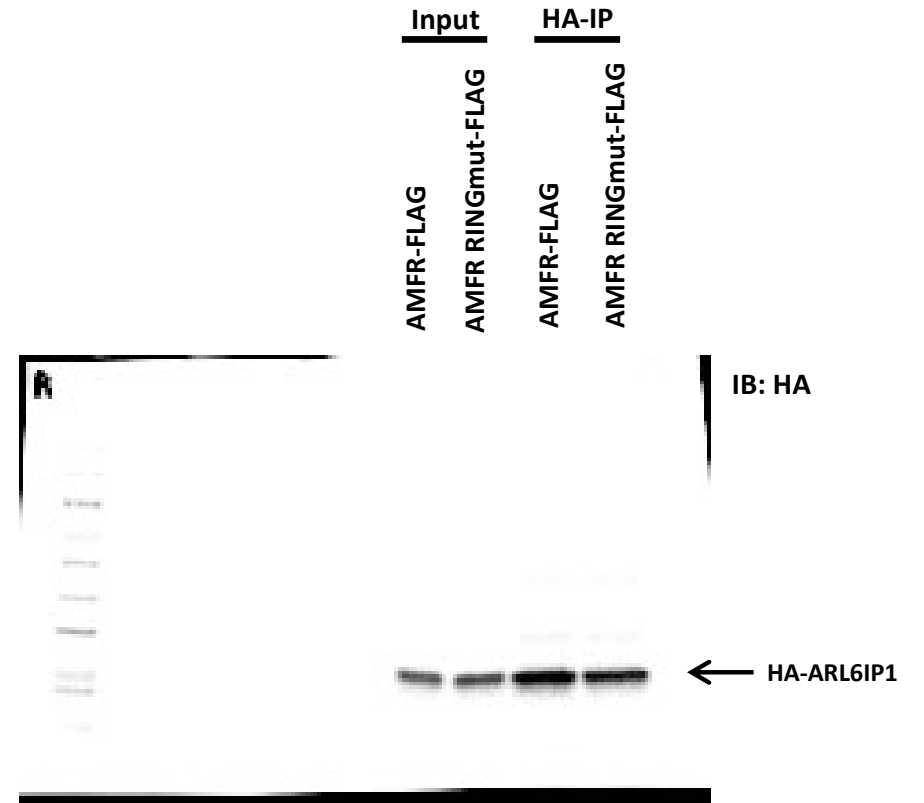



**Myc-Ub + HA-ARL6IP1**

**Input**      **Myc-IP**

AMFR-FLAG  
AMFR RINGmut-FLAG

AMFR-FLAG  
AMFR RINGmut-FLAG

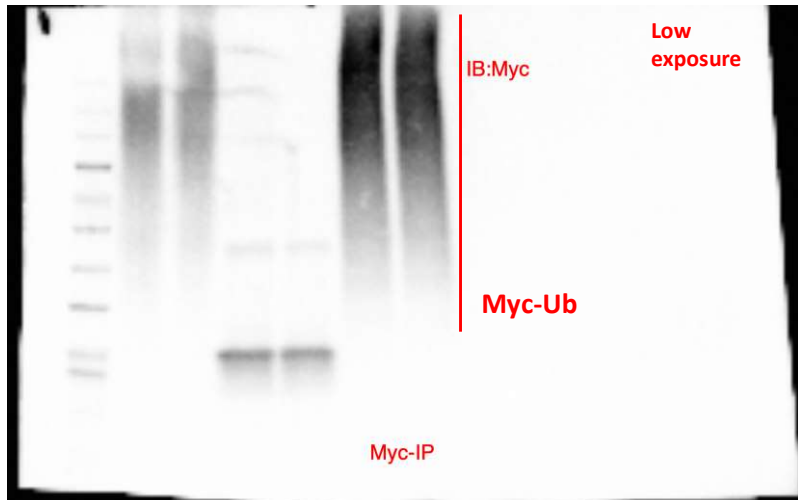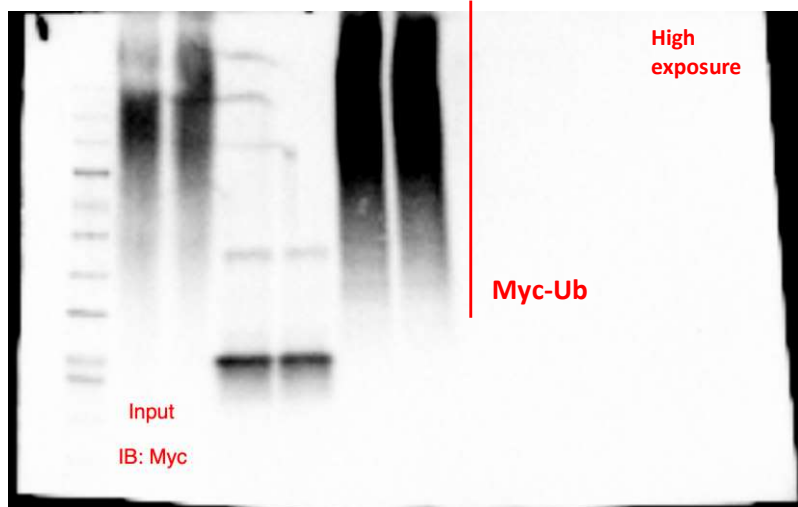

**Myc-Ub + HA-ARL6IP1**

**Input**      **Myc-IP**

AMFR-FLAG  
AMFR RINGmut-FLAG

AMFR-FLAG  
AMFR RINGmut-FLAG

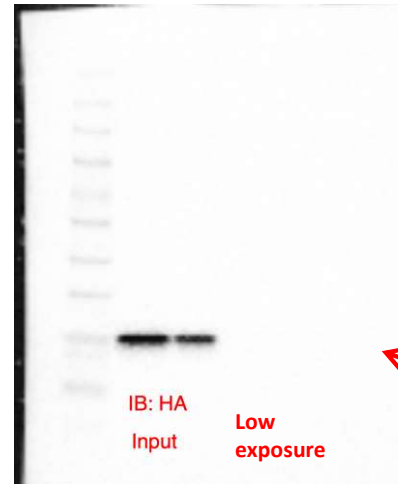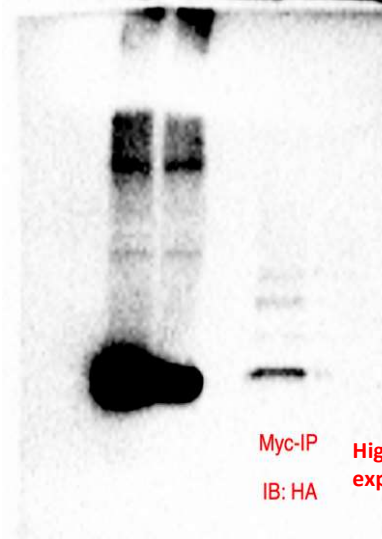

**Myc-Ub + HA-ARL6IP1**

**Input**      **Myc-IP**

AMFR-FLAG  
AMFR RINGmut-FLAG

AMFR-FLAG  
AMFR RINGmut-FLAG

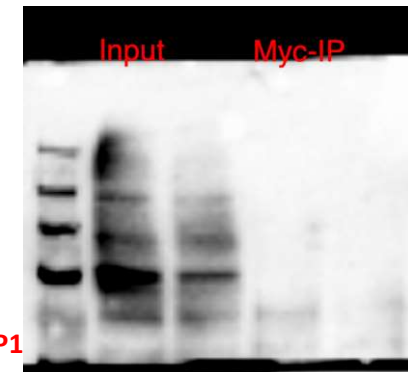

IB: FLAG

AMFR-FLAG  
(79kDa)

**FIG 4. I**

# GEL 1

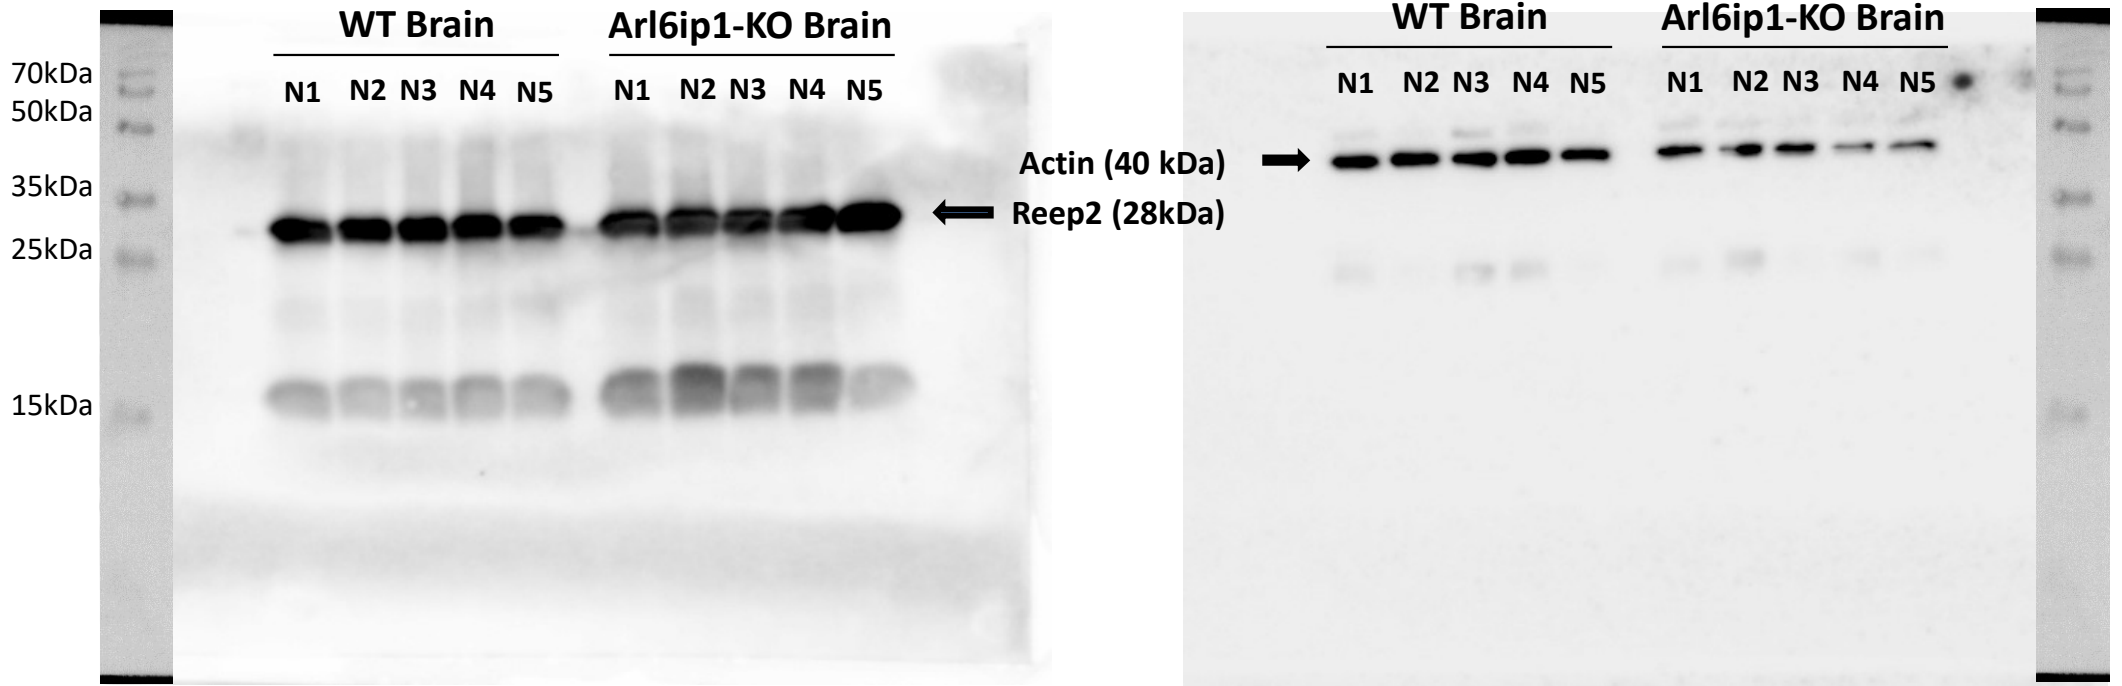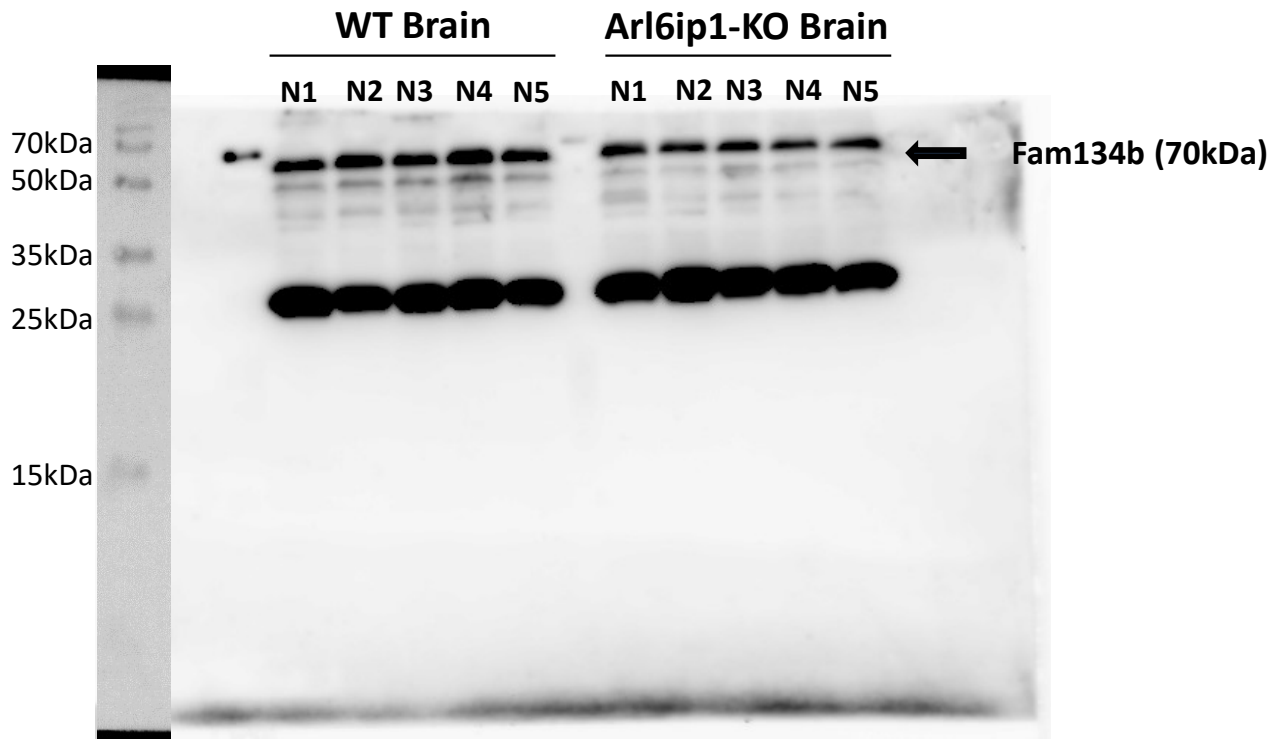

**EXT. FIG 1. I**

# GEL 2

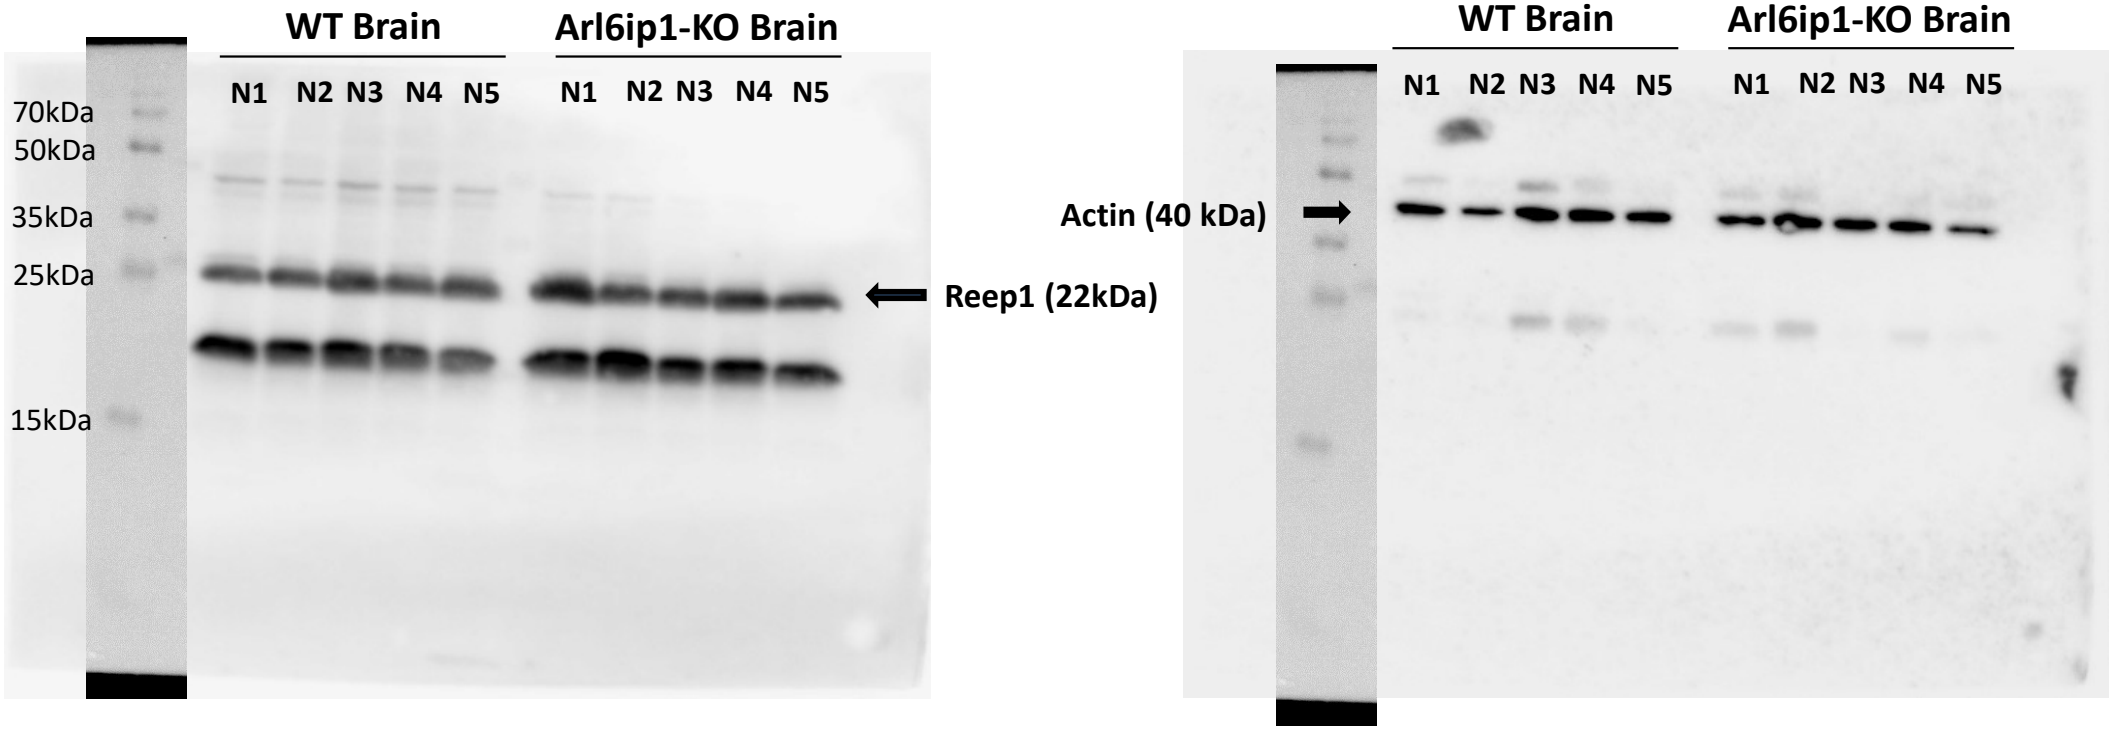

EXT. FIG 1. I

**GEL 3**

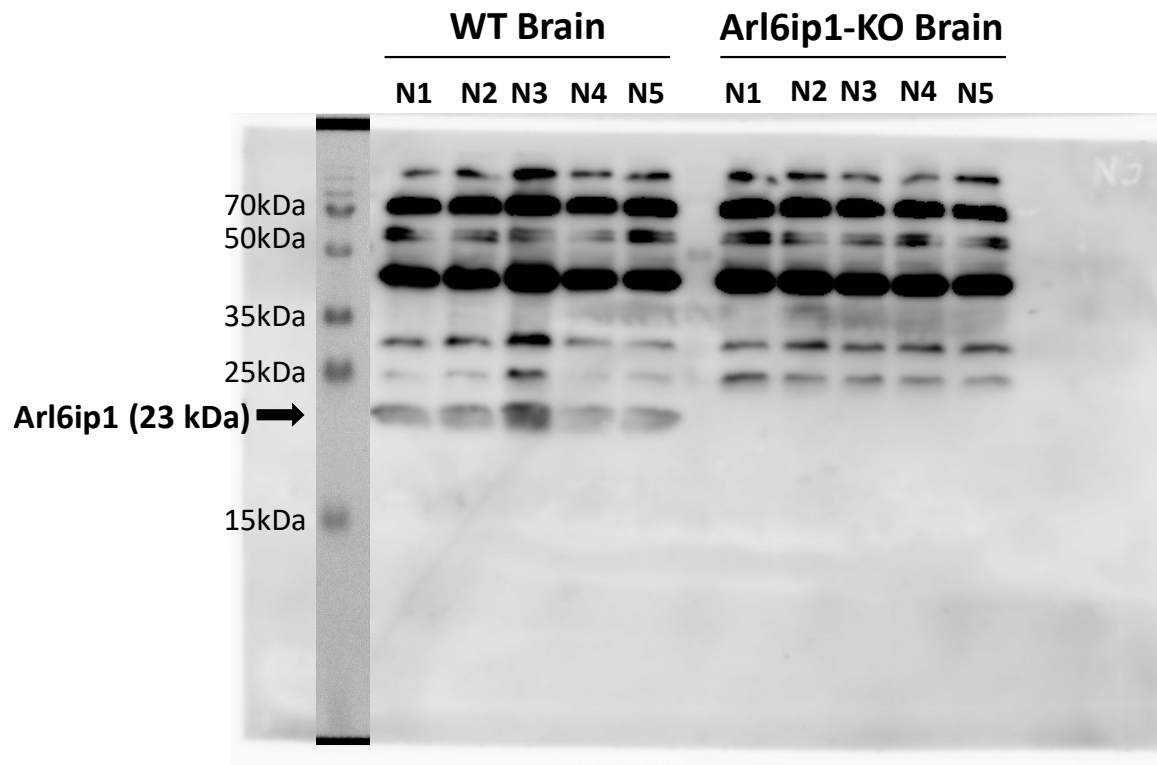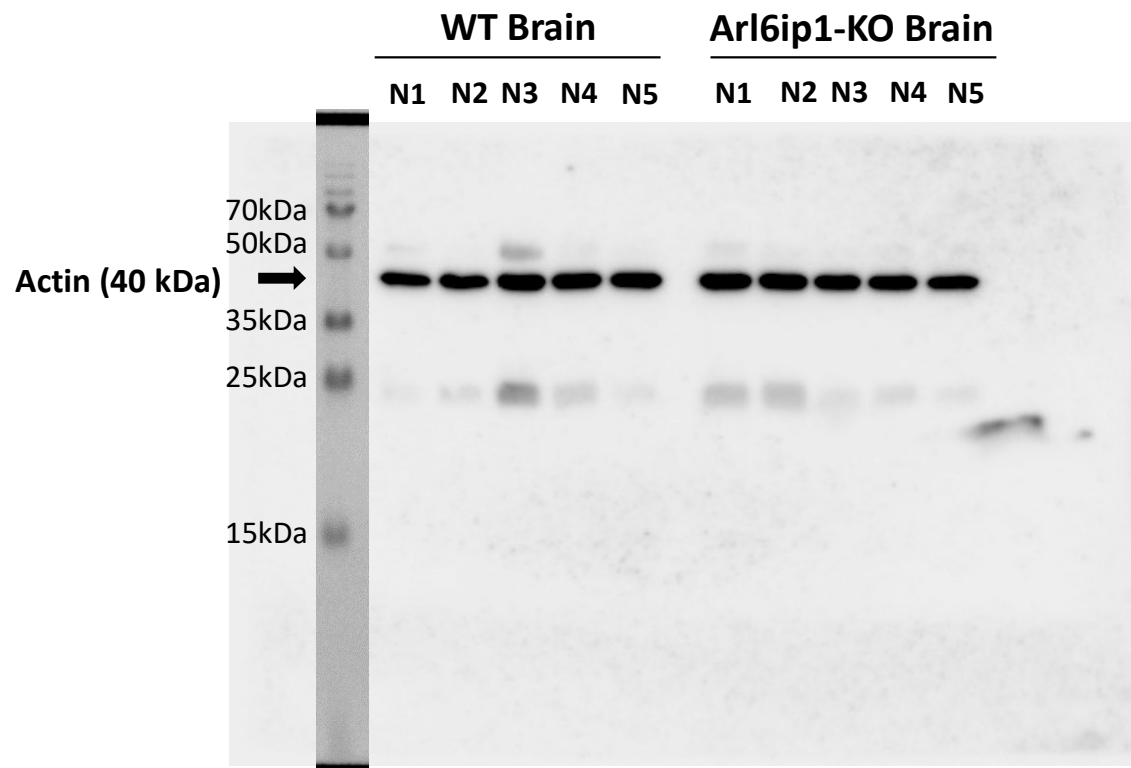

**EXT. FIG 1. I**

# GEL 4

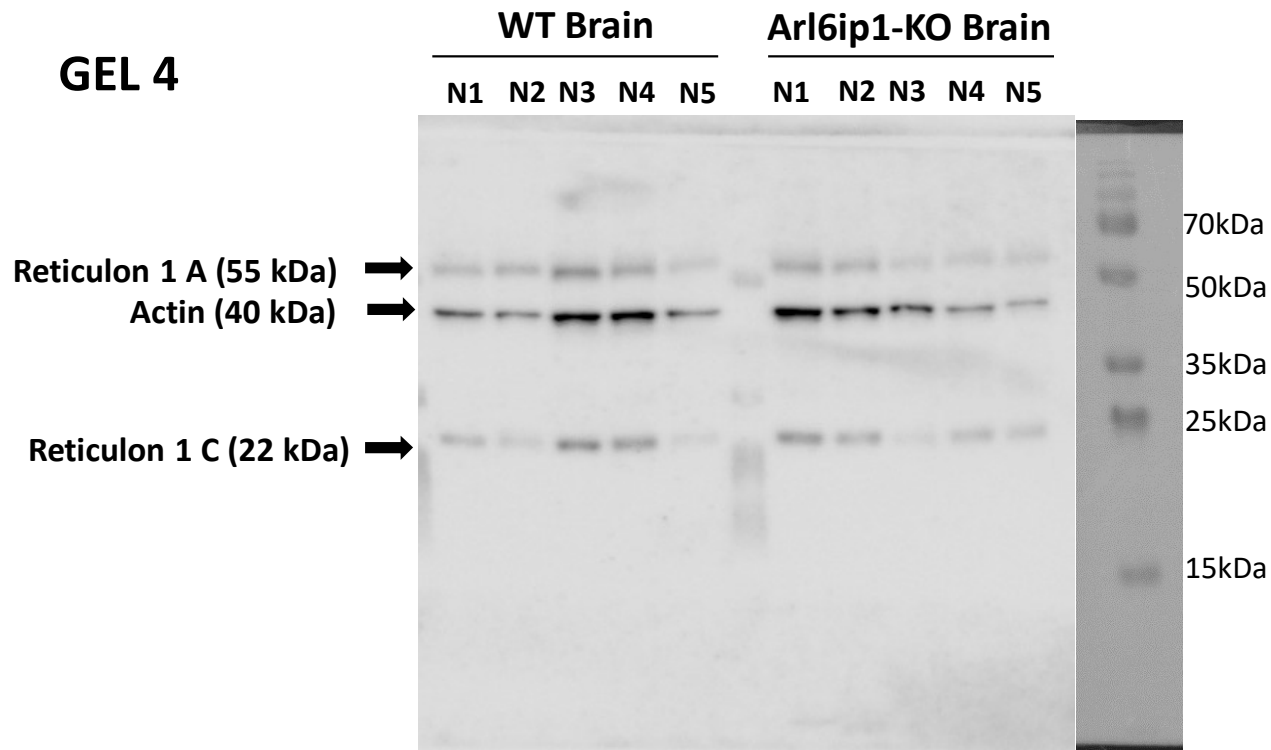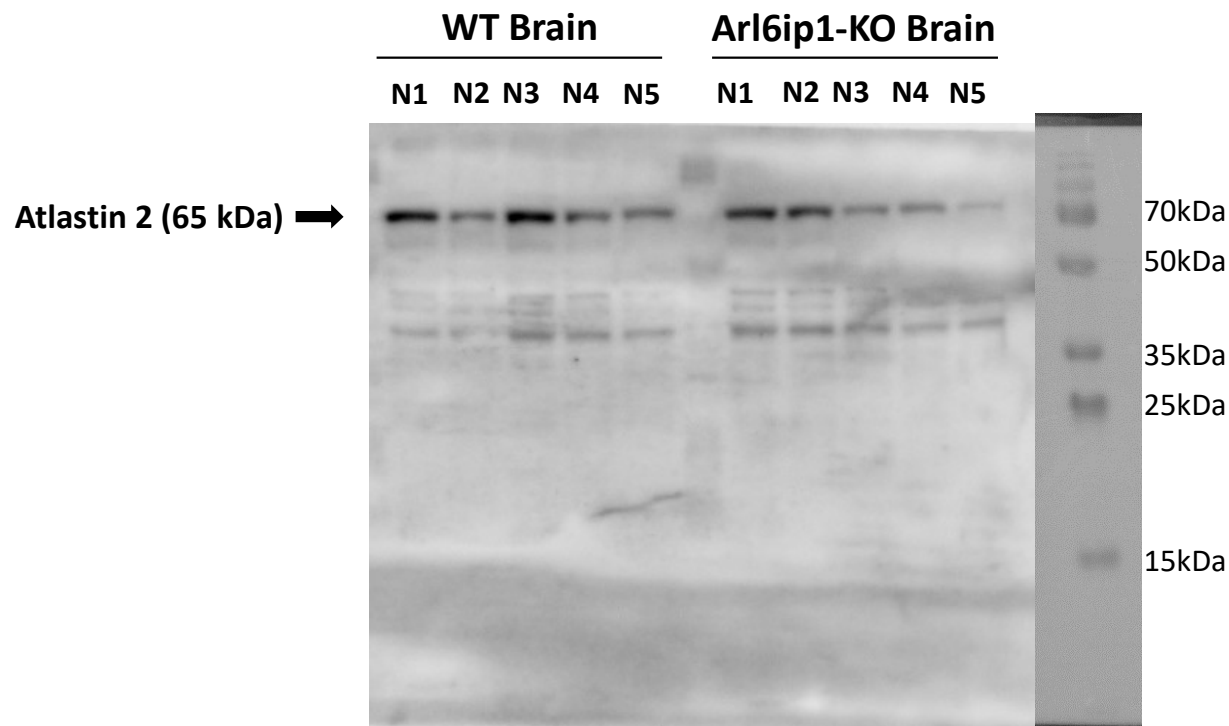

**EXT. FIG 1. I**

**GEL 5**

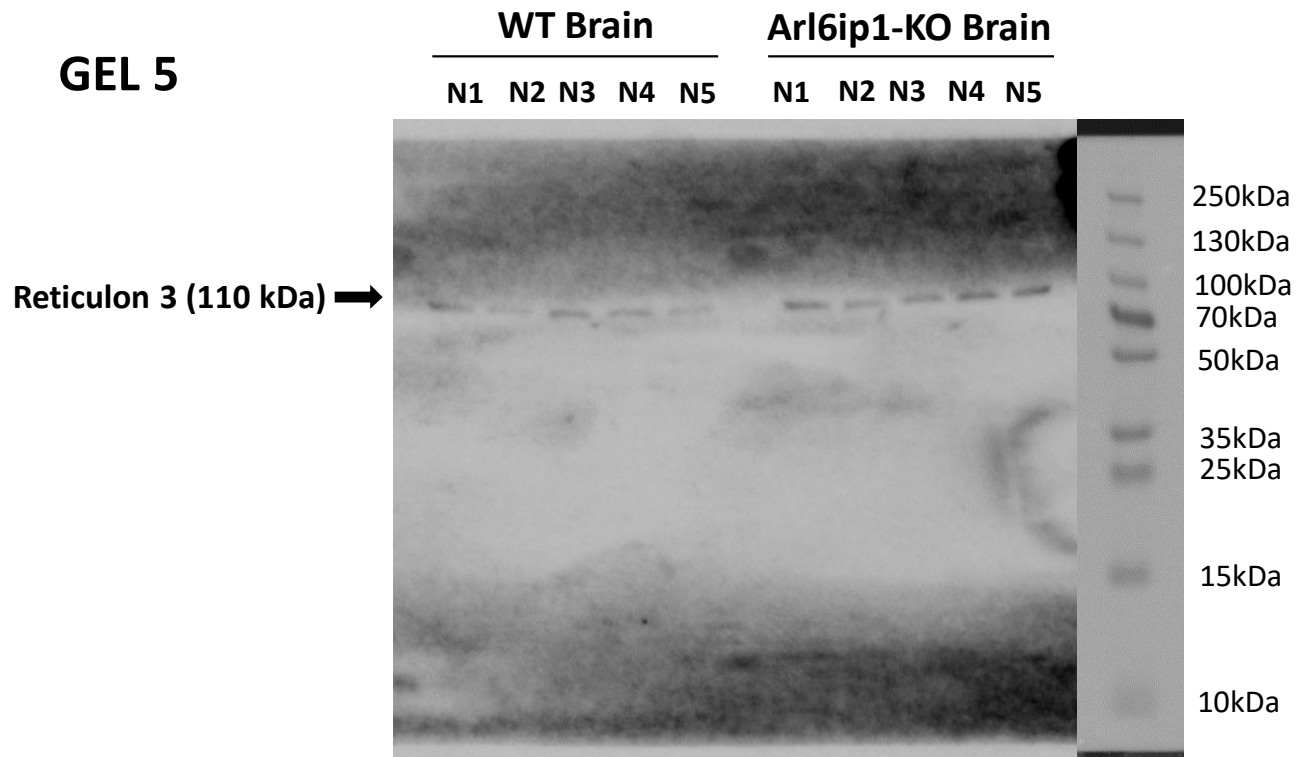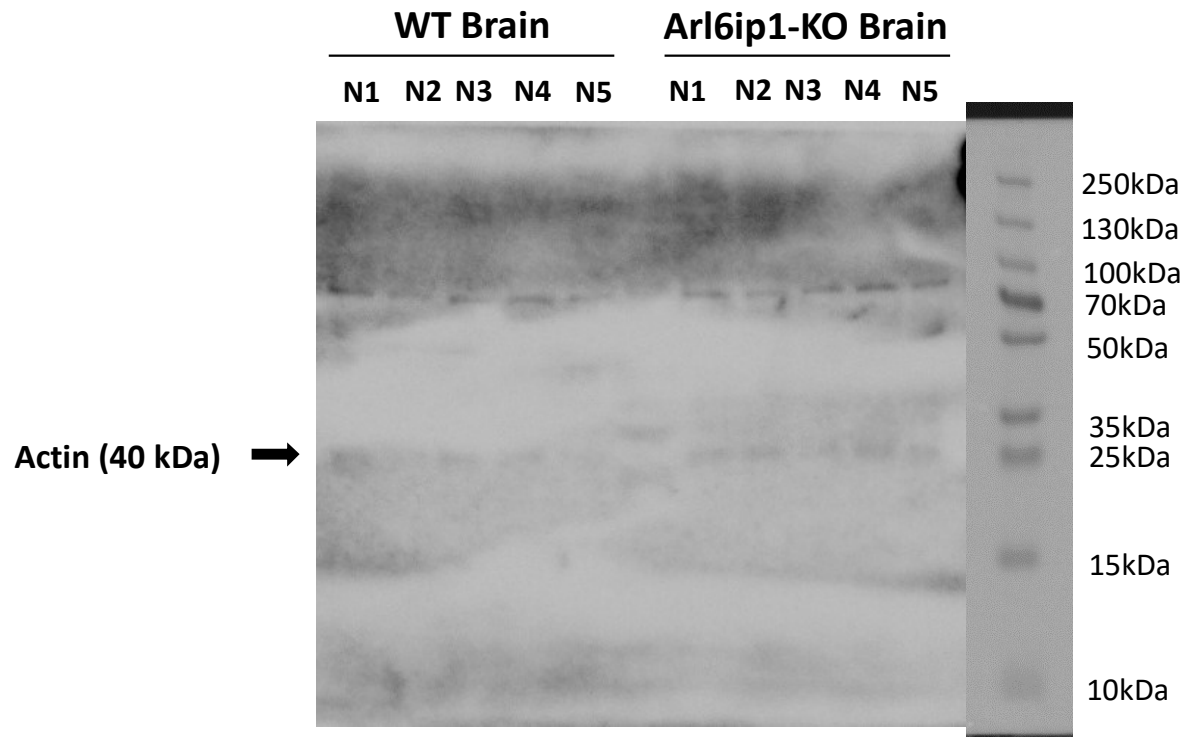

**EXT. FIG 1. I**

# GEL 6

High exposure

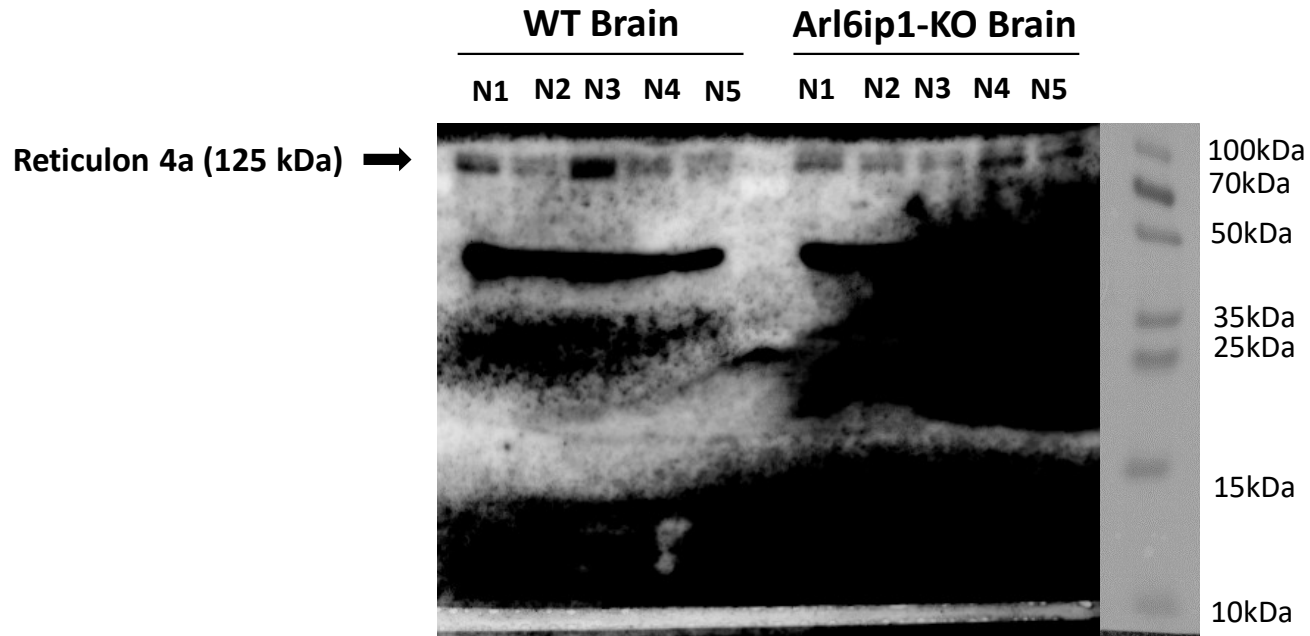

Low exposure

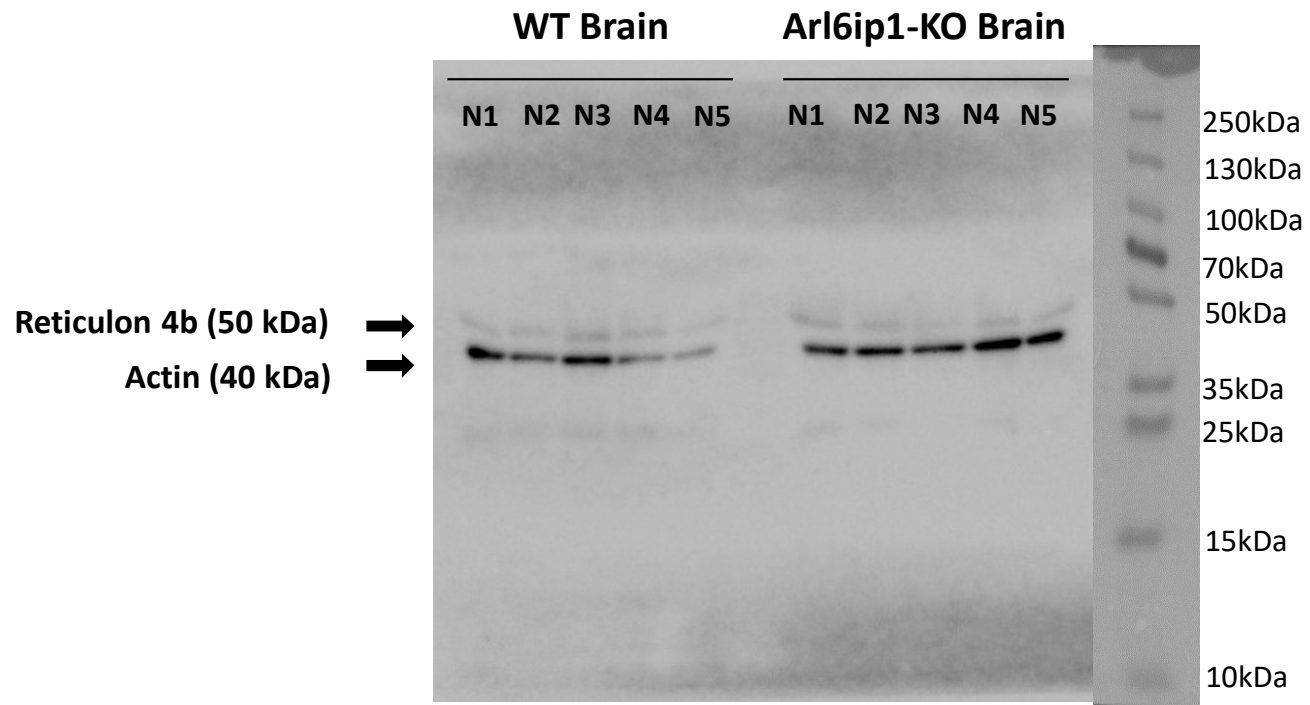

**EXT. FIG 1. I**

# GEL 7

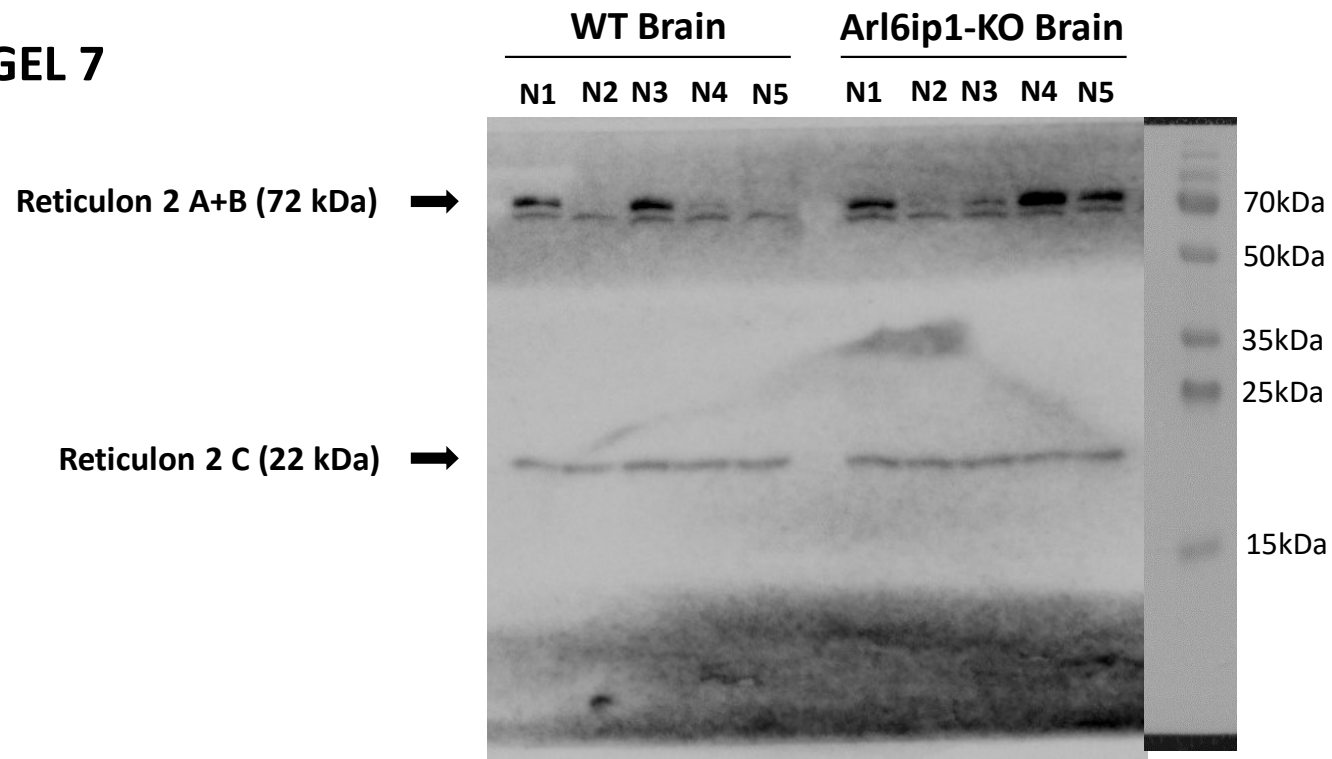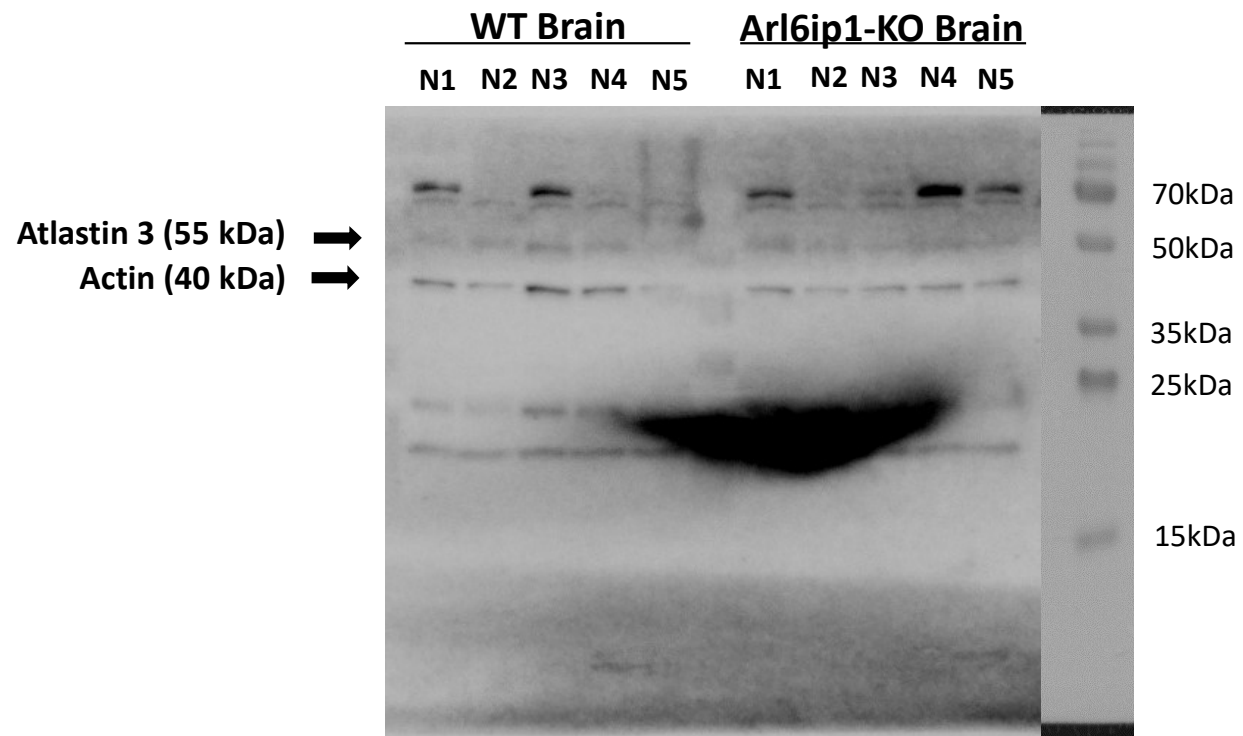

**EXT. FIG 1. I**



# EXT. FIG 2. D

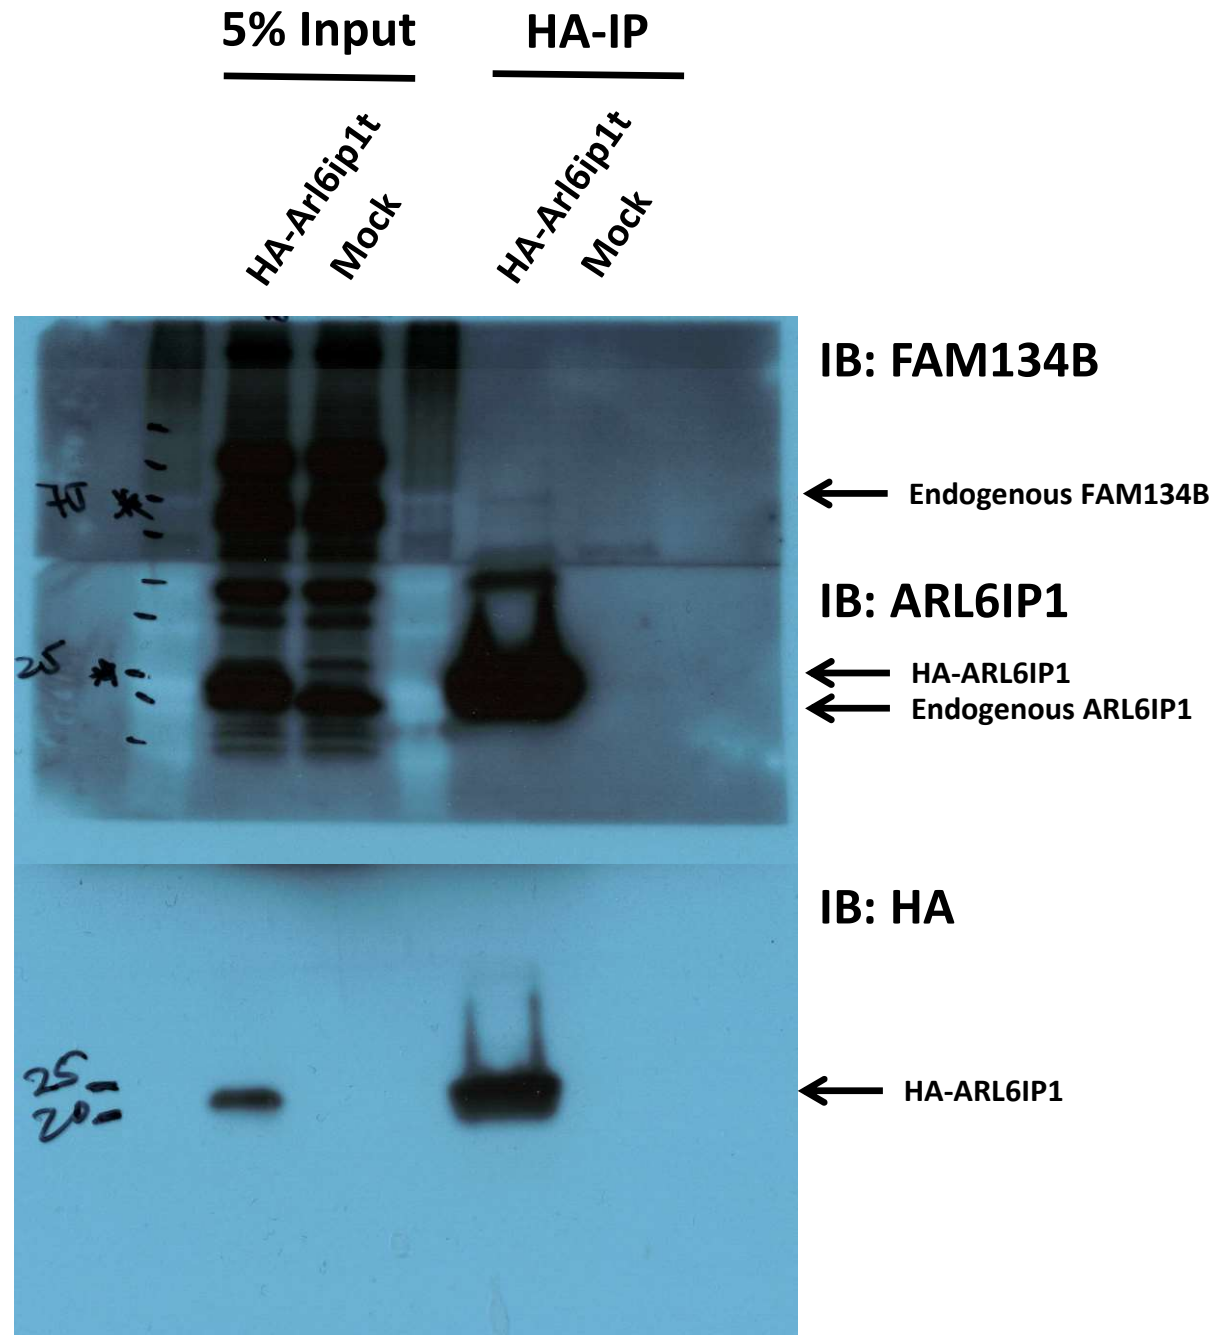

# EXT. FIG 2. E

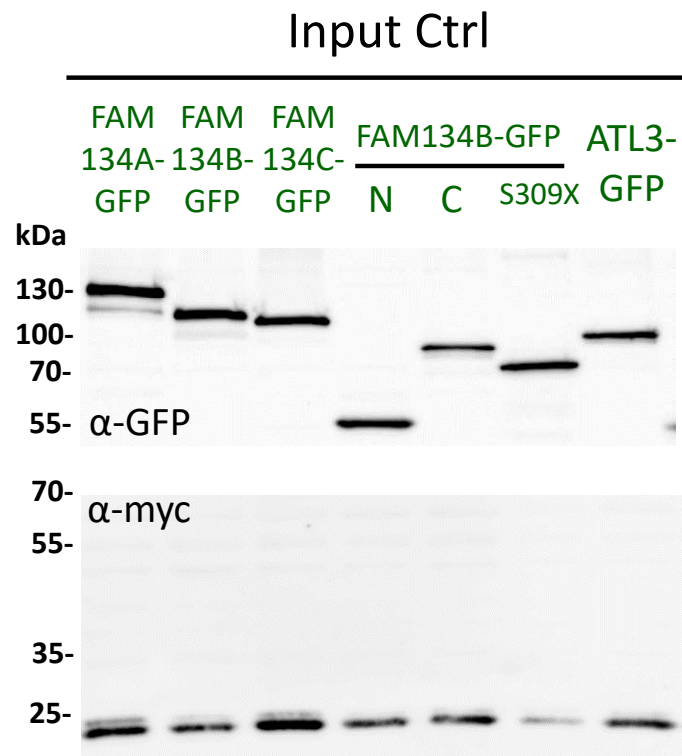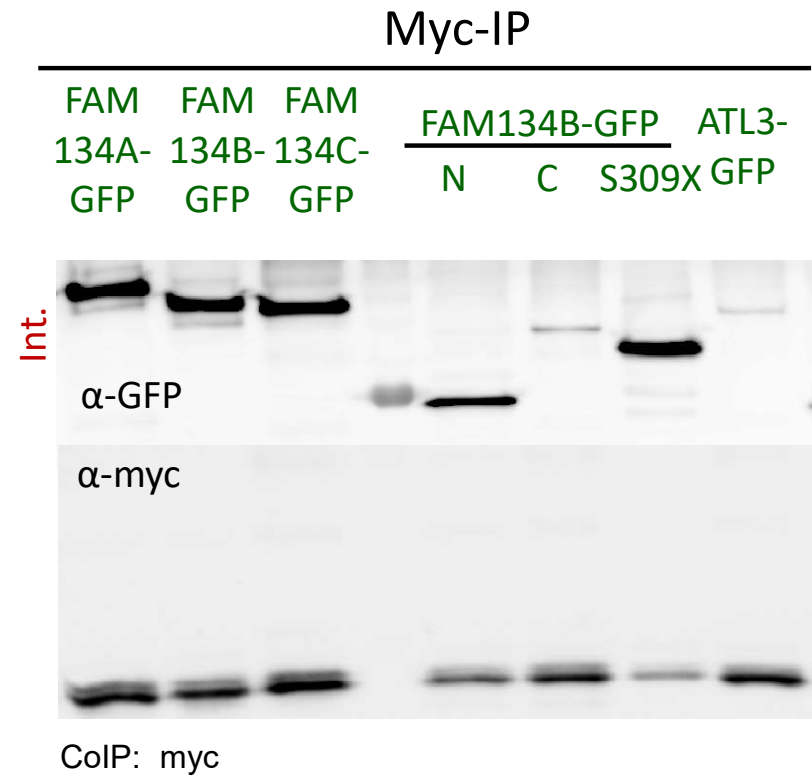

**INPUT**

**EXT. FIG 2. F**

**HA IP**

HA-ARL6IP1  
HA-ARL6IP1-Δ(TM1+2)  
HA-ARL6IP1-Δ(TM3+4)  
HA-ARL6IP1-Δ(TM1-4)  
HA-ARL6IP1-Δ(AH<sub>L</sub>)  
HA-ARL6IP1-Δ(AHC)\*  
HA-ARL6IP1-Δ(AH<sub>L</sub>+AHC)\*  
HA-ARL6IP1-Δ(AHC)  
HA-ARL6IP1-Δ(AH<sub>L</sub>+AHC)  
HA-ARL6IP1-7KR

HA-ARL6IP1  
HA-ARL6IP1-Δ(TM1+2)  
HA-ARL6IP1-Δ(TM3+4)  
HA-ARL6IP1-Δ(TM1-4)  
HA-ARL6IP1-Δ(AH<sub>L</sub>)  
HA-ARL6IP1-Δ(AHC)\*  
HA-ARL6IP1-Δ(AH<sub>L</sub>+AHC)\*  
HA-ARL6IP1-Δ(AHC)  
HA-ARL6IP1-Δ(AH<sub>L</sub>+AHC)  
HA-ARL6IP1-7KR

← **FAM134B (endogenous)** →

← **HA-ARL6IP1** →

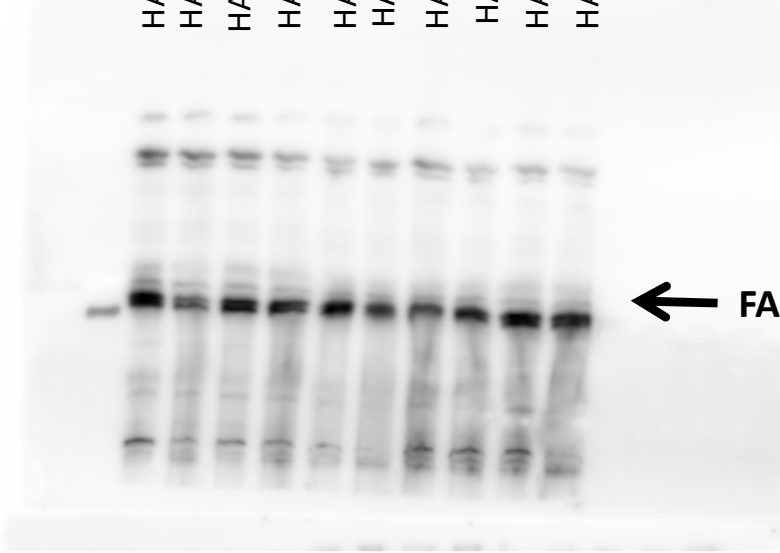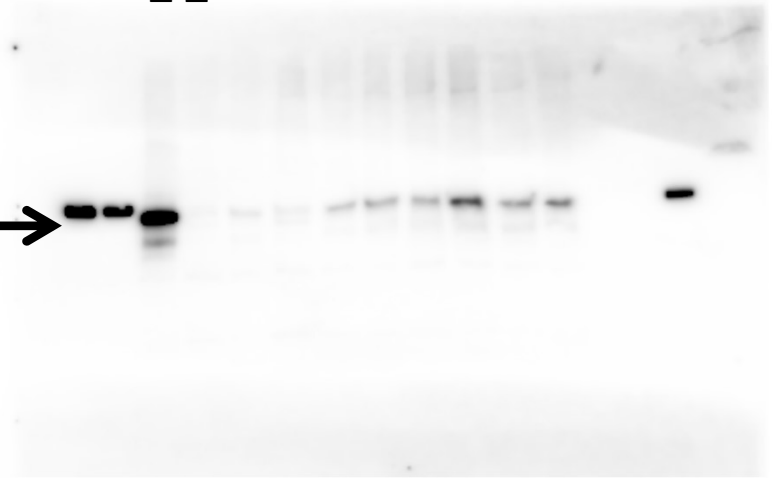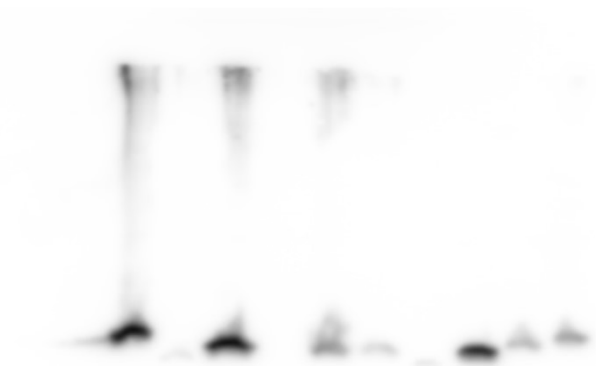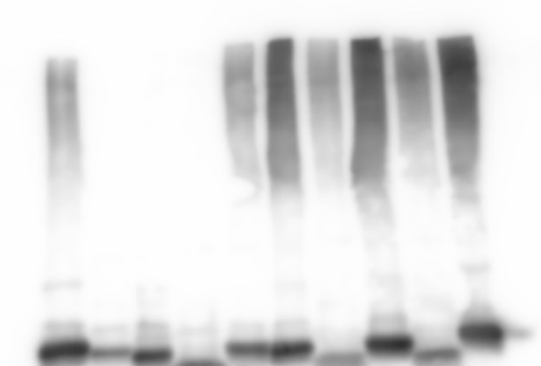

# INPUT

HA-ARL6IP1

HA-ARL6IP1-Δ(TM1+2)

HA-ARL6IP1-Δ(TM3+4)

HA-ARL6IP1-Δ(TM1-4)

HA-ARL6IP1-Δ(AH<sub>L</sub>)

HA-ARL6IP1-Δ(AH<sub>C</sub>)\*

HA-ARL6IP1-Δ(AH<sub>L</sub>+AH<sub>C</sub>)\*

HA-ARL6IP1-Δ(AH<sub>C</sub>)

HA-ARL6IP1-Δ(AH<sub>L</sub>+AH<sub>C</sub>)

HA-ARL6IP1-7KR

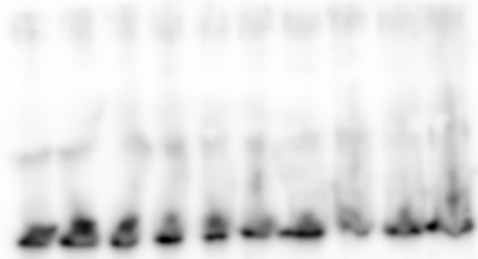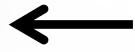

GAPDH

# EXT. FIG 2. F

# EXT. FIG 2. G

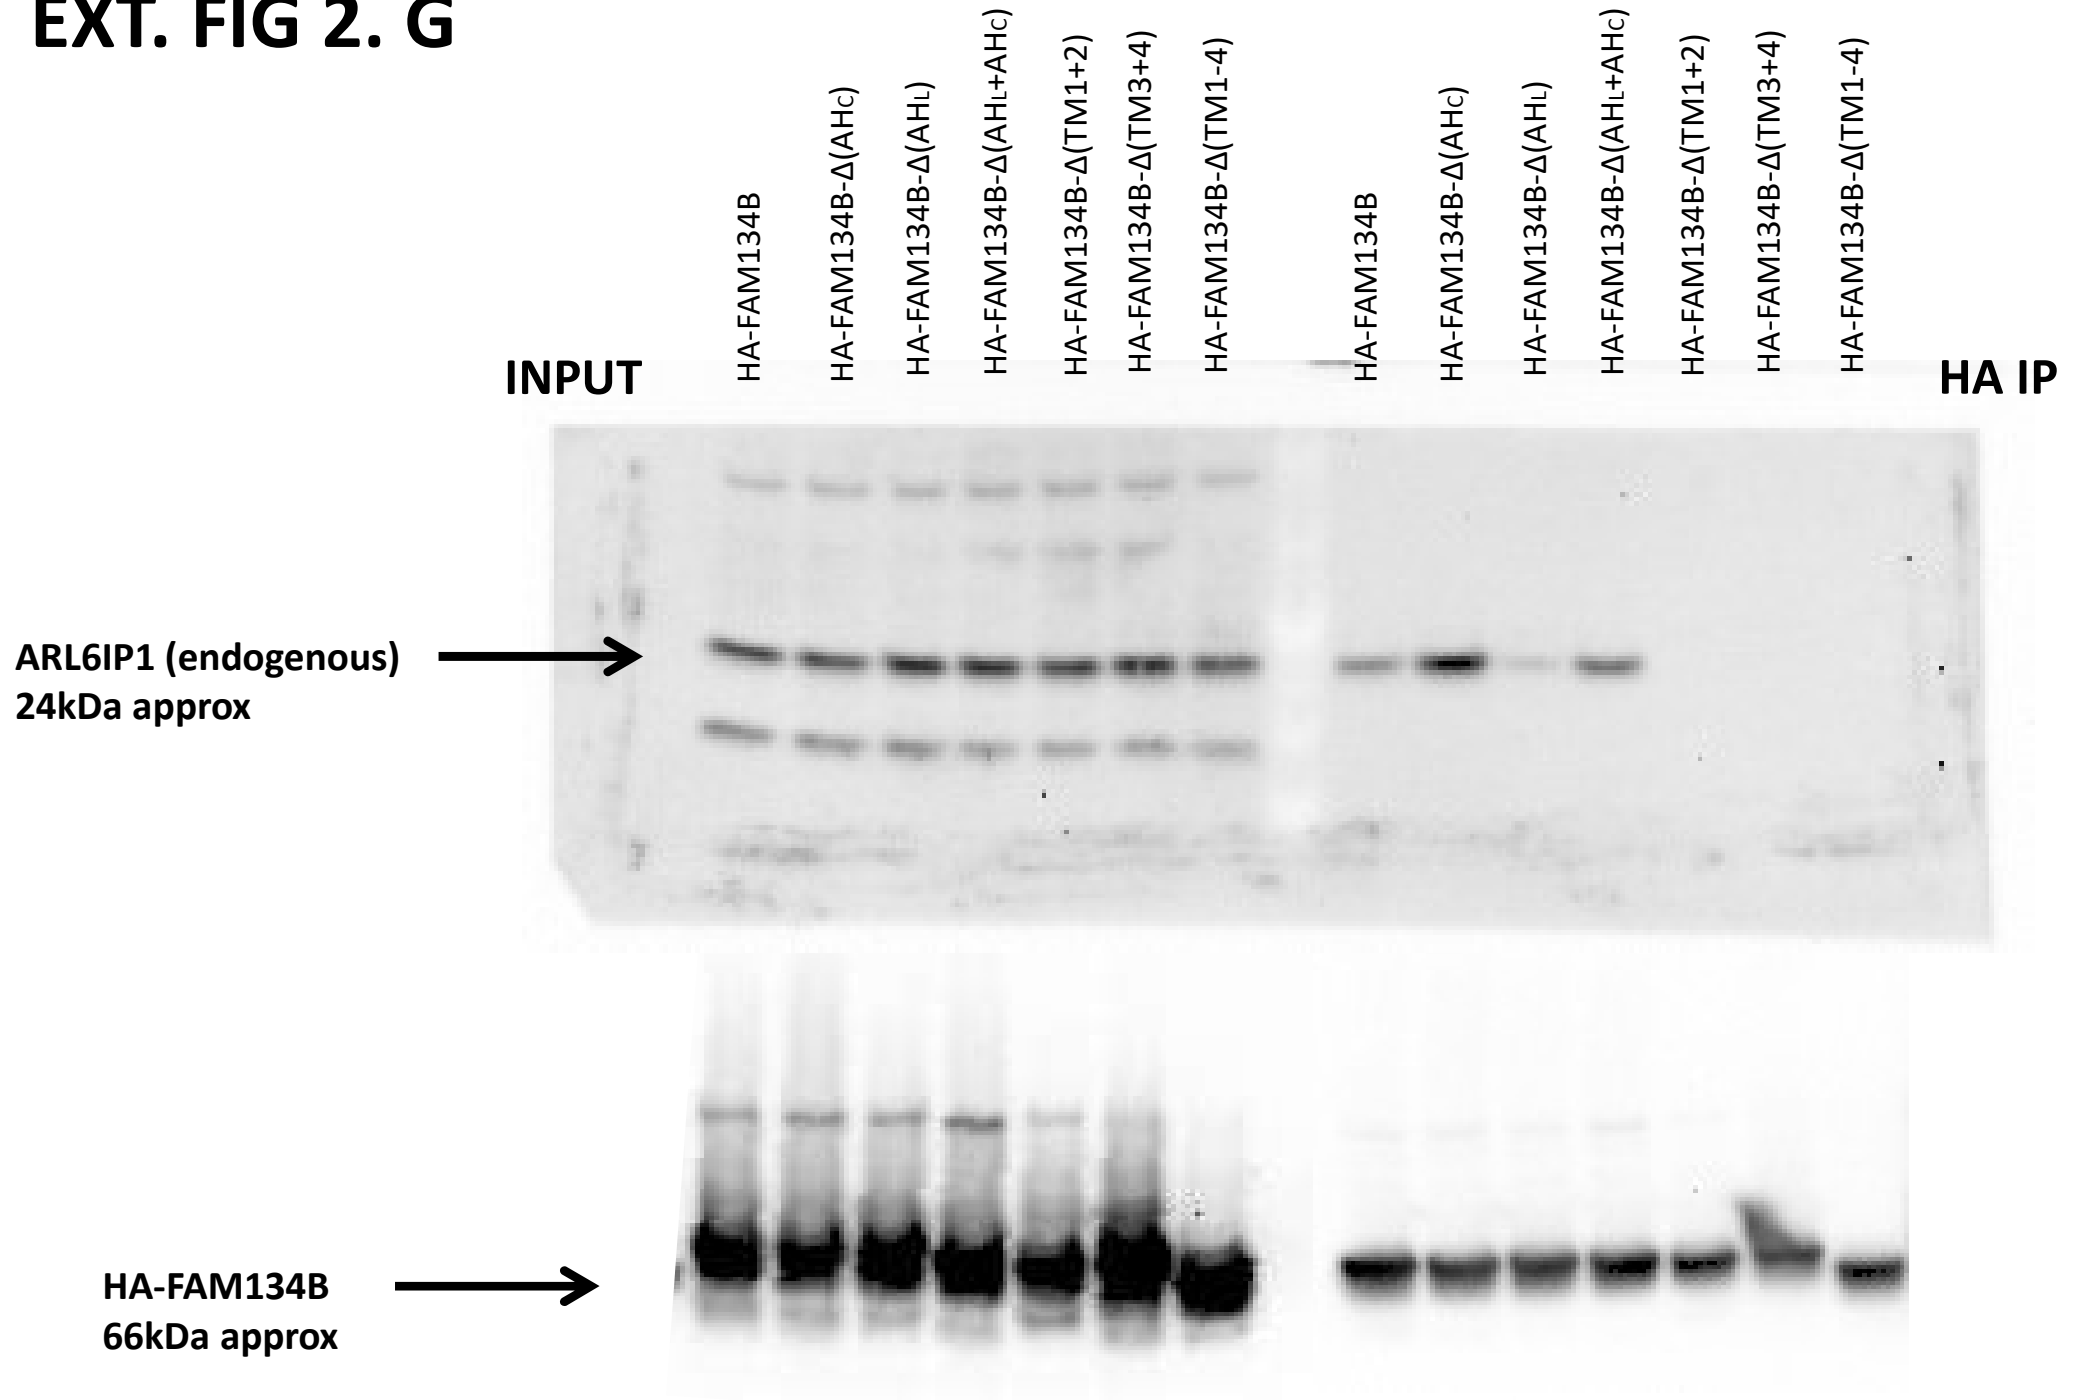

# EXT. FIG 3. E

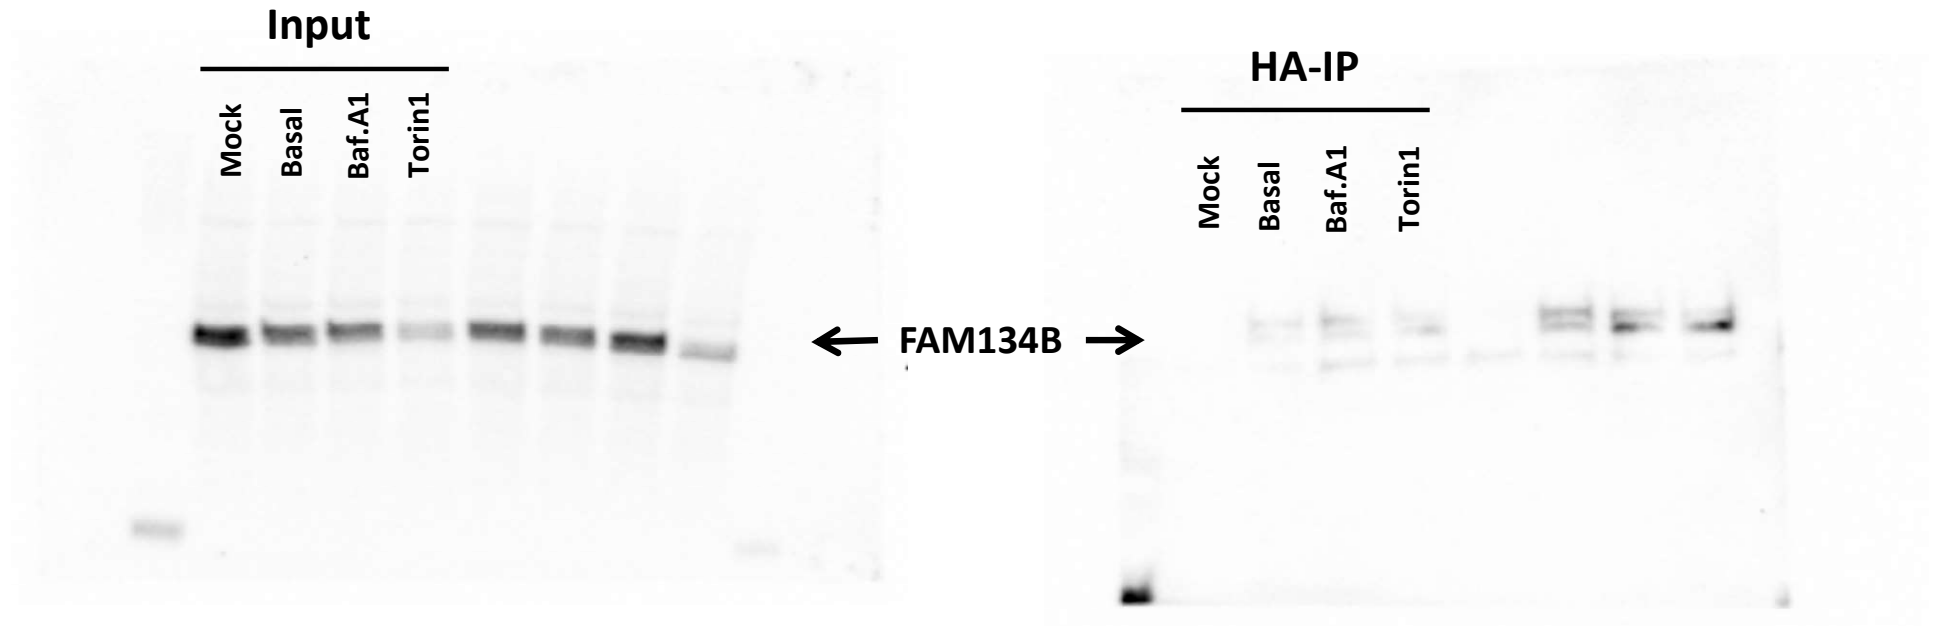

# EXT. FIG 3. E

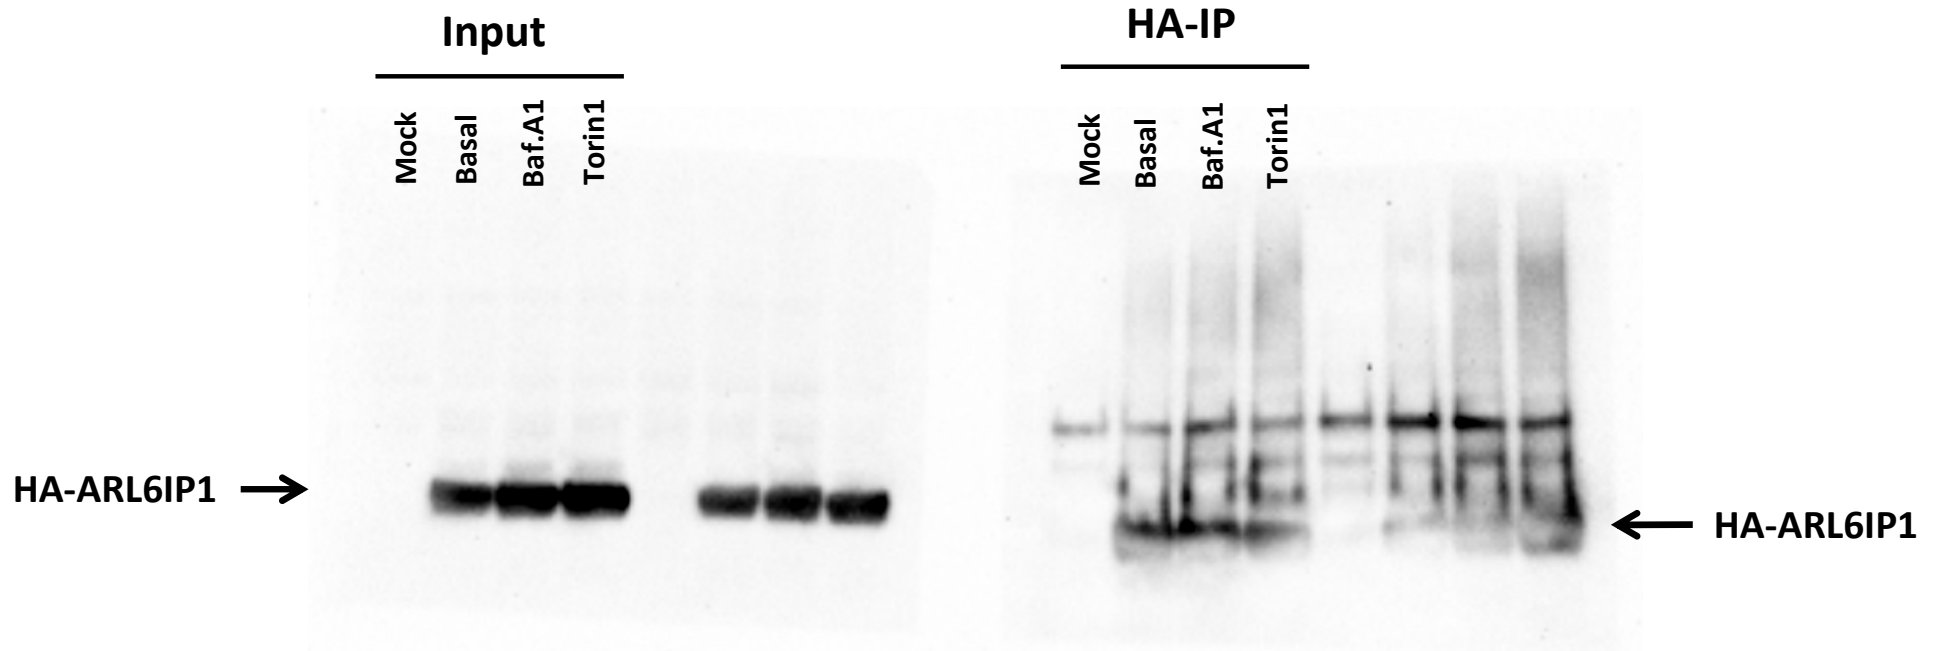

# EXT. FIG 3. E

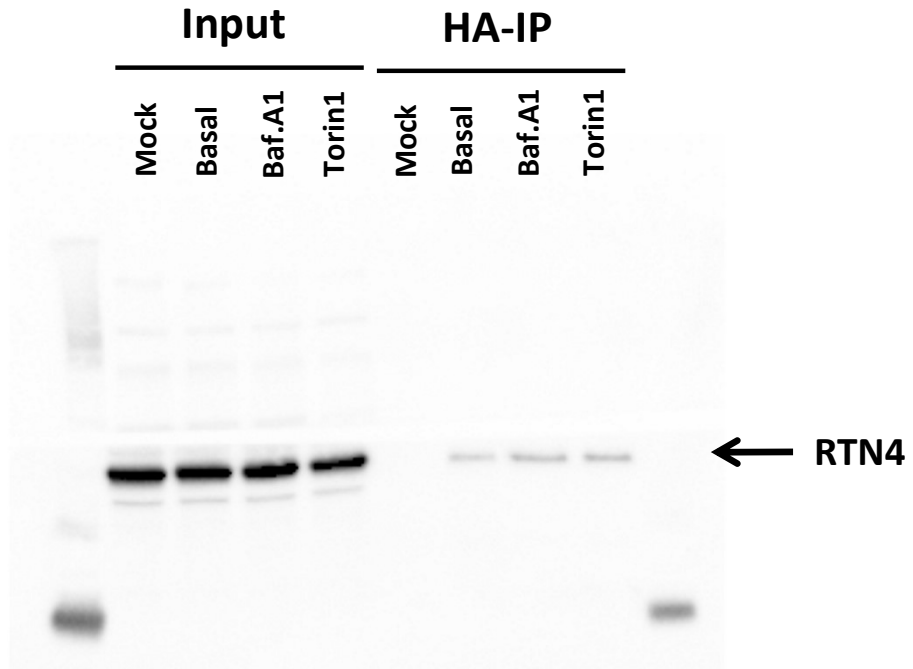



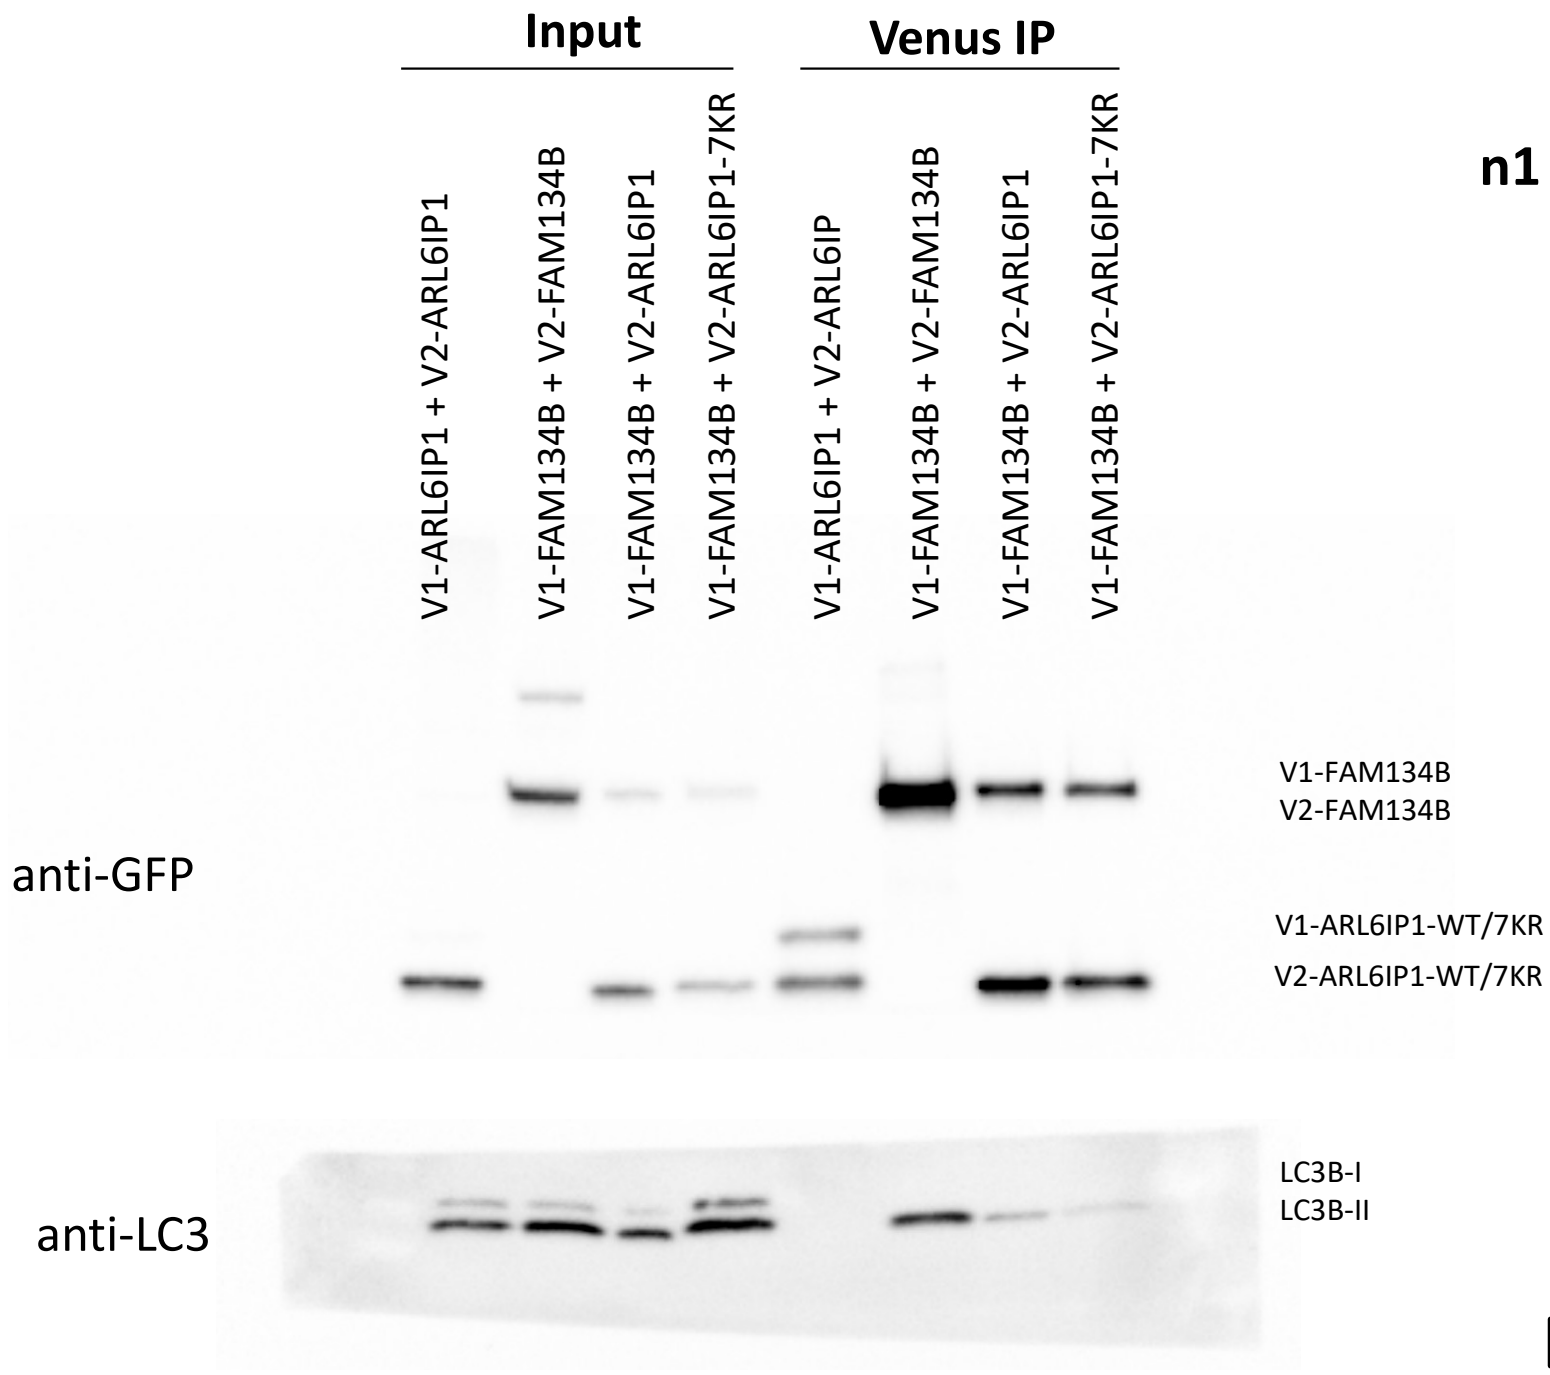

**EXT. FIG 5. D**

IP

V1-ARL6IP1 + V2-ARL6IP1  
 V1-ARL6IP1-7KR + V2-ARL6IP1-7KR  
 V1-ARL6IP1-WT+ V2-ARL6IP1-7KR  
 V1-FAM134B + V2-FAM134B  
 V1-FAM134B-17KR + V2-FAM134B-17KR  
 V1-FAM134B-WT + V2-FAM134B-17KR  
 V1-FAM134B + V2-ARL6IP1  
 V1-FAM134B-WT + V2-ARL6IP1 7KR  
 V1-FAM134B-17KR + V2-ARL6IP1-WT  
 V1-FAM134B-17KR + V2-ARL6IP1-7KR

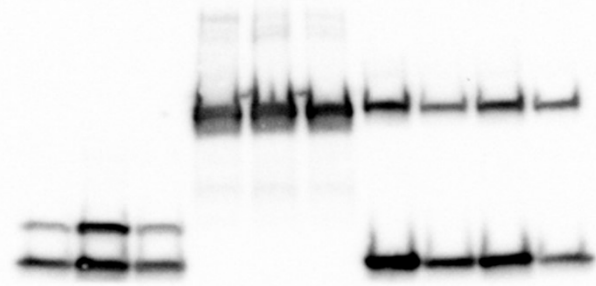

Venus IP

V1-FAM134B  
 V2-FAM134B  
 V1-ARL6IP1-WT/7KR  
 V2-ARL6IP1-WT/7KR

Input

V1-FAM134B  
 V2-FAM134B  
 V1-ARL6IP1-WT/7KR  
 V2-ARL6IP1-WT/7KR

anti-GFP

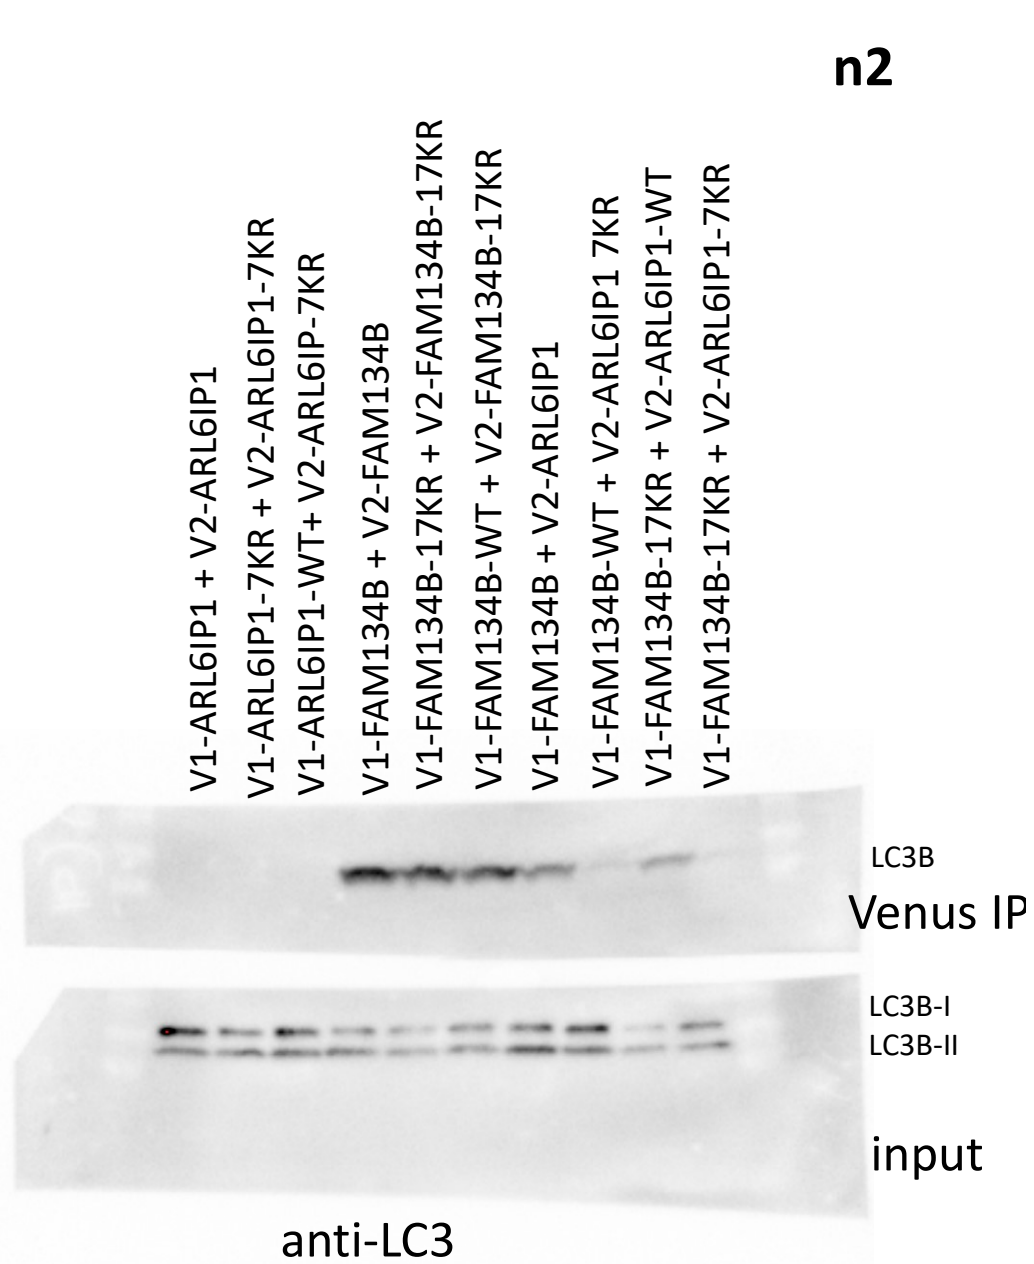

V1-ARL6IP1 + V2-ARL6IP1  
 V1-ARL6IP1-7KR + V2-ARL6IP1-7KR  
 V1-ARL6IP1-WT+ V2-ARL6IP1-7KR  
 V1-FAM134B + V2-FAM134B  
 V1-FAM134B-17KR + V2-FAM134B-17KR  
 V1-FAM134B-WT + V2-FAM134B-17KR  
 V1-FAM134B + V2-ARL6IP1  
 V1-FAM134B-WT + V2-ARL6IP1 7KR  
 V1-FAM134B-17KR + V2-ARL6IP1-WT  
 V1-FAM134B-17KR + V2-ARL6IP1-7KR

n2

LC3B  
 Venus IP  
 LC3B-I  
 LC3B-II  
 input

anti-LC3

EXT. FIG 5. D

**Input**

**Venus IP**

**n3 shown in the figure.**

V1-ARL6IP1 + V2-ARL6IP1  
V1-ARL6IP1-7KR + V2-ARL6IP1-7KR  
V1-FAM134B + V2-FAM134B  
V1-FAM134B + V2-ARL6IP1  
V1-FAM134B + V2-ARL6IP1-7KR  
V1-ARL6IP1 + V2-ARL6IP1  
V1-ARL6IP1-7KR + V2-ARL6IP1-7KR  
V1-FAM134B + V2-FAM134B  
V1-FAM134B + V2-ARL6IP1  
V1-FAM134B + V2-ARL6IP1-7KR

IB: anti GFP

V1-FAM134B  
V2-FAM134B

V1-ARL6IP1-WT/7KR  
V2-ARL6IP1-WT/7KR

LC3B-I  
LC3B-II

**EXT. FIG 5. D**

# EXT. FIG 5. F

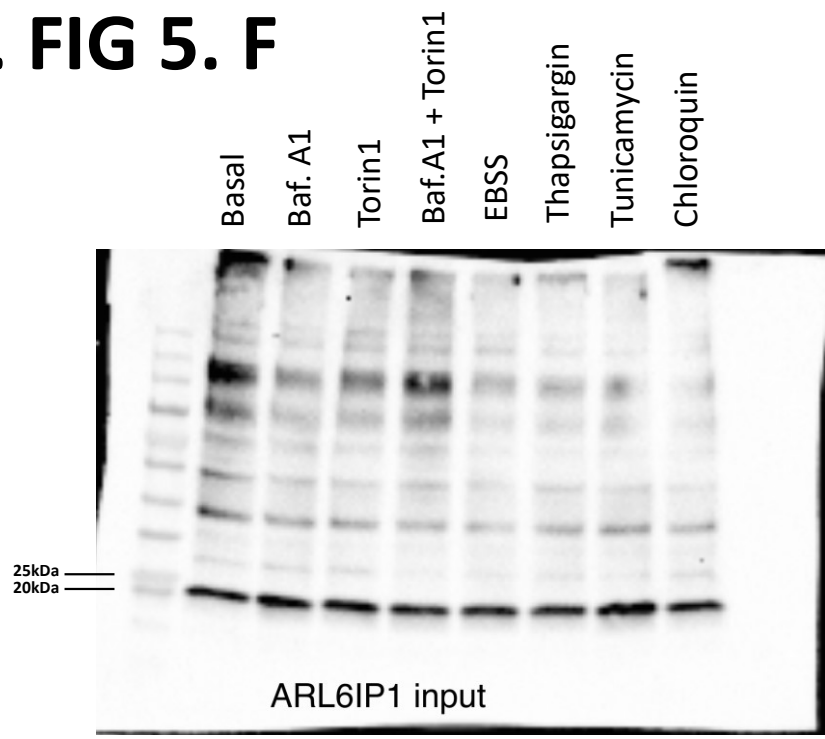

IB: ARL6IP1  
(24kDa)

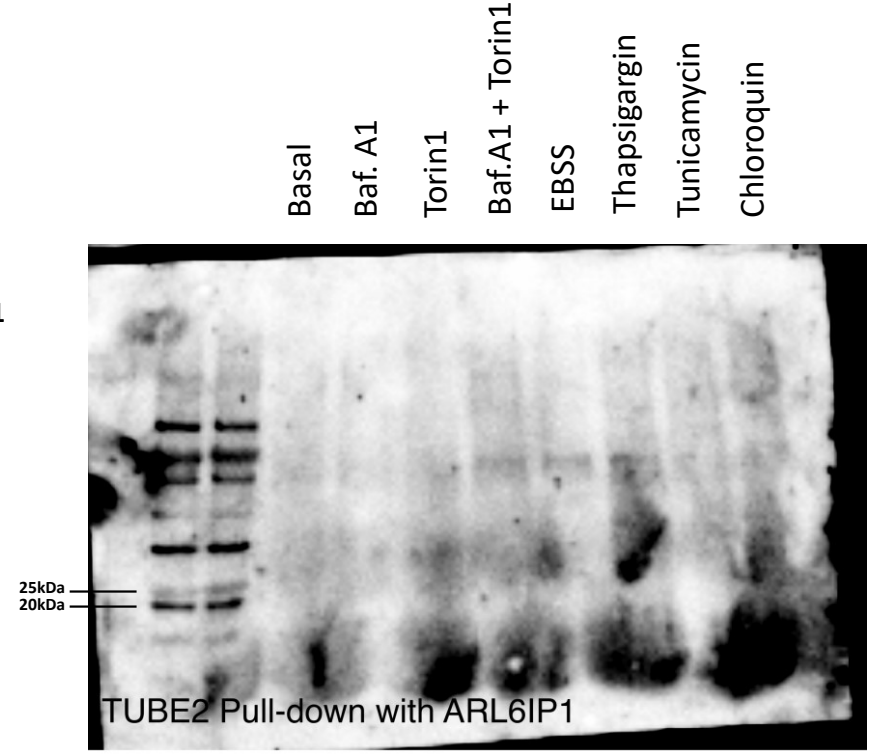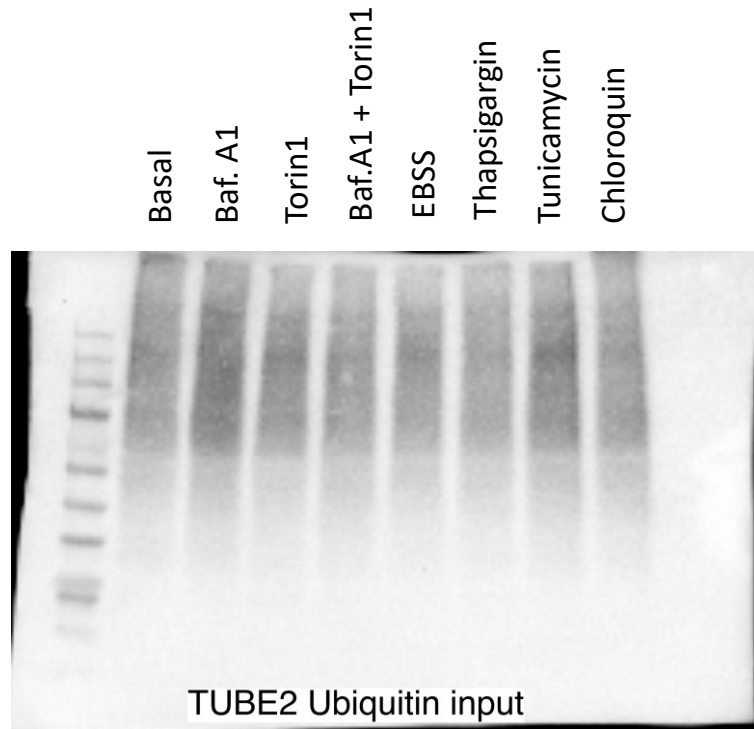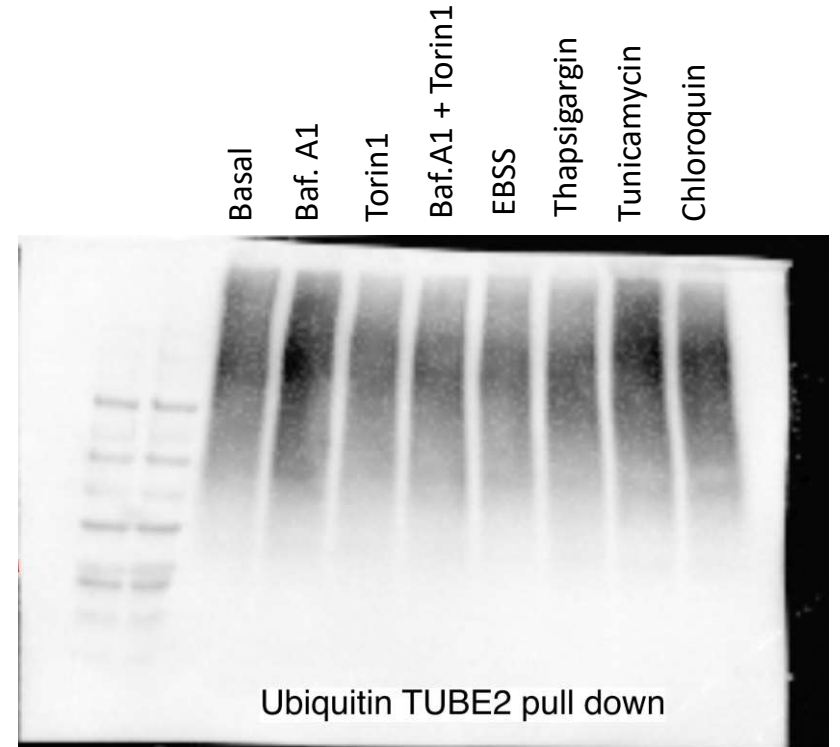

# EXT. FIG 5. G

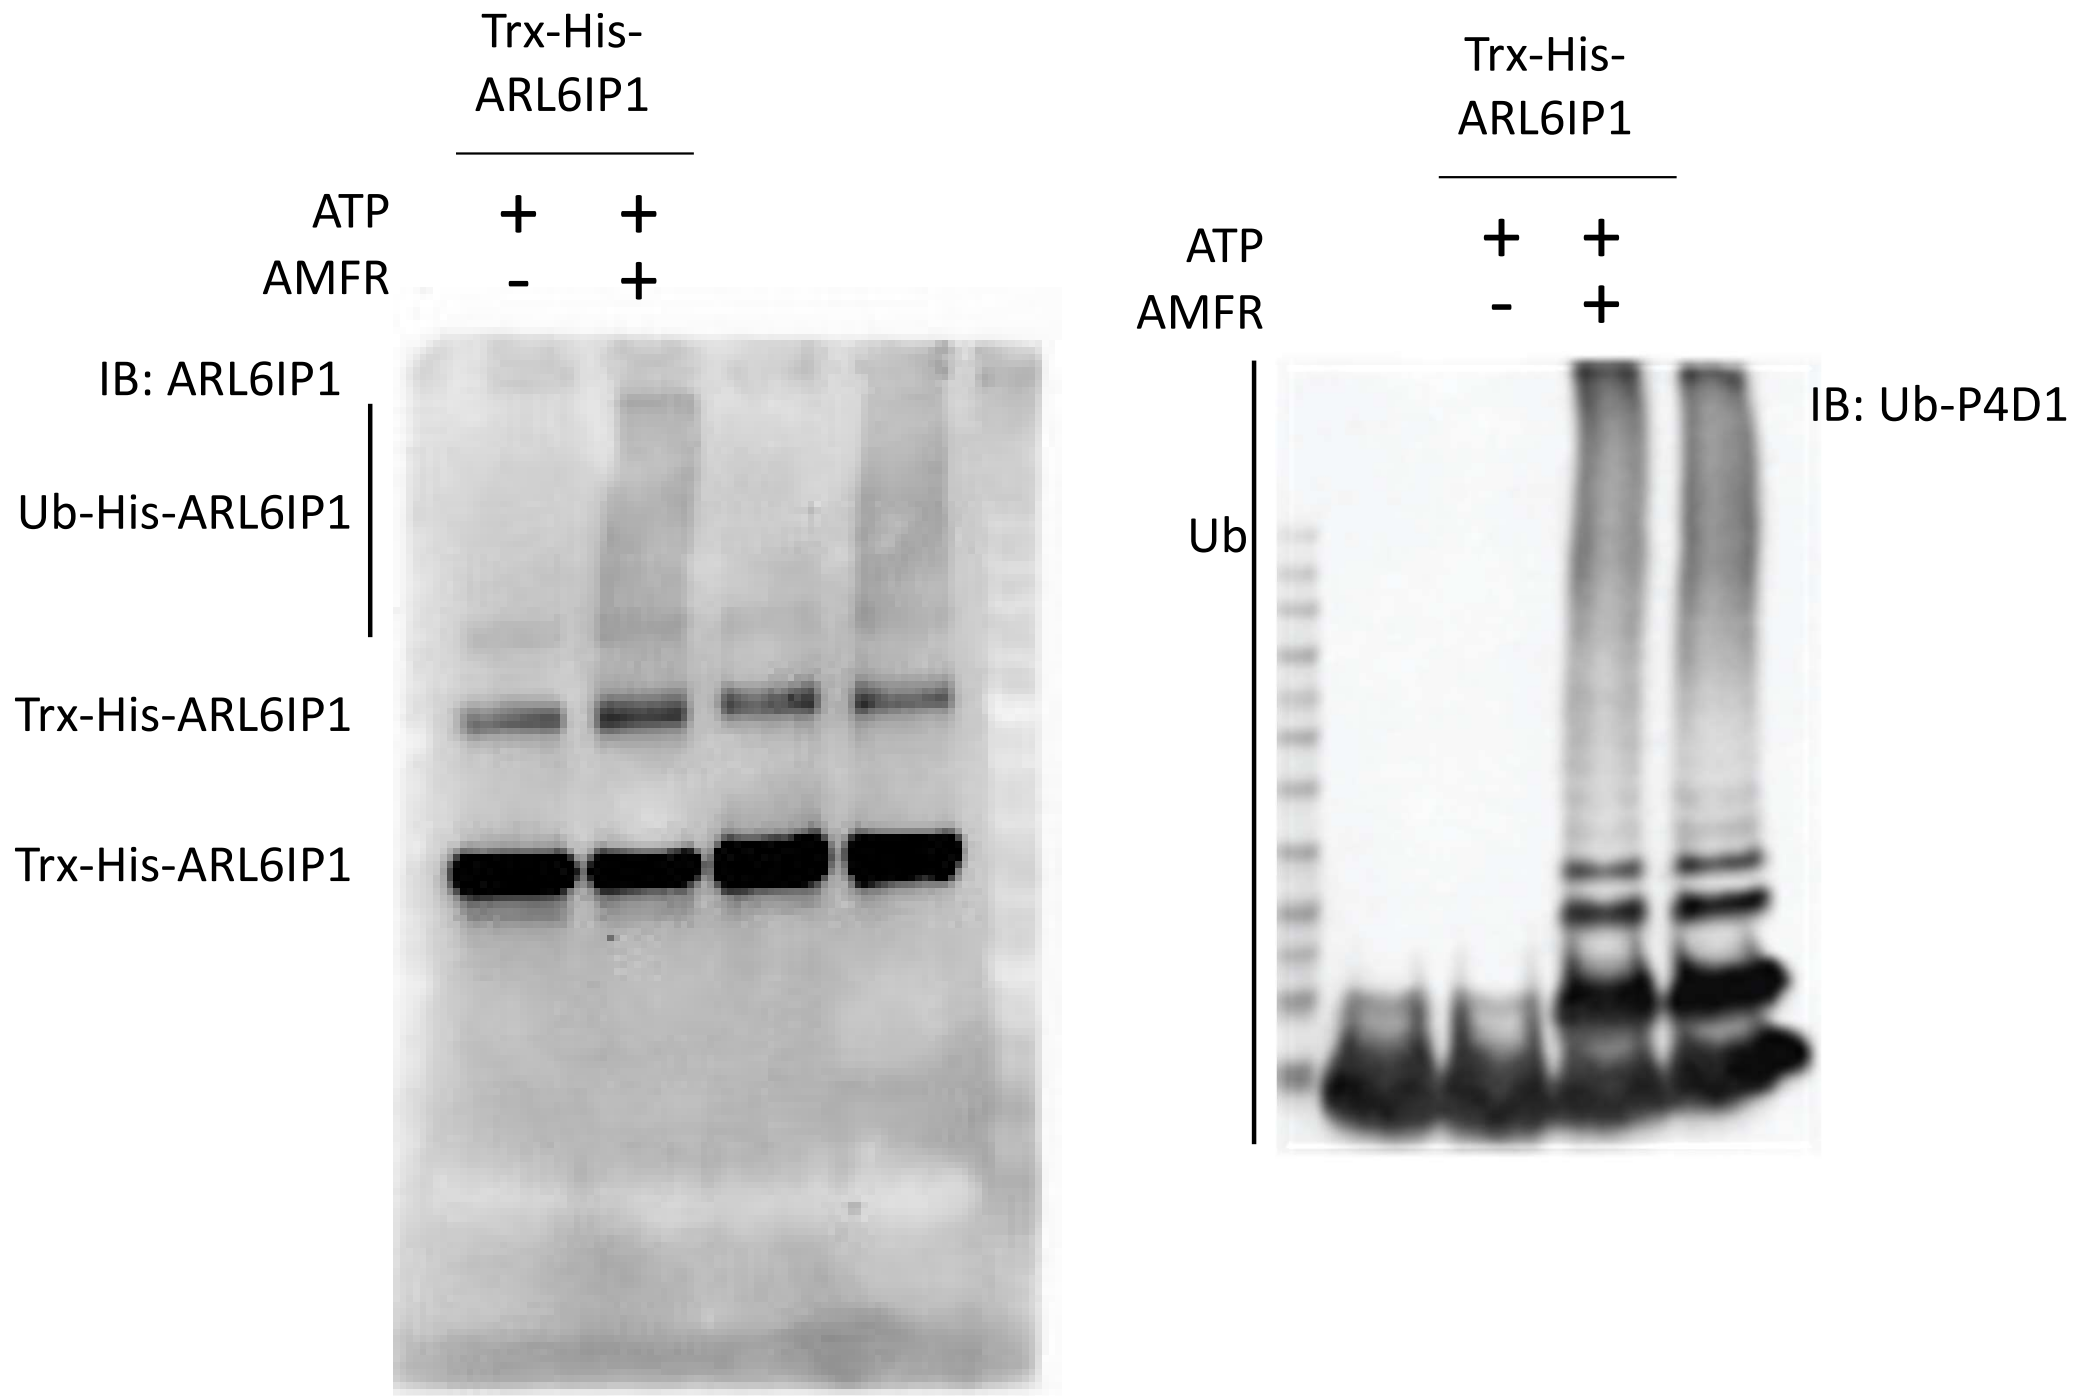

# EXT. FIG 6. B

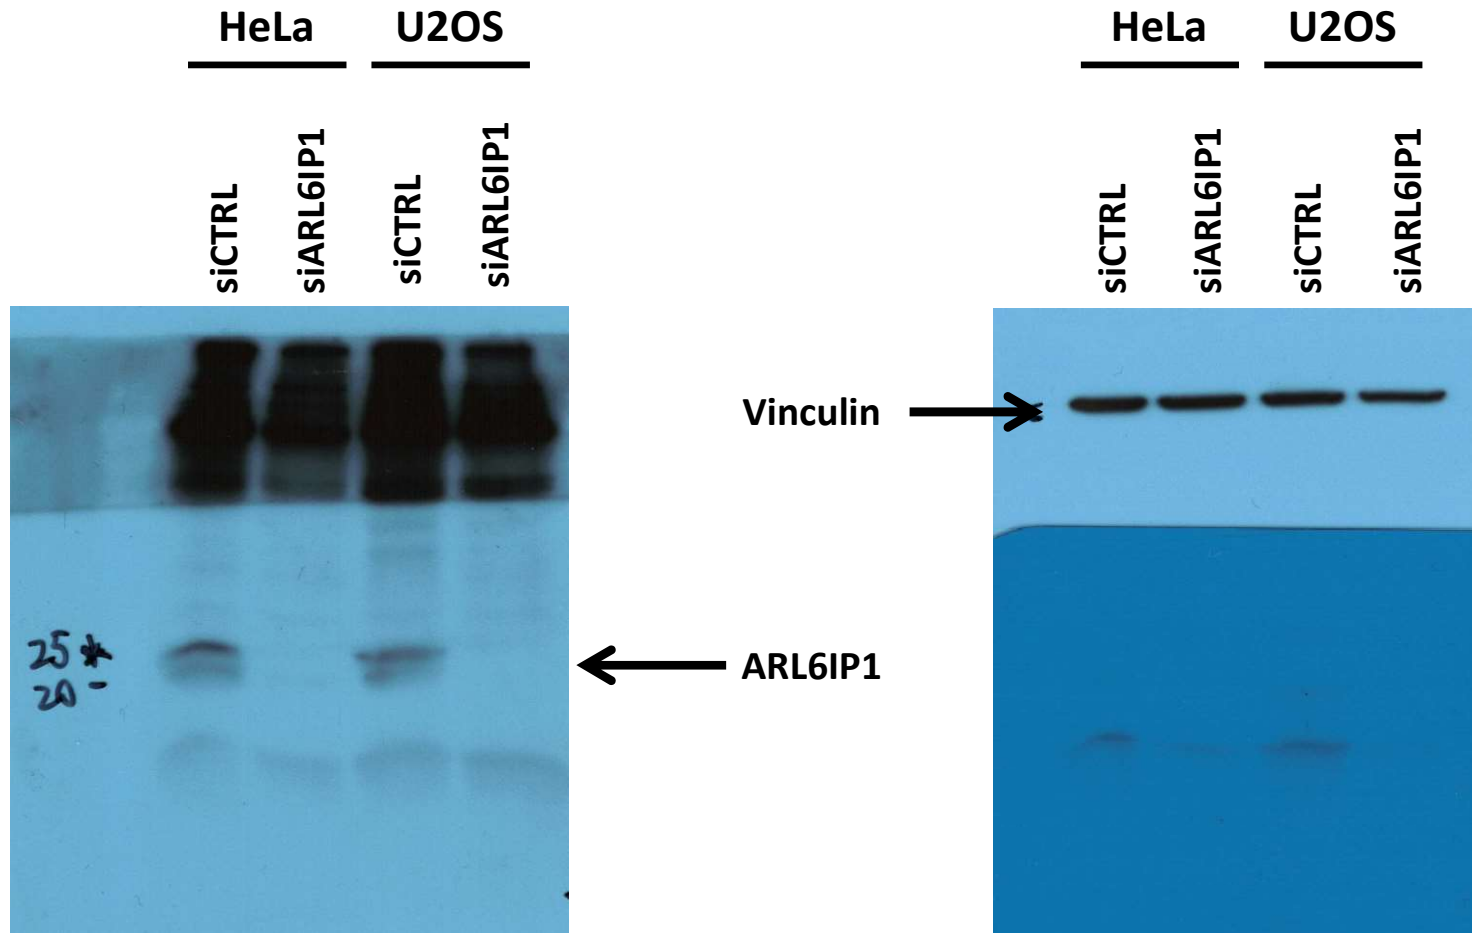

# EXT. FIG 7. A

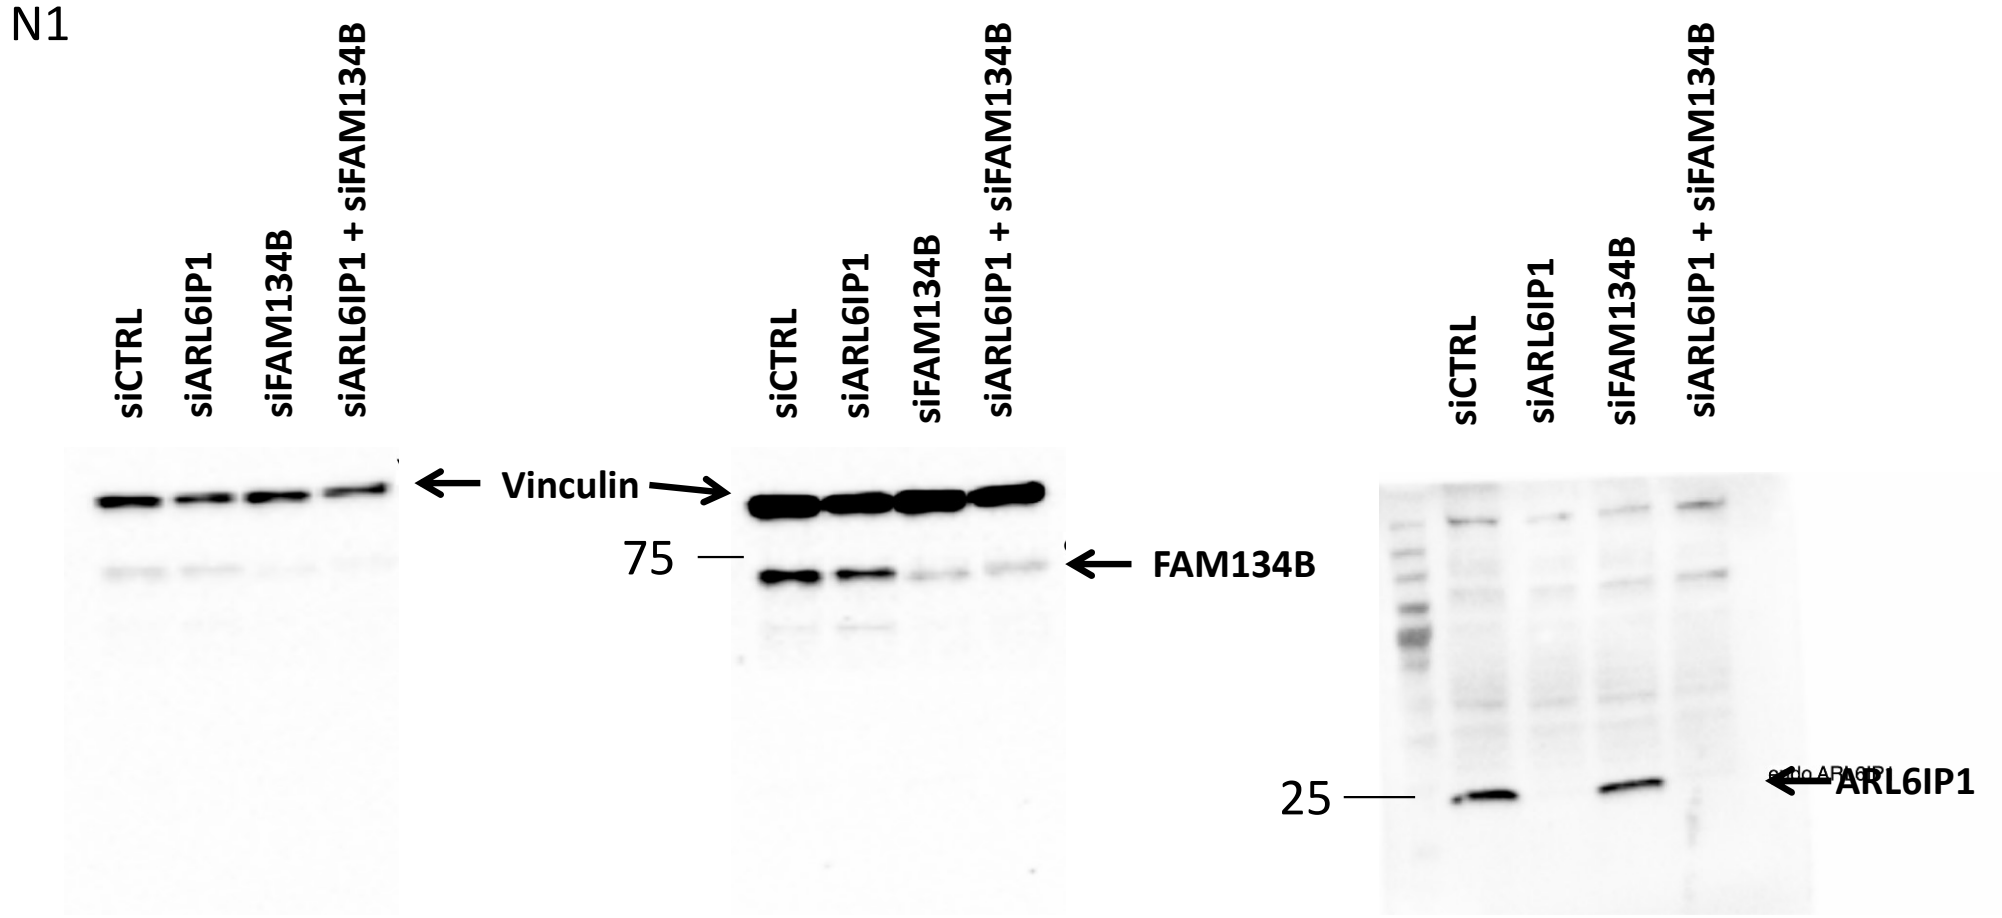

# EXT. FIG 7. A

N2 & N3

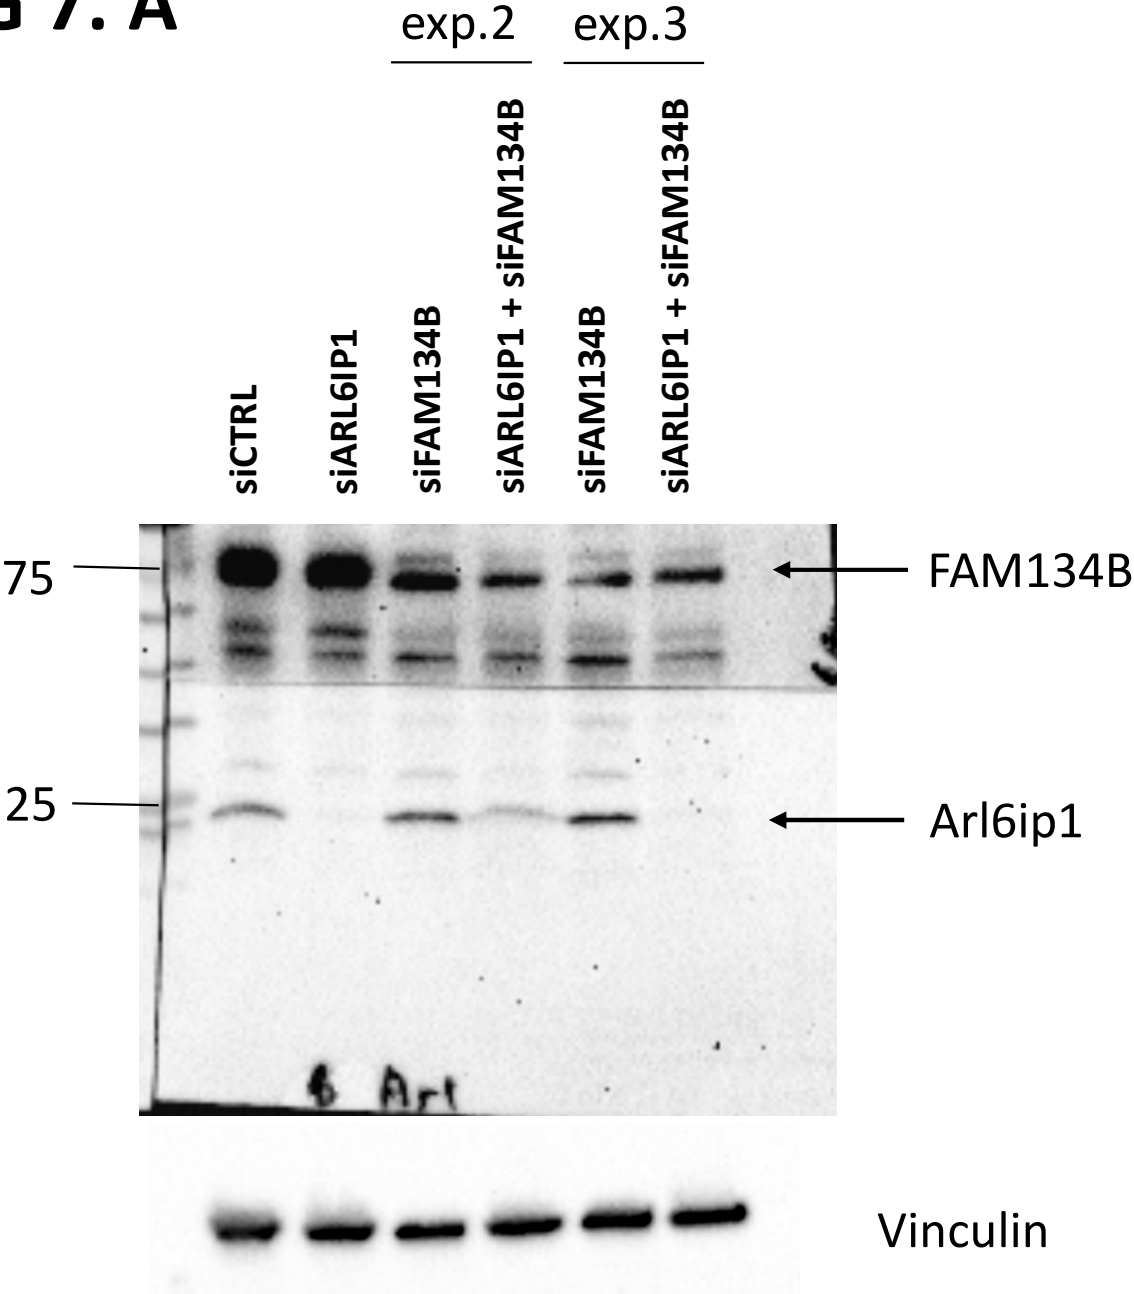



# EXT. FIG 7. D

U2OS  
mCherry-GFP-LC3

siCTRL  
siARL6IP1

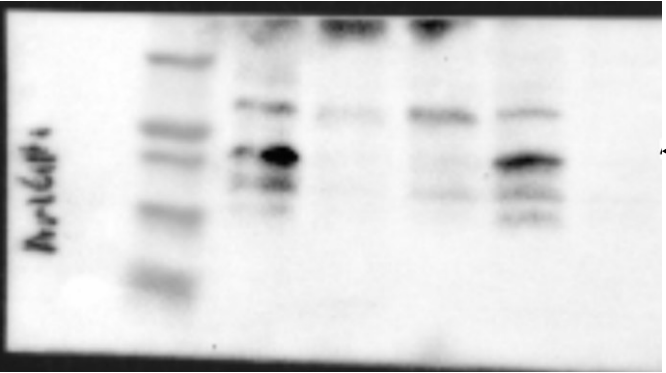

← ARL6IP1

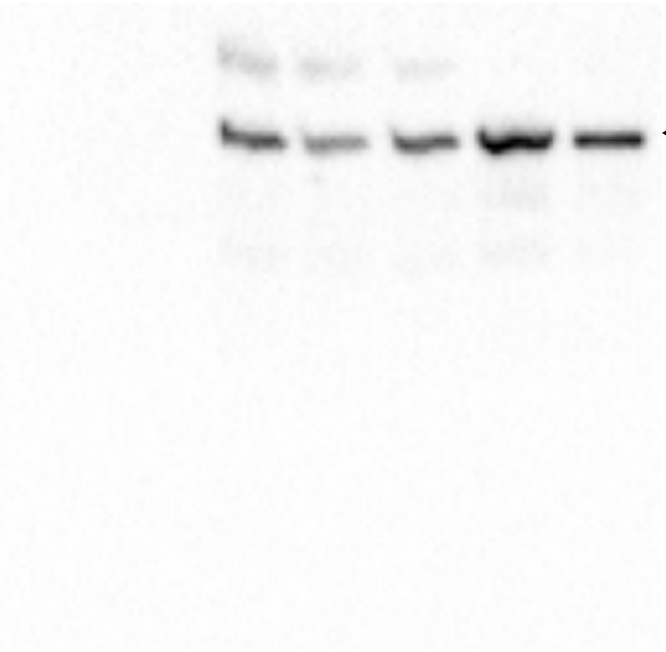

← Vinculin

# EXT. FIG 9. E

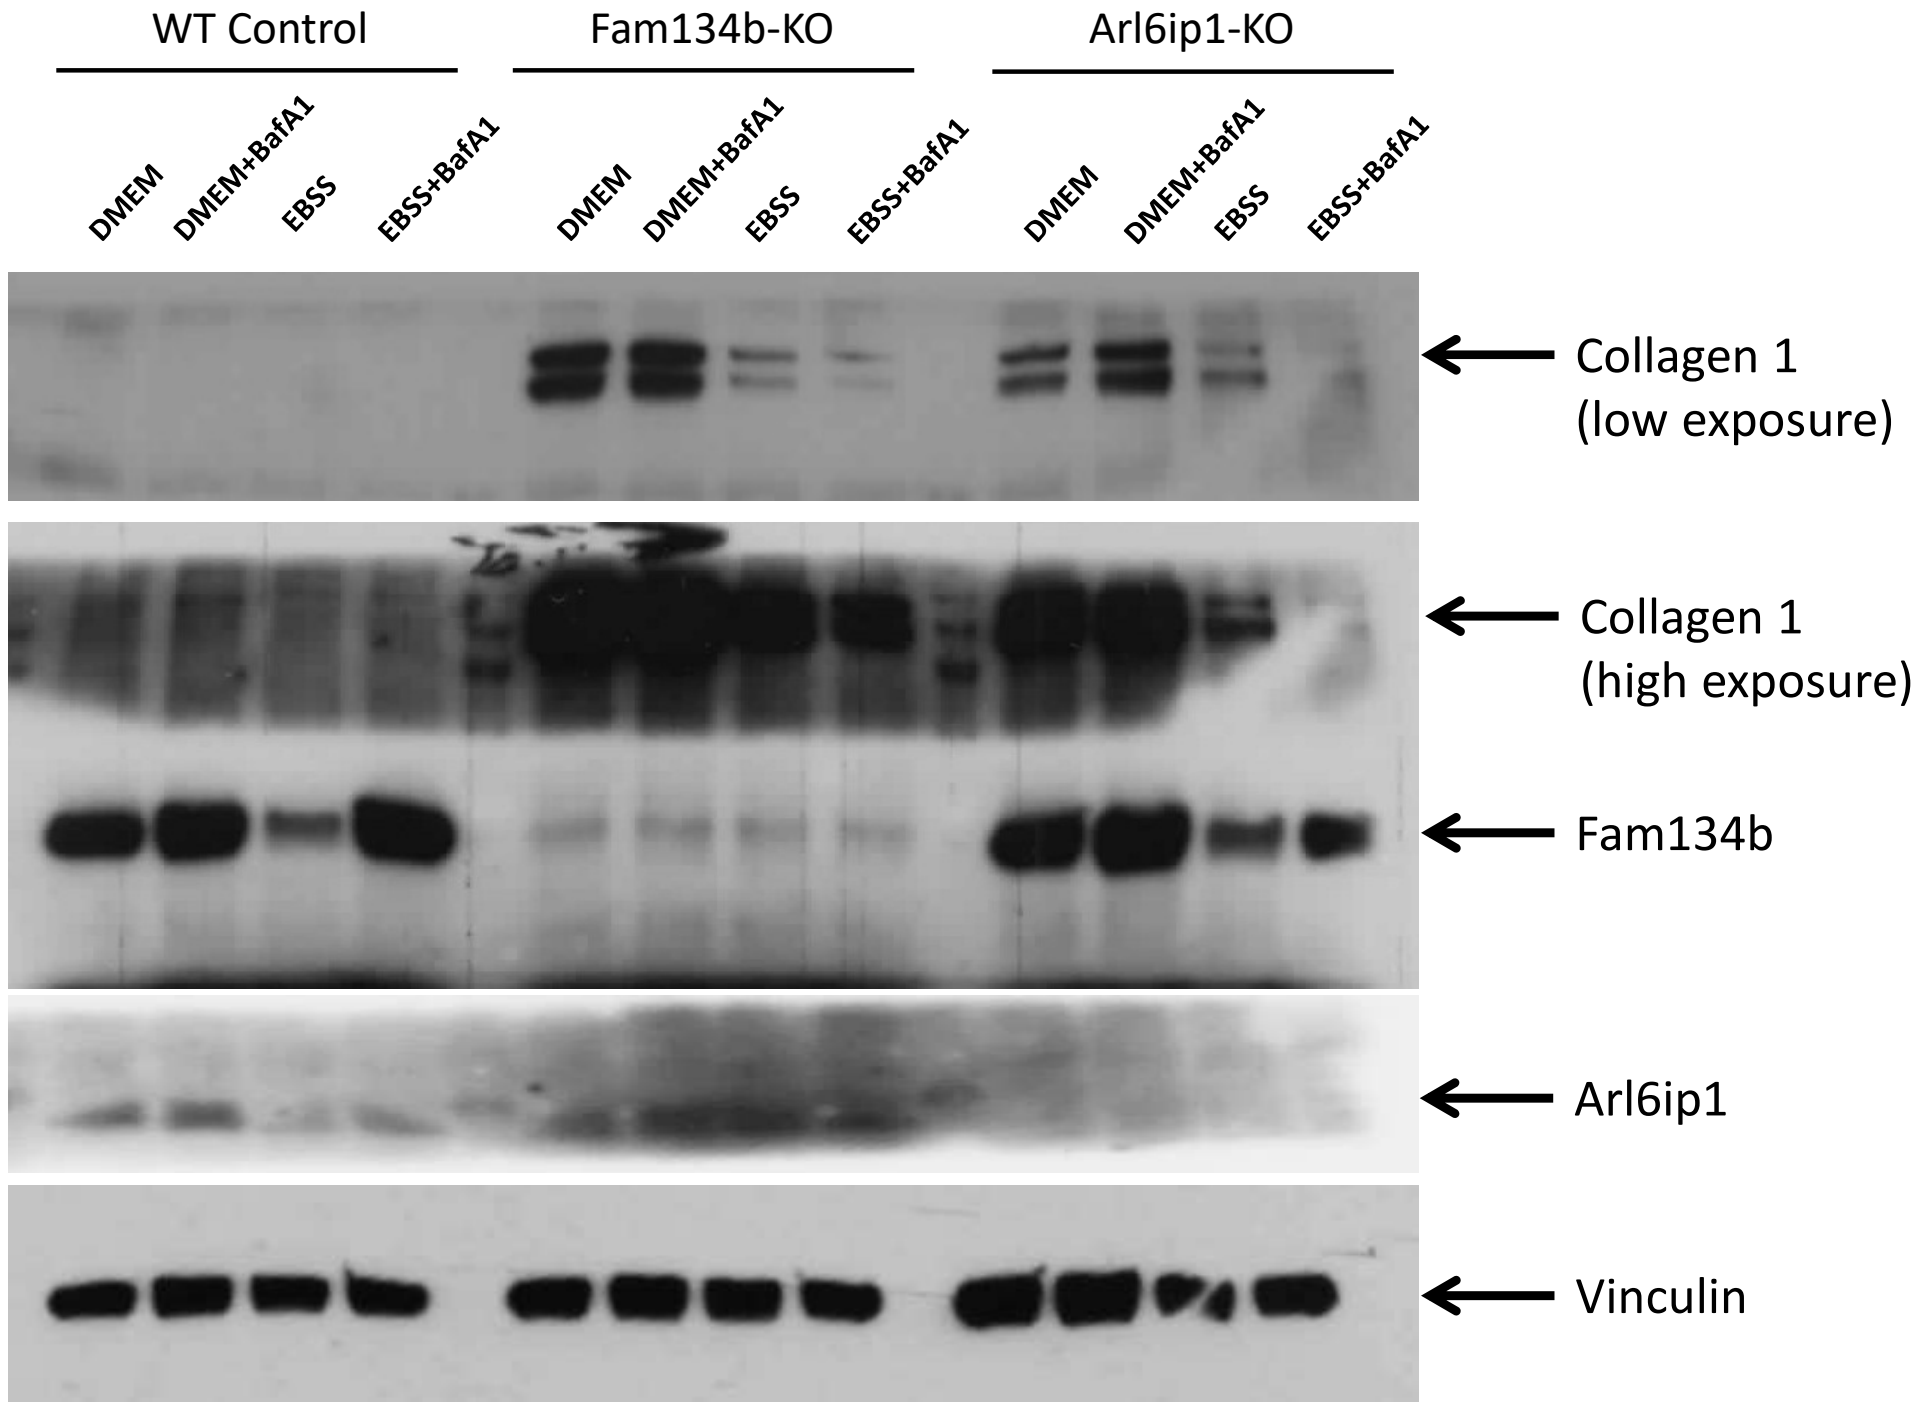

# Experiment 1

Healthy WT Control  
K193F\*fs heterocygous father  
K193F\*fs homocygous patient

Collagen 1

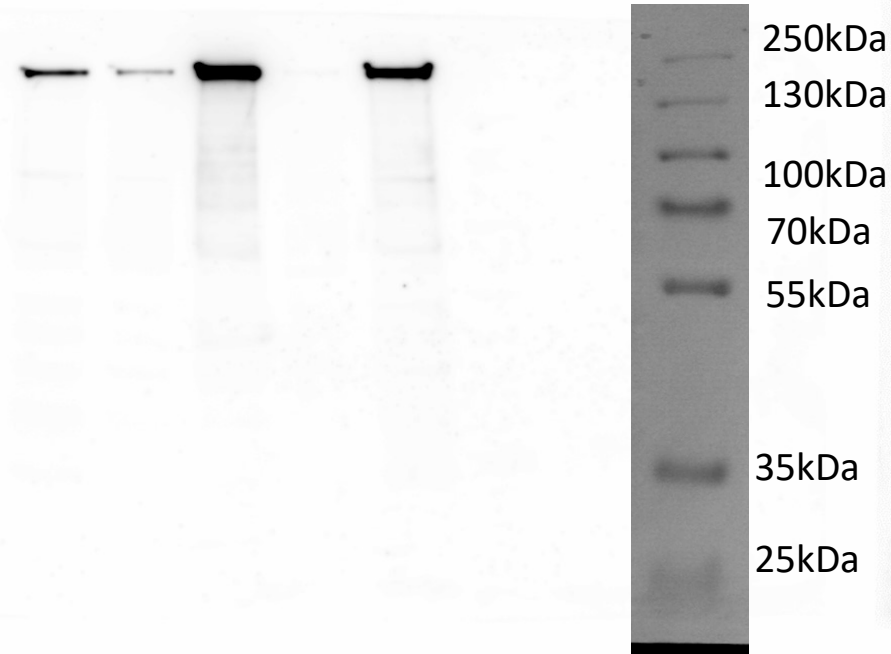

Healthy WT Control  
K193F\*fs heterocygous father  
K193F\*fs homocygous patient

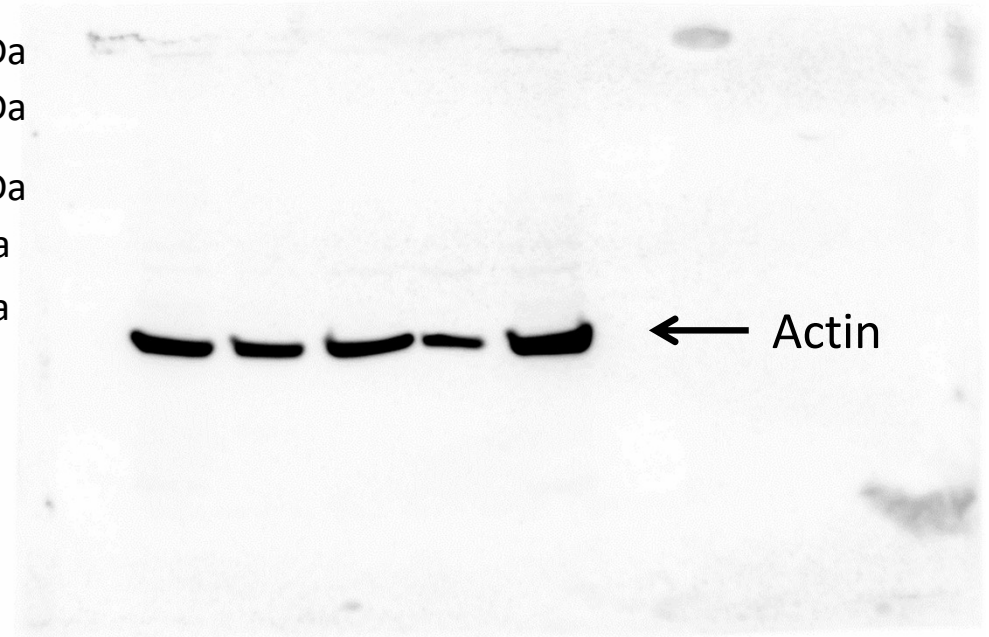

**EXT. FIG 9. F**

# Experiment 2

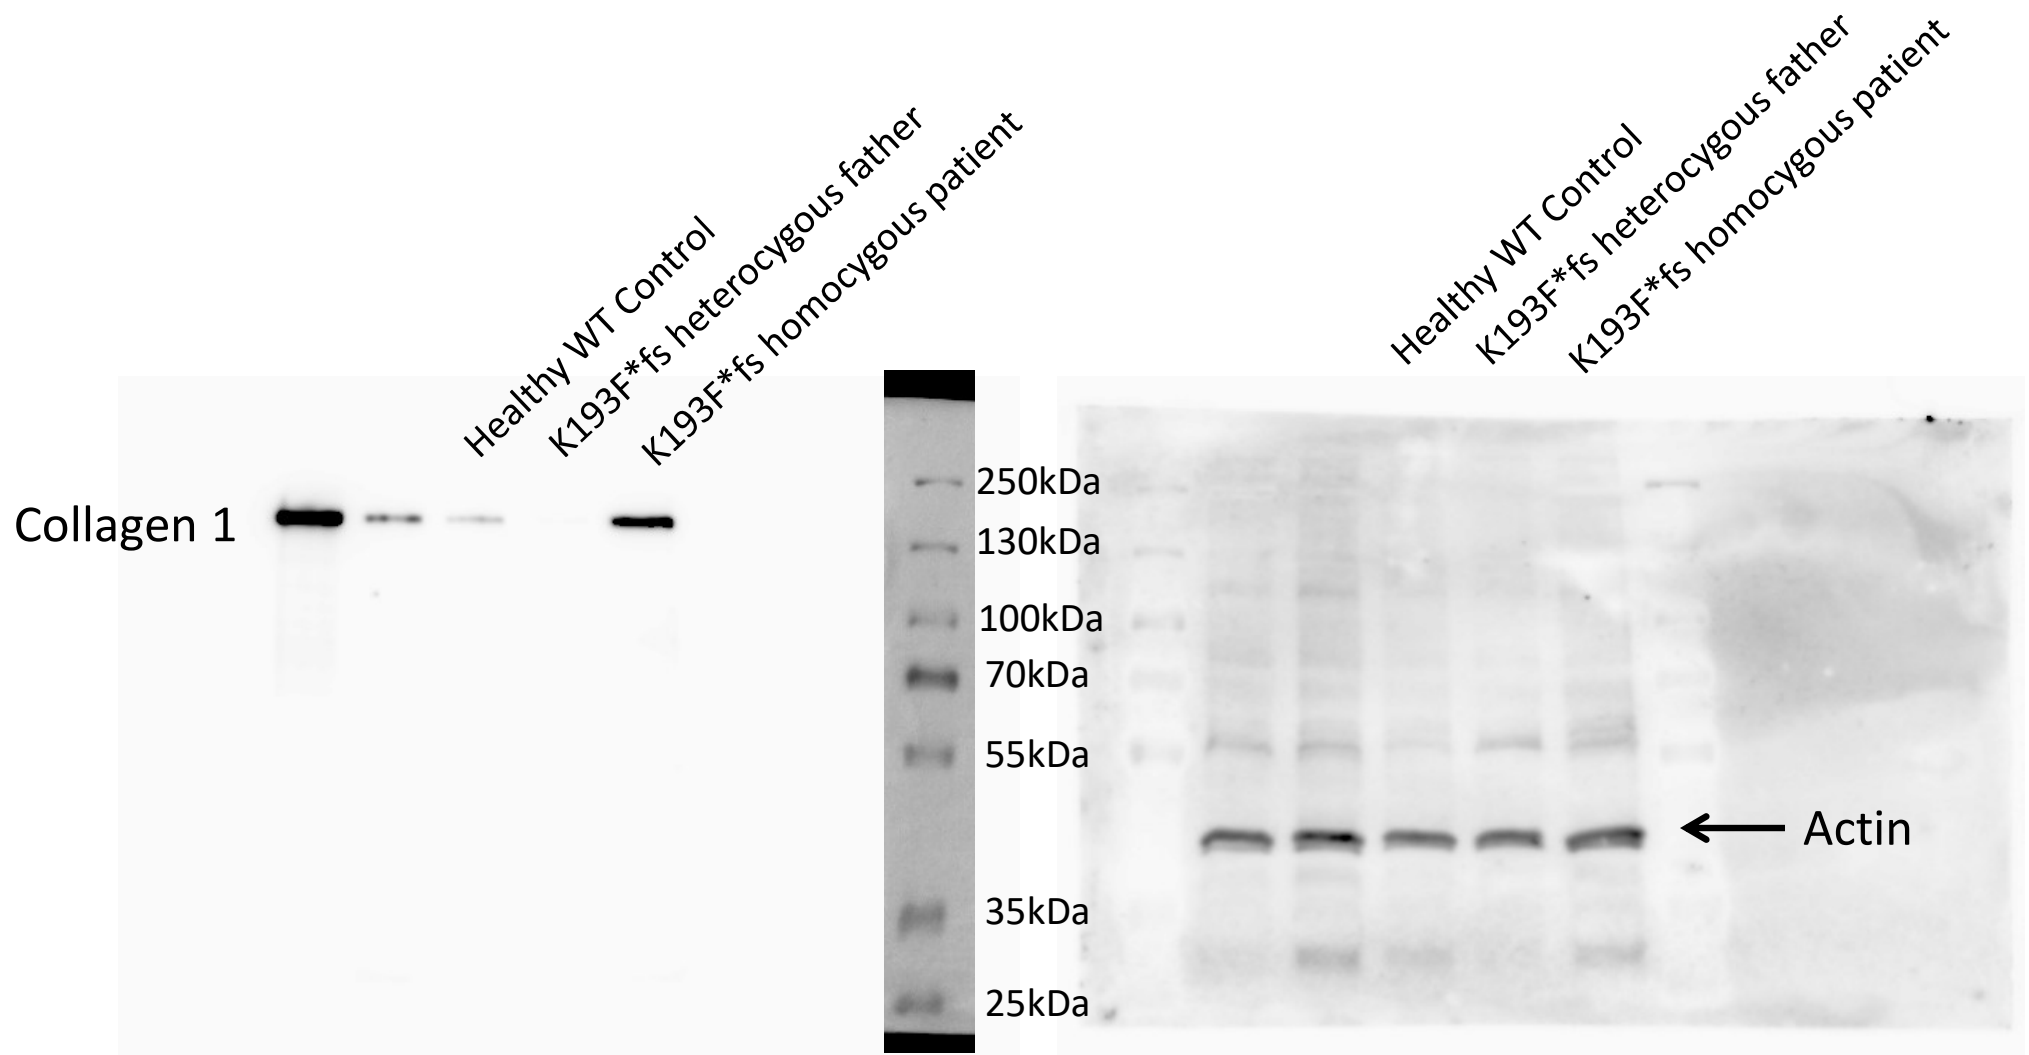

**EXT. FIG 9. F**

Experiment 3

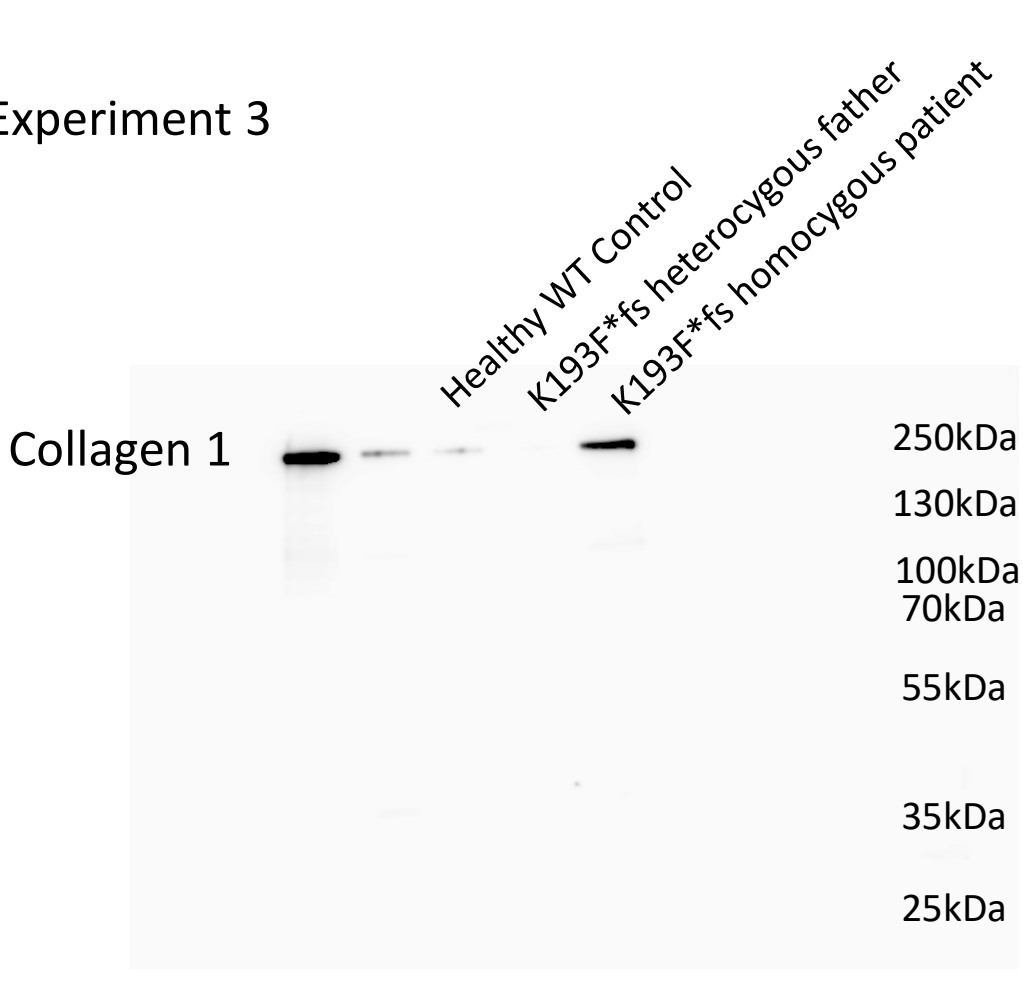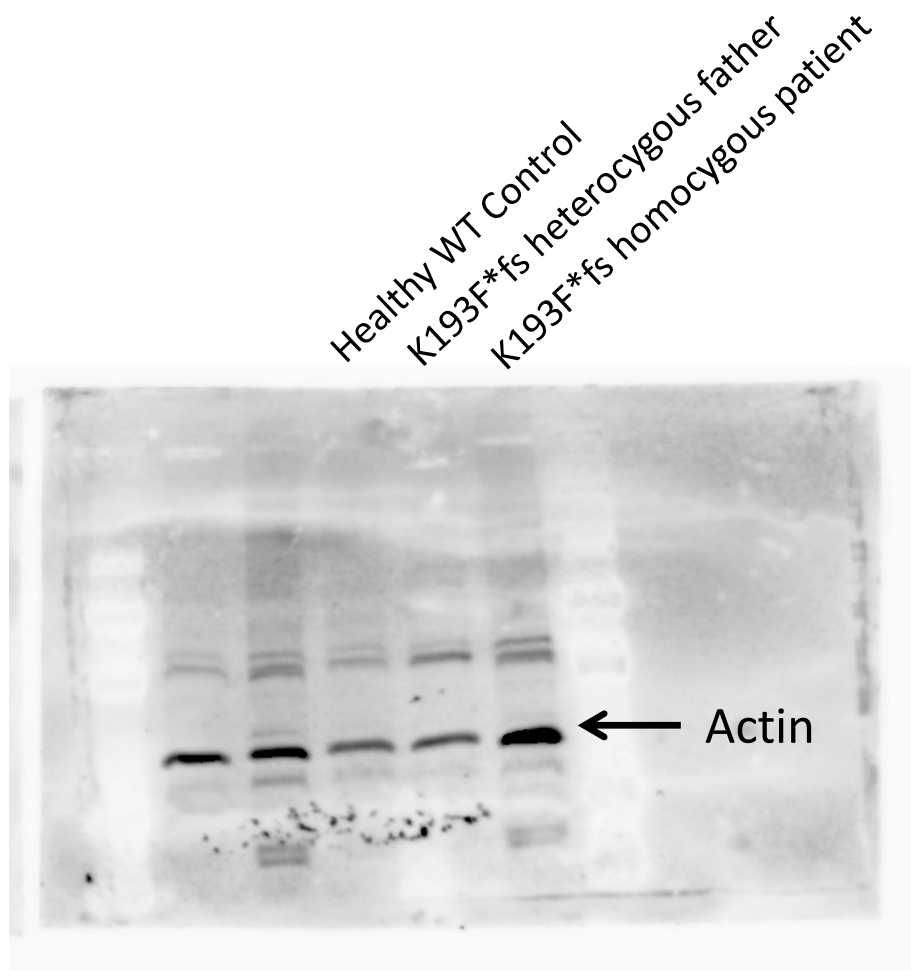

**EXT. FIG 9. F**
